# Supplementary material
Source: PubMed Central journal article supplement (PMC5813722)
Supplement: blood747303-suppl1.pdf [file blood747303-suppl1.pdf]

## SUPPLEMENTAL METHODS

### Cell lines and culture conditions

For our study, we used 11 GCB-DLBCL cell lines (DB, HT, OCI-Ly7, OCI-Ly8, OCI-Ly18, OCI-Ly19, Pfeiffer, SUDHL-4, SUDHL-6, SUDHL-7, and SUDHL-10) and 3 ABC-DLBCL cell lines (HBL-1, TMD8, and U2932). Basic characteristics of DLBCL cell lines used in the study are summarized below. All cell lines were cultured at 37°C with 5% CO<sub>2</sub> in RPMI media with L-glutamine (Gibco, catalog# 11875-119) supplemented with: fetal bovine serum (FBS, final concentration 10%; Atlanta Biologicals, catalog#: S11550), HEPES buffer (final concentration 20 mM; Gibco, catalog# 15630-080), sodium pyruvate (final concentration 1 mM; Gibco, catalog# 11360-070), gentamicin (final concentration 10 µg/ml; Gibco, catalog#: 15720-060), and penicillin/streptomycin (final concentration 100 U/mL and 100 µg/mL, respectively; Corning, catalog# 30-002-CI). Cell lines were validated by STR DNA fingerprinting by the MD Anderson Characterized Cell Line Core (CCLC) using the Promega 16 High Sensitivity STR Kit (Catalog # DC2100). The STR profiles matched known DNA fingerprints or were unique, based on comparison to 2556 known profiles of cell lines, including 2455 from online databases (see table below). The line designated as SUDHL-7 was matched to the SUDHL-8 cell line, but since confusion between these two names has been documented previously ([https://www.dsmz.de/fileadmin/Bereiche/HumanandAnimalCellLines/False\\_LL\\_Cell\\_Lines.pdf](https://www.dsmz.de/fileadmin/Bereiche/HumanandAnimalCellLines/False_LL_Cell_Lines.pdf)), we continued to use the name SUDHL-7. All cell lines were periodically tested for Mycoplasma contamination using a Mycoplasma PCR detection kit (Applied Biological Materials, catalog#: G238)

### Basic characteristics of DLBCL cell lines used, including Neon electroporation conditions.

| Cell line | Cell line type | Ig Heavy isotype | Ig light isotype | Electroporation condition         |
|-----------|----------------|------------------|------------------|-----------------------------------|
| DB        | GCB-DLBCL      | G                | L                | 1700 V, 20 ms, 1 Pulse, R buffer  |
| HBL-1     | ABC-DLBCL      | M                | K                | 1200 V, 20 ms, 2 Pulses, R buffer |
| HT        | GCB-DLBCL      | not expressed    | not expressed    | 1300 V, 30 ms, 1 Pulse, T buffer  |
| OCI-Ly7   | GCB-DLBCL      | M                | K                | 1700 V, 20 ms, 1 Pulse, R buffer  |
| OCI-Ly8   | GCB-DLBCL      | M                | L                | 1400 V, 10 ms, 3 Pulses, R buffer |
| OCI-Ly18  | GCB-DLBCL      | M                | not expressed    | 1600 V, 20 ms, 2 Pulses, T buffer |
| OCI-Ly19  | GCB-DLBCL      | M                | K                | 1500 V, 10 ms, 3 Pulses, R buffer |
| Pfeiffer  | GCB-DLBCL      | G                | K                | 1150 V, 30 ms, 2 Pulses, T buffer |
| SUDHL-4   | GCB-DLBCL      | G4               | K                | 1400 V, 20 ms, 2 Pulses, R buffer |
| SUDHL-6   | GCB-DLBCL      | M                | K                | 1700 V, 20 ms, 1 Pulse, R buffer  |
| SUDHL-7   | GCB-DLBCL      | G                | K                | 1400 V, 20 ms, 2 Pulses, R buffer |
| SUDHL-10  | GCB-DLBCL      | G                | L                | 1700 V, 20 ms, 1 Pulse, R buffer  |
| TMD8      | ABC-DLBCL      | M                | K                | 1700 V, 20 ms, 2 Pulses, T buffer |
| U2932     | ABC-DLBCL      | M                | K                | 1400 V, 20 ms, 1 Pulse, R buffer  |

### Results of cell line fingerprinting using STR.

| Source                                                                   | Sample Name | AMEL | CSF1PO | D13S317 | D16S539 | D5S818 | D7S820 | TH01  | TPOX | vWA   | Comments              |
|--------------------------------------------------------------------------|-------------|------|--------|---------|---------|--------|--------|-------|------|-------|-----------------------|
| Present study<br>Public database:<br>ATCC                                | DB          | X,Y  | 10,11  | 9,11,12 | 11      | 11     | 11     | 6,8   | 8    | 15,16 |                       |
|                                                                          | DB          | X,Y  | 10,11  | 11,12   | 11      | 11     | 11     | 6,8   | 8    | 15,16 | <b>MATCH</b>          |
| Present study                                                            | HBL1        | X    | 10,11  | 8,9     | 9,11    | 10,11  | 11,12  | 6,9   | 8,9  | 16,17 | <b>Unique profile</b> |
| Present study<br>Public database:<br>Sanger                              | HT          | X,Y  | 10     | 14      | 11,14   | 11,13  | 8,10   | 6,7   | 11   | 17,18 |                       |
|                                                                          | HT          | X,Y  | 10     | 13,14   | 11,13   | 11,13  | 8,10   | 6,7   | 11   | 17,18 | <b>MATCH</b>          |
| Present study<br>DSMZ, ATCC,<br>JCRB, RIKEN<br>online search<br>database | OCI-LY7     | X,Y  | 12,13  | 11,12   | 12,13   | 11,12  | 10     | 6,9.3 | 8,12 | 15,18 |                       |
|                                                                          | OCI-LY7     | X,Y  | 12,13  | 11,12   | 12,13   | 11,12  | 10     | 6,9.3 | 8,12 | 15,18 | <b>MATCH</b>          |
| Present study                                                            | OCI-LY8     | X    | 11,12  | 11      | 9,11    | 10,13  | 11,12  | 6,9.3 | 9,11 | 17,19 | <b>Unique profile</b> |

|                                                |          |     |       |       |       |          |       |       |       |       |                     |
|------------------------------------------------|----------|-----|-------|-------|-------|----------|-------|-------|-------|-------|---------------------|
| Present study                                  | OCI-LY18 | X   | 10,12 | 10,12 | 11,13 | 11,12    | 10,12 | 6,9   | 8,11  | 15,19 |                     |
| DSMZ, ATCC, JCRB, RIKEN online search database | OCI-LY18 | X   | 10,12 | 10,12 | 11,13 | 11,12    | 10,12 | 6,9   | 8,11  | 15,19 | <b>MATCH</b>        |
| Present study                                  | OCI-LY19 | X   | 10,11 | 11,12 | 11,12 | 11,14    | 9,12  | 7,9.3 | 8,9   | 16,17 |                     |
| MD Anderson CCLC database                      | OCI-LY19 | X   | 10,11 | 11,12 | 11,12 | 11,13,14 | 9,12  | 7,9.3 | 8,9   | 16,17 | <b>MATCH</b>        |
| Present study                                  | Pfeiffer | X,Y | 10,11 | 11,12 | 12    | 10,13    | 8,12  | 9,9.3 | 9     | 17,18 |                     |
| DSMZ, ATCC, JCRB, RIKEN online search database | Pfeiffer | X,Y | 10,11 | 11,12 | 12    | 10,13    | 8,12  | 9,9.3 | 9     | 17,18 | <b>MATCH</b>        |
| Present study                                  | SUDHL4   | X,Y | 12    | 11,12 | 11,13 | 11,12    | 8,11  | 6,9.3 | 9,11  | 18,19 |                     |
| DSMZ, ATCC, JCRB, RIKEN online search database | SUDHL4   | X,Y | 12    | 11,12 | 11,13 | 11,12    | 8,11  | 6,9.3 | 9,11  | 18,19 | <b>MATCH</b>        |
| Present study                                  | SUDHL-6  | X   | 10    | 12,14 | 11,12 | 12       | 10    | 6,9.3 | 11,12 | 14,17 |                     |
| MD Anderson CCLC database                      | SUDHL6   | X   | 10    | 12,14 | 11,12 | 12       | 10    | 6,9.3 | 11,12 | 14,17 | <b>MATCH</b>        |
| Present study                                  | SUDHL7   | X   | 11,12 | 11    | 12    | 11,13    | 8     | 6,9   | 8     | 15,19 |                     |
| Public database: DSMZ                          | SUDHL8   | X   | 11,12 | 11,13 | 12    | 11,13    | 8     | 6,9   | 8     | 15,19 | <b>MATCH SUDHL8</b> |
| Present study                                  | SUDHL10  | X,Y | 10,13 | 10,11 | 10,11 | 11,12    | 8,11  | 8,9.3 | 8     | 17    |                     |
| DSMZ, ATCC, JCRB, RIKEN online search database | SUDHL-10 | X,Y | 10,13 | 10,11 | 10,11 | 11,12    | 8,11  | 8,9.3 | 8     | 17    | <b>MATCH</b>        |
| Present study                                  | TMD8     | X,Y | 11,12 | 9,11  | 9,11  | 12,13    | 8,10  | 6,7   | 11    | 14,18 |                     |
| MD Anderson CCLC database                      | TMD8     | X,Y | 11,12 | 9,11  | 9,11  | 12,13    | 8,10  | 6,7   | 11    | 14,18 | <b>MATCH</b>        |
| Present study                                  | U2932    | X   | 10,12 | 11    | 12    | 12,13    | 9,13  | 9.3   | 11,12 | 14,17 |                     |
| Public database: DSMZ                          | U2932    | X   | 10,12 | 11    | 12    | 12       | 9,13  | 9.3   | 11,12 | 14,17 | <b>MATCH</b>        |

### Sequencing of immunoglobulin hypervariable regions (HVRs)

Sequences of immunoglobulin (Ig) heavy and light chain hypervariable regions (H-HVR and L-HVR, respectively) of cell lines were generally obtained by a two-step process. Individual HVRs were first amplified and sequenced from cDNA by an RT-PCR based method, most often using degenerate consensus primers.<sup>1</sup> For SUDHL-4, heavy and light chain HVRs were identified by a 5' RACE-based method,<sup>2</sup> including a reverse primer designed for identification of the light chain HVR (see table below). The most probable V, D (for H-HVR), and J segments were predicted using the IMGT/V-QUEST online tool<sup>3,4</sup> ([http://www.imgt.org/IMGT\\_vquest/share/textes/](http://www.imgt.org/IMGT_vquest/share/textes/)). In the second step, we used PCR with Advantage HD DNA polymerase (Clontech) to amplify the recombinant genomic location coding for the HVR, both as validation and to identify upstream and intronic regions to be used as homology arms. For this, primers were designed for each cell line separately; the forward primers began approximately 500 bp upstream of the start of translation of the predicted V region, according to Ensembl, and the reverse primers were designed downstream of predicted J segments or at the 3' end of the enhancer region. The genomic region was amplified as one long PCR product and sequenced from the ends and middle, except for the OCI-Ly7 heavy and light chain HVRs and the OCI-Ly19 light chain HVR; for these, the final sequence was determined from separately amplified overlapping parts, upstream (from approximately 500 bp upstream of the V to the cell line-specific J reverse primer) and downstream (from the cell line-specific forward primer in the middle of the V to the appropriate primer downstream of the J). For HBL-1, genomic sequences surrounding the kappa light chain HVR were identified from next-generation RNA sequencing data generated by the MD Anderson DNA Analysis Core Facility. Primers used for the PCR amplification of HVRs from genomic DNA and for their sequencing are listed in table below. All oligonucleotide primers (oligos) were ordered from Integrated DNA Technologies. All identified genomic sequences of HVRs used in our study are listed in the Sequences section below.

**Oligonucleotide sequences used for PCR amplification of genomic loci of recombined heavy and light hypervariable regions.**

| Name                             | 5' to 3' sequence                | Cell lines                                 | Comment         |
|----------------------------------|----------------------------------|--------------------------------------------|-----------------|
| <b>IgH HVR forward oligos</b>    |                                  |                                            |                 |
| HBL1_V4-34-upst_01_F             | AGTACACATTGCATGGATCC             | HBL1                                       |                 |
| V3-53_upst_01_F                  | CAGACTTCACTAGGCATAGTCC           | HT                                         |                 |
| Ly7_V1-69_upst_02_F              | TGCTGGACACTCATGTAGG              | OCI-Ly7                                    | upstream part   |
| Ly7_V1-69_03_F                   | CTGCAAGACTTCTAGAGACACC           | OCI-Ly7                                    | downstream part |
| IGHV4-59_upstr_01_F              | ATATTTTCAATCAGAAGTGTTAGAGG       | SUDHL-4                                    |                 |
| U2932_V4-39_upst_02_F            | GTCCTGTCATTATTACATTCAGC          | U2932                                      |                 |
| TMD8_V3-48_upst_02_F             | ATCCCAGACATGAGCTCC               | TMD8, OCI-Ly19, SUDHL-6                    |                 |
| <b>IgH HVR reverse oligos</b>    |                                  |                                            |                 |
| M-enh_02_R                       | GCTCAGTTACTCCATCAGACG            | HBL1, HT, OCI-Ly19, U2932, TMD8            |                 |
| IGH-J-region_02_R                | AATGGCAGAATGTCCATCC              | SUDHL4, SUDHL-6, OCI-Ly7 (downstream part) |                 |
| OCI-Ly7_J_R                      | CCTGAGGAGACGGTGACCAG             | OCI-Ly7 (upstream part) J specific reverse |                 |
| <b>IgH HVR sequencing oligos</b> |                                  |                                            |                 |
| HBL1-V4-34_03_F                  | GGACTGTTGAAGCCTTCG               | HBL1                                       |                 |
| V3-53_03_F                       | GTGCAACCTCTGACTTCACC             | HT                                         |                 |
| Ly19_V3-48_04_F                  | CCAGTGTGAAGTTGAGTTGG             | OCI-Ly19                                   |                 |
| DHL4-V4-59_03_F                  | TACTCCTGGACTTGGATCC              | SUDHL4                                     |                 |
| U2932_V4-39_03_F                 | CACCTGCACTGTCTCTCG               | U2932                                      |                 |
| TMD8_V3-48_03_F                  | CCTGAGACTCTCCTGTGTAGC            | TMD8                                       |                 |
| <b>IgL 5' RACE oligos</b>        |                                  |                                            |                 |
| IGK-RACE_1-R                     | CCTCTCTGGGATAGAAGTTATTCAGCAGGC   |                                            |                 |
| IGK-RACE_2-R                     | CTTTGTGTTTCTCGTAGTCTGCTTTGCTCAGC |                                            |                 |
| <b>IgL HVR forward oligos</b>    |                                  |                                            |                 |
| Ly7-KV4-1-upst_01_F              | ATTAGCCAGACAAGTTTGACC            | OCI-Ly7                                    | upstream part   |
| Ly7-KV4-1_03_F                   | CCTGGCTGTGTCTCTGG                | OCI-Ly7                                    | downstream part |
| Ly19-KV1-39-upst_01_F            | ACATGAAACAATGGGAACC              | OCI-Ly19                                   | upstream part   |
| Ly19-KV1-39_03_F                 | CCCTGTGAGCATCTGTAGG              | OCI-Ly19                                   | downstream part |
| IGKV2-28_upstr_01_F              | GGGTAGATTCCAACACTTGC             | SUDHL-4                                    |                 |
| IGKV1-5_upstr_01_F               | ACCTGCAGTCTTGATAGTGG             | SUDHL-6                                    |                 |
| U2932_KV3-20-upst_01_F           | AAATGGTATCACTACCCTGAGG           | U2932                                      |                 |
| TMD8_KV2-30_01_upst_F            | ATTAGTAAATATTTGTGGAAACATGG       | TMD8                                       |                 |
| <b>IgL HVR reverse oligos</b>    |                                  |                                            |                 |
| Kappa_01_R                       | TCACTTTTGAGATCAGCTGG             | U2932                                      |                 |
| Kappa_04_R                       | GTTAGATCCCTGGCATCC               | OCI-Ly7 (downstream part), SUDHL-6, TMD8   |                 |
| Kappa_05_R                       | GTCCTGTGGAACAATTTCC              | OCI-Ly19 (downstream part)                 |                 |
| Kappa_07_R                       | ATGAGCTCTATCTGTGAAGCC            | SUDHL-4                                    |                 |
| OCI-Ly7_J_R                      | TTTGATTTCCACCTTGGTC              | OCI-Ly7 J specific R                       | upstream part   |
| OCI-Ly19_J_R                     | TCTGATTTCCACCTTGGTC              | OCI-Ly19 J specific R                      | upstream part   |
| <b>IgL sequencing oligo</b>      |                                  |                                            |                 |
| IGKV2-28_seq_03_F                | AATGCTCTGGGTCTCTGG               | SUDHL-4                                    |                 |
| IGKV1-5_03_F                     | CAGTCAGAGTATTTATAACTGGTTGG       | SUDHL-6                                    |                 |

|                   |                        |       |  |
|-------------------|------------------------|-------|--|
| U2932_KV3-20_03_F | TGTTAGCAGCAGCTACTTAACC | U2932 |  |
| TMD8_KV2-30_03_F  | GTCTCCACTCTCCCTCTCC    | TMD8  |  |

### Transfection

For experiments in which transfection of cell lines with plasmid DNA was needed, we used the Neon electroporation device (Thermo Fisher Scientific, catalog# MPK5000). The optimal electroporation conditions for each line were determined using the pre-programmed 24 well plate optimization protocol (Thermo Fisher Scientific) with 10  $\mu$ L electroporation volumes (Thermo Fisher Scientific, catalog# MPK1096). All experiments were carried out using 100  $\mu$ L volumes (Thermo Fisher Scientific, catalog# MPK10096). Cells growing in log phase were prepared for electroporation by changing cell culture medium every day for three days prior to the electroporation, and were washed once with PBS. For each electroporation, 1.2 million cells were re-suspended in 120  $\mu$ L of appropriate electroporation buffer (R or T), mixed with maxiprep plasmid DNA (PureLink® HiPure Plasmid Filter Maxiprep Kit, ThermoFisher Scientific, Catalog#: K210017), and electroporated with the conditions optimum for the cell line (see table in Cell lines and culture conditions section of Supplemental Methods). Cells were then re-suspended in 3 mL of pre-warmed antibiotic-free culture media.

### Knock out experiments and complementation

The CRISPR/Cas9 system<sup>5</sup> was used for all knockout (KO) experiments. We used chimeric plasmids developed in the Zhang laboratory: pX330-U6-Chimeric\_BB-CBh-hSpCas9<sup>5</sup> (pX330; Addgene plasmid # 42230, coding for Cas9 as well as gRNA) and pSpCas9(BB)-2A-GFP<sup>6</sup> (pX458; Addgene plasmid # 48138; coding for Cas9 linked by 2A peptide with GFP and for gRNA expression). Target sequences were designed using the Zhang laboratory online CRISPR Design Tool<sup>7</sup> (<http://crispr.mit.edu/>). Target sequences were ligated as annealed oligos into BbsI-opened pX330, pX335, or pX458 plasmids according to the published protocol.<sup>6</sup> After verification of gRNA sequences, maxiprep DNA was used for electroporation-based cell transfection. We used 12  $\mu$ g of plasmid DNA (pX330 or pX458, with cloned gRNA sequence) per 120  $\mu$ L of cell suspension (1 million cells per 100  $\mu$ L) in electroporation buffer for each electroporation. To KO all three AKT isoforms simultaneously, 7  $\mu$ g each of pX330 AKT1/2\_03 and pX330 AKT3\_06 plasmids per 120  $\mu$ L of cell suspension in electroporation buffer were used together for each electroporation. When KO was attempted by Cas9/gRNA plasmids alone (i.e., without knock-in of a marker protein), cells with successful KO were detected by flow cytometry (FCM; see below) and followed over time. Targeted genes and corresponding sequences of CRISPR/Cas9 target sites are listed in table below. For KO experiments, targeting multiple sites of the gene of interest controlled for the specificity of the KO effect, and we did not detect any phenotype differences between these replicates. To further control for specificity (and set FCM parameters) in every KO experiment, a non-specific pX330 plasmid (usually targeting the HVR of a different cell line) was also electroporated. The effect of BCR KO was complemented by transiently expressing constitutively-active myristoylated murine AKT1 (MyrAKT) using the 786 pCsmAKT2Acherry mAKT and mCherry expression plasmid<sup>8</sup> (Addgene plasmid #31167). This plasmid was co-electroporated with the appropriate pX330 BCR targeting plasmid (10  $\mu$ g of each per 1.2 million cells in 120  $\mu$ L of R or T buffer per electroporation), and BCR-negative, mCherry-positive cells (indicating MyrAKT expression) were followed. As a control, a GFP expression plasmid (pcDNA 6.2 emGFP, Thermo Fisher Scientific) was co-electroporated, and BCR-negative, GFP-positive cells were followed. Similarly, the MyrAKT expression plasmid was used for rescue of the effect of pan-AKT KO.

### Sequences of genomic target sites used for knock out (KO) experiments.

| Name         | Target Sequence (5' to 3') | Plasmid | Location                | Use                |
|--------------|----------------------------|---------|-------------------------|--------------------|
| HBL-1_HV_01  | GTTCACAGGGGTCCTGTCCCAGG    | pX330   | HBL-1 H-HVR V region    | BCR KO in HBL-1    |
| HBL-1_HV_03  | CCTCAGGTGAGTCCTCACGTCTC    | pX330   | HBL-1 H-HVR J region    | BCR KO in HBL-1    |
| Ly7_HV_02    | GGCAGAGTCACGATTACCGCGG     | pX330   | OCI-Ly7 H-HVR V region  | BCR KO in OCI-Ly7  |
| Ly7_HV_03    | CTGTGTGACCGGCCCGCGGGG      | pX330   | OCI-Ly7 H-HVR junction  | BCR KO in OCI-Ly7  |
| Ly7_HV_04    | GTTTGGAGTGCATGGGGCCAGGG    | pX330   | OCI-Ly7 H-HVR junction  | BCR KO in OCI-Ly7  |
| Ly19_HV_02   | TGTCCAGTGTGAAGTTGAGTTGG    | pX330   | OCI-Ly19 H-HVR V region | BCR KO in OCI-Ly19 |
| Ly19_HV_03   | CCACCAACTCAACTTCACACTGG    | pX330   | OCI-Ly19 H-HVR V region | BCR KO in OCI-Ly19 |
| Ly19_HV_04   | GAAGTTGAGTTGGTGGAGTCTGG    | pX330   | OCI-Ly19 H-HVR V region | BCR KO in OCI-Ly19 |
| Ly19_HV_05   | CACCTGAGGAGACGGTGACCAGG    | pX330   | OCI-Ly19 H-HVR J region | BCR KO in OCI-Ly19 |
| Ly19_HV_08   | CAGAGGACTACCATGAAGTTGG     | pX330   | OCI-Ly19 H-HVR V region | BCR KO in OCI-Ly19 |
| SUDHL4_HV_01 | GTGGTTCTTCCTTCTCGTGGTGG    | pX330   | SUDHL-4 H-HVR V region  | BCR KO in SUDHL-4  |
| SUDHL4_HV_03 | TCAAAGTTGTGCCCGTAATCAGG    | pX330   | SUDHL-4 H-HVR junction  | BCR KO in SUDHL-4  |

|              |                          |       |                                                |                     |
|--------------|--------------------------|-------|------------------------------------------------|---------------------|
| SUDHL6_HV_02 | GAAGTGCAGATGGTGGAAATCTGG | pX330 | SUDHL-6 H-HVR V region                         | BCR KO in SUDHL-6   |
| SUDHL6_HV_03 | GAACCTTGGTACACCCGGGGGGG  | pX330 | SUDHL-6 H-HVR V region                         | BCR KO in SUDHL-6   |
| SUDHL6_HV_04 | CCGTCTCCTCGGGTGAGTCCGC   | pX330 | SUDHL-6 H-HVR J region                         | BCR KO in SUDHL-6   |
| TMD8_HV_01   | CAGAGGCCTCACCATGGATTTGG  | pX330 | TMD8 H-HVR V region                            | BCR KO in TMD8      |
| TMD8_HV_02   | ACAGCCCCAAATCCATGGTGAGG  | pX330 | TMD8 H-HVR V region                            | BCR KO in TMD8      |
| TMD8_HV_03   | TGAAGACTCACCTGAGGAGACGG  | pX330 | TMD8 H-HVR J region                            | BCR KO in TMD8      |
| U2932_HV_02  | GCAAGAAAATGAAGCACCTGTGG  | pX330 | U2932 H-HVR V region                           | BCR KO in U2932     |
| U2932_HV_04  | AGGTACTTCTTTGACTACTGGGG  | pX330 | U2932 H-HVR J region                           | BCR KO in U2932     |
| IGHG-C1      | GAACCGGTGACGGTGTCTGTGG   | pX330 | exon 1 of IGHG1, IGHG2, IGHG4, IGHG4           | BCR KO in IgG lines |
| IGHG-C2      | GGACTGTAGGACAGCCGGGAAGG  | pX330 |                                                |                     |
| IGHG-C3      | ACTCTACTCCCTCAGCAGCGTGG  | pX330 | exon 3 of IGHG1, IGHG2, IGHG4; exon 6 of IGHG3 |                     |
| IGHG-C4      | CGGTGAGGACGCTGACCACACGG  | pX330 |                                                |                     |
| IGHG-C5      | GGCAAGGAGTACAAGTGCAAGG   | pX330 |                                                |                     |
| IGHG-C6      | TTTGAGATGGTTTTCTCGATGG   | pX330 |                                                |                     |
| IGHM-C1      | CACGCTGCTCGTATCCGACGGGG  | pX330 | exon 1 of IGHM                                 | BCR KO in IgM lines |
| IGHM-C2      | GGCCGTTGGCTGCCTCGCACAGG  | pX330 |                                                |                     |
| IGHM-C3      | GCCTCCAAGGACGTCATGCAGG   | pX330 |                                                |                     |
| IGHM-C4      | AGATGAGCTTGGACTTGCGGGGG  | pX330 | exon 2 of IGHM                                 |                     |
| IGHM-C5      | CAGGTGTCTGGCTGCGCGAGGG   | pX330 |                                                |                     |
| IGHM-C6      | ACCTGCCGCGTGGATCACAGGGG  | pX330 |                                                |                     |
| AKT1/2_03    | GGATCTTCATGGCGTAGTAGCGG  | pX330 | exon 5 of AKT1 and exon 6 of AKT2              | AKT 1/2 KO          |
| AKT3_06      | TCCCCTCAACAACTTTTTCAGTGG | pX330 | exon 3 of AKT3                                 | AKT 3 KO            |
| CXCR4-DG1    | GCTTCTACCCCAATGACTTGTGG  | pX330 | exon 1 of CXCR4                                | CXCR4 KO            |
| CXCR4-OH3    | CACTTCAGATAACTACACCGAGG  | pX330 | exon 1 of CXCR4                                | CXCR4 KO            |
| CD19_01      | TGGAATGTTTCGACCTAGGTGG   | pX330 | exon 3 of CD19                                 | CD19 KO             |
| CD19_02      | GCCTCCGTGTCTCCACCGAGGG   | pX330 |                                                |                     |
| CD19_03      | GACCGCCCTGAGATCTGGGAGGG  | pX330 |                                                |                     |
| SYK_01       | TTTCGGCAACATCACCCGGGAGG  | pX458 | exon 1 of SYK                                  | SYK KO              |
| SYK_02       | ACCATCGAGCGGGAGCTGAATGG  | pX458 |                                                |                     |
| SYK_03       | GAAGATTACCTGGTCCAGGGGGG  | pX458 |                                                |                     |
| CD79B_05     | AACGCCACCATCCAGTGGCTGGG  | pX330 | exon 1 of CD79B                                | CD79B KO            |
| CD79B_06     | GCAGCAACGCCACCATCCAGTGG  | pX330 |                                                |                     |
| GFP          | GGGCGAGGAGCTGTTACCGGGG   | pX330 | GFP                                            | GFP KO              |

### Knock-in experiments

The CRISPR/Cas9 system was used also for knock-in (KI) by homologous recombination (HR). This was the case for KI alone, as well as to provide a marker for KO of genes which were not easily measured by FCM. Generally, one or more Cas9/gRNA plasmids creating DNA double strand breaks (DSB) at desired locations were co-electroporated with an HR template plasmid, which contained (in 5' to 3' order): a left homology arm (LHA), covering 200-400 bp of genomic sequence upstream of the first or only DSB; the sequence to be inserted; and the right homology arm (RHA), covering 200-400 bp downstream of the second or only DSB. All homology arms and inserts contained silent mutations to prevent targeting of the repair plasmid or modified genomic locus by the Cas9/gRNA pairs. If not stated elsewhere, homology arms and KI sequences for insertion were ordered as gBlocks Gene Fragments (Integrated DNA Technologies), captured in a pSC-B-amp/kan plasmid using the StrataClone Ultra Blunt PCR Cloning Kit (Agilent Technologies, catalog#: 240218), verified by sequencing, and then used for cloning. The general approach to construct the HR template plasmids was to design the upstream and downstream homology arms as one gBlock, in which they were separated by a cassette containing two type IIS restriction enzyme sites in opposite orientation. The cassette was consequently used for “seamless” insertion of the sequence for KI. Details and specific sequences of all HR templates are given in the Sequences section below.

In general, KI was used to: 1) replace the endogenous H-HVR and L-HVR sequences at the genomic level, together with KI of a fluorescent protein (FP) as a marker of genomic modification; 2) achieve “KI/KO” (i.e., mark KO cells for further analysis), by KI of a marker protein (FP or mCD8a), in frame in a translated exon, followed by a STOP codon and polyA signal sequence; 3) KI variants of CD79A, together with a FP as a marker of modification; and 4) KI to repair a single nucleotide deletion in the H-HVR of cell line HT, to cause re-expression of its BCR. In all cases, modified cells were detected and followed by FCM (see below). To confirm specificity of KI, each KI experiment included a parallel electroporation of non-specific pX300 or paired pX335 plasmids, usually targeting HVRs of a different cell line, in combination with the specific HR template plasmid. From few to no marker-positive cells were detected in the specificity controls. In all cases, modified cells were detected and followed by FCM (see below). Additional details of these types of KI are as follows:

**1) H-HVR and L-HVR replacement.** For each cell line, in regions flanking the genomic sequence coding for the IgH or IgL HVR, we identified a suitable upstream Cas9/gRNA target site (near the translation start site of the IMGT/V-QUEST-predicted V segment) and a downstream Cas9/gRNA target site (in the 3' end of the predicted J region or the following intron). The general structure of the repair template plasmid, from 5' to 3', was: LHA; FP; 58-AA F2A; HVR; and RHA. In more detail, the homology arms were 200-400 bp each, as described above; the FP cDNA was positioned, relative to a Kozak sequence (original or added), to be the start of in-frame translation; the FP was emGFP for H-HVR replacement and mTurquoise2 for L-HVR replacement; the F2A sequence was 58 amino acids long, found to work best to separate the FP from the following HVR<sup>9</sup>; and the inserted HVR sequences included the leader sequence of the new HVR as well as the V intron. After HR-mediated KI, the modified genomic sequence extended from the V region translation initiation site to the 3' end of the J segment. The endogenous IgH or IgL promoter thus drives the expression of the FP (as a marker of modification) as well as the separate IgH or IgL, containing replaced HVRs. The emGFP sequence was cloned from the pcDNA 6.2 emGFP plasmid (Thermo Fisher Scientific), and the mTurquoise2 sequence was cloned from the pLifeAct-mTurquoise2 plasmid<sup>10</sup> (Addgene Plasmid #36201). If cells were already expressing GFP as marker of CD79A modification (see below), mRFP (Addgene Plasmid #13032) was used as the marker of H-HVR replacement.

HVRs recognizing tetanus toxoid (TTox) were based on paired HVR sequences from TTox-reactive single B cells;<sup>11</sup> two pairs of IgH and IgL HVRs (TTox 3 and TTox 6) were chosen because of the similarity of their predicted V segments to those of some of the lymphoma cell lines studied. To re-create the full TTox HVR sequences, we added sequences coding for the leader sequence, and the intron, based on the V segment predicted by IMGT/V-QUEST from the published partial TTox HVR sequences. For experiments in which HVRs of the U2932 cell line were “reverted” to their naïve form, free of somatic hypermutation, we designed HVRs based on the unmutated reference sequences of the IMGT/V-QUEST-predicted V, D, and J segments. Additional nucleotides predicted to have been inserted at the V-D and D-J junctions of U2932 HVRs were not modified. HVRs recognizing ovalbumin (OVA) were designed based on published HVR sequences from OBI RAG1<sup>-/-</sup> mice with OVA-reactive B-cells.<sup>12</sup> To re-create the full OVA HVR, we added 5' parts of the full HVRs (including leader sequence and V intron) based on the mouse reference sequence of the V segment predicted by IMGT/V-QUEST. CRISPR/Cas9 target sequences used in HVR replacement are listed in table below. HA fragments with inserted FPs and F2A sequence, as well as individual H-HVR and L-HVR fragments that were ligated into them, are listed in the Sequences section below. For the majority of HVR replacement experiments, we replaced the IgH and IgL HVRs simultaneously, by electroporating six plasmids (upstream and downstream CRISPR/Cas9 plasmids and an HR template plasmid for each Ig chain) at once, using 4 µg of each per electroporation of 1.2 million cells re-suspended in 120 µL of R or T buffer. We followed the double HVR-replaced (GFP- and mTurquoise2-positive) cells by FCM and bead assays (see below). In all experiments, we used control HVR replacements in which the original (endogenous) HVR was inserted together with the fluorescent marker.

**2) Knock-in/knockout (KI/KO) approach.** We used this “gene trapping” approach to express GFP instead of PTEN in multiple lines, and to express mCD8a instead of the BCR in the OCI-Ly19 cell line. For PTEN, we used paired nickases<sup>13</sup> to target the region just downstream of the PTEN translation initiation site, using D10A Cas9 mutant (expressed from pX335-U6-Chimeric\_BB-CBh-hSpCas9n(D10A) plasmid; Addgene plasmid #42335).<sup>5</sup> The HR template plasmid had the following structure: LHA-GFP-STOP-PolyA-RHA. After HR-mediated DNA repair, the GFP sequence was inserted in frame immediately after the PTEN translation initiation site, ending with a stop codon and bGH polyA signal sequence. For this, three plasmids were co-electroporated: two pX335 plasmids (6 µg each) and the HR template plasmid (7 µg) per 1.2 million cells re-suspended in 120 µL of R or T buffer. A similar approach inserted mCD8a-STOP-PolyA in the IgH locus in the OCI-Ly19 cell line, serving as a reporter for BCR KO. The sequence coding for mCD8a, excluding its signal peptide, was inserted in frame just after the end of the OCI-Ly19 H-HVR leader sequence. 12 µg of one of the pX330 plasmids, together with 8 µg of the HR template plasmid, was electroporated per 1.2 million cells re-suspended in 120 µL of R or T buffer. The mCD8a sequence for cloning was ordered as a gBlock gene fragment and inserted between OCI-Ly19 H-HVR specific homology arms. CRISPR/Cas9 target sequences used for the KI/KO approach are listed in table below.

**3) Modifications of CD79A.** These were made in the region of the gene coding for the ITAM domain, involving the end of exon 4 and the beginning of exon 5, which are the last two exons of CD79A. Two pX330 plasmids were used to create DSB in both exons (see table below). The HR template plasmid contained homology arms upstream of the CRISPR/Cas9 target site in exon 4 and downstream of the CRISPR/Cas9 target site in exon 5, so that translation of the endogenous CD79A exon 4 continues to exon 5 in the knocked-in sequence version, followed by a STOP and bGH polyA signal sequence. Modified versions of CD79A were: wild-type (WT) full-length CD79A-GFP fusion; WT full-length CD79A-3xFLAG fusion; truncated CD79A (ending with L187

and thus deleting the ITAM) fused to 3xFLAG; full-length CD79A-GFP fusion with mutation of both ITAM Tyr residues (Y188F and Y199F); full-length CD79A-GFP fusion with Y188F mutation only; and full-length CD79A-GFP fusion with Y199F mutation only. For the CD79A modification, we co-electroporated the two pX330 plasmids (6 µg each) and the HR template plasmid (7 µg) per 1.2 million cells re-suspended in 120 µL of R or T buffer. Details of the sequence of the CD79A HR template plasmids are provided in the Sequences section below.

**4) BCR re-expression.** Analysis of the genomic sequence coding for the H-HVR of the HT cell line, first identified from cDNA (indicating active transcription), showed a single nucleotide deletion in the VDJ junction region, causing a frame shift with consequent downstream premature termination of translation (Figures S8A-S8C). A pX330 plasmid was used to create a DSB close to the deletion, and an HR template plasmid carrying a corrected HVR sequence allowed KI of a frame-restoring nucleotide. We co-electroporated the two pX330 plasmids (6 µg each) and 7 µg of the HR template plasmid per 1.2 million HT cells re-suspended in 120 µL of T buffer. The sequences of the HT H-HVR and HR plasmid are provided in the Sequences section below. Used target sites are listed in table below.

#### Sequences of genomic target sites used for knock-in (KI) experiments.

| Name                     | Target Sequence (5' to 3') | Plasmid | Location                   | Use                        |
|--------------------------|----------------------------|---------|----------------------------|----------------------------|
| <b>HVR replacement</b>   |                            |         |                            |                            |
| HBL1_HV_07               | GAAGTGCTTTCTGAGAGTCATGG    | pX330   | V 5' UTR                   | HBL-1 H-HVR replacement    |
| HBL1_HV_04               | AAACCAGGAGAGACGTTGTGAGG    | pX330   | beginning of post J intron | HBL-1 H-HVR replacement    |
| HBL1_LV_01               | TGGAGAAGAGCTGCTCAGTTAGG    | pX330   | V 5' UTR                   | HBL-1 L-HVR replacement    |
| HBL1_LV_04               | TCGTGAGATTTTAGTGCCATTGG    | pX330   | beginning of post J intron | HBL-1 L-HVR replacement    |
| Ly7_HV_06                | CCCAGGGGCTTCTTTAGAGGAGG    | pX330   | V 5' UTR                   | OCI-Ly7 H-HVR replacement  |
| Ly7_HV_07                | CTCATAATCTATCATAATGTAGG    | pX330   | beginning of post J intron | OCI-Ly7 H-HVR replacement  |
| Ly7_LV_02                | CTGAGCTACAACAGGCAGGCAGG    | pX330   | V 5' UTR                   | OCI-Ly7 L-HVR replacement  |
| Ly7_LV_04                | ACAGAAGACACAGACAAGTGG      | pX330   | beginning of post J intron | OCI-Ly7 L-HVR replacement  |
| Ly19_HV_08               | CAGAGGACTCACCATGAAGTTGG    | pX330   | beginning of V             | OCI-Ly19 H-HVR replacement |
| Ly19_HV_06               | AAAGTAAATGAGACGTTGTGAGG    | pX330   | beginning of post J intron | OCI-Ly19 H-HVR replacement |
| Ly19_LV_01               | AGAGATTTTCCCTGAAGTTCCGG    | pX330   | V intron                   | OCI-Ly19 L-HVR replacement |
| Ly19_LV_03               | ATATATCACTTCATAGACACAGG    | pX330   | beginning of post J intron | OCI-Ly19 L-HVR replacement |
| SUDHL4_HV_01             | GTGGTTCCTTCTCGTGGTGG       | pX330   | beginning of V             | SUDHL-4 H-HVR replacement  |
| SUDHL4_HV_04             | CCACAACACTTCTCACTCTGAGG    | pX330   | beginning of post J intron | SUDHL-4 H-HVR replacement  |
| SUDHL4_LV_02             | AGATGATGCTCCTCTAACACAGG    | pX330   | V intron                   | SUDHL-4 L-HVR replacement  |
| SUDHL4_LV_04             | TTTCGGCGGAGGGACCAAGGTGG    | pX330   | J region                   | SUDHL-4 L-HVR replacement  |
| SUDHL6_HV_05             | TCAGAGTTAAGGTTGGACTGAGG    | pX330   | beginning of post J intron | SUDHL-6 H-HVR replacement  |
| SUDHL6_HV_06             | TGGAAATGCCTTGAATCCAGGG     | pX330   | V 5' UTR                   | SUDHL-6 H-HVR replacement  |
| SUDHL6_LV_01             | AGGCTGGTCACACTTTGTGCAGG    | pX330   | V 5' UTR                   | SUDHL-6 L-HVR replacement  |
| SUDHL6_LV_03             | ACCGAATACACAGACAATTGAGG    | pX330   | beginning of post J intron | SUDHL-6 L-HVR replacement  |
| U2932_HV_02              | GCAAGAAAATGAAGCACCTGTGG    | pX330   | beginning of V             | U2932 H-HVR replacement    |
| U2932_HV_03              | AAAGCAGGAGAGAGGTCGTGAGG    | pX330   | beginning of post J intron | U2932 H-HVR replacement    |
| U2932_LV_01              | TGGAGAAGAGCTGCTCAGTTAGG    | pX330   | V 5' UTR                   | U2932 L-HVR replacement    |
| U2932_LV_04              | TAGATCACTTCATAGACACAGGG    | pX330   | beginning of post J intron | U2932 L-HVR replacement    |
| <b>KI/KO experiments</b> |                            |         |                            |                            |

|                                       |                         |       |                                                           |                          |
|---------------------------------------|-------------------------|-------|-----------------------------------------------------------|--------------------------|
| PTEN_TS_01:                           | TTGACCTGTATCCATTTCTGCGG | pX335 | translation initiation region                             | PTEN KO/GFP KI           |
| PTEN_TS_02:                           | TTGATGATGGCTGTCATGTCTGG | pX335 | translation initiation region                             | PTEN KO/GFP KI           |
| Ly19_HV_02                            | TGTCCAGTGTGAAGTTGAGTTGG | pX330 | beginning of OCI-Ly19 H-HVR V region 2 <sup>nd</sup> exon | BCR KO/mCD8a KI          |
| Ly19_HV_03                            | CCACCAACTCAACTTCACACTGG | pX330 | beginning of OCI-Ly19 H-HVR V region 2 <sup>nd</sup> exon | BCR KO/mCD8a KI          |
| Ly19_HV_04                            | GAAGTTGAGTTGGTGGAGTCTGG | pX330 | beginning of OCI-Ly19 H-HVR V region 2 <sup>nd</sup> exon | BCR KO/mCD8a KI          |
| <b>CD79A modifications</b>            |                         |       |                                                           |                          |
| CD79A_01                              | ACCCTTCACTCACTTCATAAAGG | pX330 | End of CD79A exon 4                                       | CD79A modification by KI |
| CD79A_02                              | GGACGACTGCTCCATGTATGAGG | pX330 | Beginning of CD79A exon 5                                 | CD79A modification by KI |
| <b>HT cell line BCR re-expression</b> |                         |       |                                                           |                          |
| HT_HV_02                              | CTACTTTGACTCCTGGAGTCAGG | pX330 | VDJ junction                                              | BCR re-expression        |
| HT_HV_03                              | CACCTGAGGAGACGGTGACCAGG | pX330 | J region                                                  | BCR re-expression        |

### Inducible B-cell receptor expression and isotype comparison

To control expression of the BCR at varied surface levels, the general approach was to KO the endogenous IgH chain and express a cDNA encoding a complete IgH chain (with HVR and constant region) through a doxycycline (Dox)-inducible transposon-based system.<sup>14</sup> The SUDHL-4 line was chosen for these experiments, because of its extreme dependence on tonic BCR signaling, but that same dependence required a system by which cells with KO of the endogenous IgH could be detected while expressing an exogenous IgH of the same isotype. This was accomplished by using SUDHL-4 cells that had been modified, by KI at the IgH locus, to express GFP in the 5' portion of the endogenous IgH transcript, in front of the H-HVR; those cells had served as controls for H-HVR replacement experiments. These cells were then transduced with pSBtet-Bla plasmid (Addgene Plasmid #60510) for inducible expression of a cDNA containing the SUDHL-4 H-HVR joined to an IgH constant region, either IgG4 (the isotype used by SUDHL-4) or IgM constant. After selection of transduced SUDHL-4 cells with Blasticidin (ThermoFisher Scientific, #A1113903) at 10µg/mL, KO of the endogenous IgH chain was done using a GFP-targeting CRISPR/Cas9 pX330 plasmid (see above); the target site, in 5' to 3' orientation, was GGGCGAGGAGCTGTTACCG. First, we verified that GFP negative cells were also BCR KO (48 hours after electroporation) and then viably sorted GFP-negative cells by FCM (see below). Immediately after the sorting, cells were re-suspended in media containing doxycycline hyclate (Dox; Sigma, #D9891-5G; final concentration, 200 ng/mL) to express the SUDHL-4 HVR IgM/IgG from the integrated inducible transposon cassette, so as to rescue and expand the modified cells. A similar but different method was used to create OCI-Ly19 cells with inducible surface BCR expression. WT OCI-Ly19 cells were transduced with pSBtet-Bla plasmid for inducible expression of a cDNA containing the OCI-Ly19 H-HVR joined to IgM or IgG4 constant regions. Blasticidin-selected cells were then electroporated for KI/KO (see above) of the endogenous IgH chain, marked by mCD8a expression, and mCD8a-positive cells were viably sorted for further experiments. Final modified versions of SUDHL-4 and OCI-Ly19 were cultured in medium containing Dox at full concentration (200 ng/mL) for maximal BCR expression (to compare IgM vs. IgG isotypes), or with Dox over a dilution series of concentrations (to determine the effect of varied BCR levels). BCR levels were analyzed using FCM (see below) and cell growth was assessed using bead assay (see below). To determine the relationship between GFP fluorescence (from GFP fused to CD79A; see above) and BCR surface expression (estimated using Ab staining), OCI-Ly19 cells expressing WT CD79A fused to GFP were modified similarly to enable controllable BCR expression.

### Flow cytometry, image cytometry, and cell sorting

For detection of cell-surface antigens, approximately 1 million cells for each sample were washed once with FACS buffer (PBS with 1% FBS) and then re-suspended in 100 µL of FACS buffer containing the working dilution of antibody (see table below) and incubated 30 min on ice in the dark. Cells were then washed once with FACS buffer and re-suspended in 200 µL of FACS buffer containing a 1:1000 dilution of SYTOX® Blue (Thermo Fisher Scientific; catalog#: S34857) or SYTOX® Red (Thermo Fisher Scientific; catalog#: S34859) dead cell stains and analyzed using an LSR Fortessa flow cytometer (BD Biosciences). Intracellular antigens were detected as follows: approximately 1 million cells per sample were washed once with PBS and re-suspended in PBS with 1:1000 dilution of Ghost Dye Violet 450 (Tonbo Biosciences; catalog#: 13-0863-T500) to stain for dead cells. Cells were then washed once with FACS buffer and stained for surface antigens (30 min incubation in 100 µL of FACS buffer with the working dilution of Ab followed by one wash with FACS buffer). Fixation, permeabilization, and intracellular staining was consequently done using the Cytofix/Cytoperm™ Fixation/Permeabilization Solution Kit (BD Biosciences; catalog#: 554714). In brief, cells were incubated 20 minutes on ice in fixation/permeabilization buffer, then washed once with permeabilization/wash buffer and cell pellets re-suspended in 50 µL of permeabilization/wash buffer containing the working dilution of desired antibody (see table below) followed by 30 min incubation on ice in dark. Cells were then washed once with the permeabilization/wash



buffer, re-suspended in 200  $\mu$ L of FACS buffer, and analyzed on an LSR Fortessa flow cytometer (BD Biosciences). FCM data were analyzed by FlowJo software (FlowJo). Cell surface density of GFP or CD79B surface staining was calculated on a per-cell basis as fluorescence intensity divided by the squared forward scatter (FSC) value and multiplied by  $10^6$ . When needed for other purposes, such as gene expression profiling or Western blotting, the KO or KI fraction of viable cells was sorted by FCM to purity at the MD Anderson Flow Cytometry core facility using FACS Aria™ II or FACS Aria™ Fusion sorters (both from BD Biosciences). Cells for imaging cytometry measuring cell size were prepared by the same procedures as for cell cycle analysis (see below) including surface BCR staining and FxCycle™ PI/RNase Staining Solution (ThermoFisher Scientific, catalog#: F10797). Cells for imaging colocalization were prepared similarly as for flow cytometry (see above). Data were acquired using an ImageStream®X Mark II Imaging Flow Cytometer (ED Millipore) with data analyzed using IDEAS® Software (ED Millipore), including the similarity bright detail score (SBDS) calculation feature. The SBDS, calculated for each cell image separately, is based on goodness of correlation between two fluorescent intensities across individual pixels.<sup>15</sup>

#### Antibodies used for flow cytometry and microscopy.

| Antibody                                                                      | Conjugation            | Working Dilution | Company                   | Catalog #   |
|-------------------------------------------------------------------------------|------------------------|------------------|---------------------------|-------------|
| <b>Cell surface antigens</b>                                                  |                        |                  |                           |             |
| F(ab') <sub>2</sub> -Goat anti-Human IgM Molecular Probes™ Secondary Antibody | FITC                   | 1:100            | Thermo Fisher Scientific  | H15101      |
| Goat anti-Human IgM Molecular Probes™ Secondary Antibody                      | FITC                   | 1:100            | Thermo Fisher Scientific  | H15001      |
| Goat anti-Human IgM Molecular Probes™ Secondary Antibody                      | RPE                    | 1:100            | Thermo Fisher Scientific  | H15104      |
| Goat anti-Human IgM Heavy Chain Secondary Antibody                            | Alexa Fluor® 647       | 1:100            | Thermo Fisher Scientific  | A-21249     |
| Goat anti-Human IgG Molecular Probes™ Secondary Antibody                      | FITC                   | 1:100            | Thermo Fisher Scientific  | H10001C     |
| Goat anti-Human IgG Molecular Probes™ Secondary Antibody                      | Alexa Fluor® 488       | 1:100            | Thermo Fisher Scientific  | H10120      |
| Goat anti-Human IgG Molecular Probes™ Secondary Antibody                      | RPE                    | 1:100            | Thermo Fisher Scientific  | H10104      |
| Mouse anti-Human Kappa Light Chain Molecular Probes™ Secondary Antibody       | APC                    | 1:100            | Thermo Fisher Scientific  | MH10515     |
| Mouse anti-Human Kappa Light Chain Molecular Probes™ Secondary Antibody       | RPE                    | 1:100            | Thermo Fisher Scientific  | MH10514     |
| Mouse anti-Human Kappa Light Chain Molecular Probes™ Secondary Antibody       | Alexa Fluor® 488       | 1:100            | Thermo Fisher Scientific  | MH10520     |
| Mouse anti-Human Lambda Light Chain Molecular Probes™ Secondary Antibody      | RPE                    | 1:100            | Thermo Fisher Scientific  | MH10614     |
| Lambda Light Chain Antibody (1-155-2),                                        | APC                    | 1:100            | Thermo Fisher Scientific  | A15730      |
| Mouse Anti-Human CD19                                                         | APC                    | 1:10             | BD Biosciences            | 555415      |
| Anti-Human CD184 (CXCR4)                                                      | APC                    | 1:50             | eBioscience               | 17-9999-42  |
| Mouse Anti-Human CD79b                                                        | PE                     | 1:10             | BD Biosciences            | 557931      |
| Rat Anti-Mouse CD8a                                                           | PE                     | 1:50             | BD Biosciences            | 553033      |
| Goat F(ab') <sub>2</sub> IgG FITC - Isotype Control                           | FITC                   | 1:50             | Abcam                     | ab37394     |
| <b>Intracellular antigens</b>                                                 |                        |                  |                           |             |
| Anti-Human Syk                                                                | APC                    | 1:20             | eBioscience               | 17-6696-42  |
| Phospho-Syk (Tyr525/526) (C87C1) Rabbit mAb                                   | PE                     | 1:20             | Cell Signaling Technology | 6485        |
| DYKDDDDK Tag Antibody                                                         | Alexa Fluor® 647       | 1:50             | Cell Signaling Technology | 3916        |
| Akt (pan) (C67E7) Rabbit mAb                                                  | PE                     | 1:50             | Cell Signaling Technology | 8790        |
| Rabbit (DA1E) mAb IgG XP® Isotype Control                                     | PE                     | 1:200            | Cell Signaling Technology | 5742        |
| Mouse Anti-Human CD79a                                                        | APC                    | 1:10             | BD Biosciences            | 551134      |
| <b>Ab used for BCR KO detection in FRET experiments</b>                       |                        |                  |                           |             |
| AffiniPure Fab Fragment Goat Anti-Human IgM                                   | Alexa Fluor® 647       | 1:100            | Jackson ImmunoResearch    | 109-607-043 |
| AffiniPure Fab Fragment Goat Anti-Human IgM                                   | Rhodamine Red™-X (RRX) | 1:100            | Jackson ImmunoResearch    | 109-297-043 |
| AffiniPure Fab Fragment Goat Anti-Human IgG (H+L)                             | Alexa Fluor® 647       | 1:100            | Jackson ImmunoResearch    | 109-607-003 |

|                                                   |                        |       |                        |             |
|---------------------------------------------------|------------------------|-------|------------------------|-------------|
| AffiniPure Fab Fragment Goat Anti-Human IgG (H+L) | Rhodamine Red™-X (RRX) | 1:100 | Jackson ImmunoResearch | 109-297-003 |
|---------------------------------------------------|------------------------|-------|------------------------|-------------|

### Bead assay

The absolute growth rates of WT and modified cell lines were assessed by the change over time in the calculated absolute number of cells in culture.<sup>16</sup> At any point in time, this number was determined as follows: an aliquot of well-suspended cells in culture, representing a known fraction of the culture volume, was removed and stained for FCM as described above, so as to be able to identify a population (or populations) of interest (e.g., KO cells). In the last re-suspension of pelleted cells before FCM, the buffer included 10  $\mu$ L of a stock solution containing 6.0-8.0  $\mu$ m polystyrene particles (beads; Spherotech Inc.; Catalog#: PP-60-10; a 1:20 dilution of the original solution). The beads are a distinguishable separate population of events by FCM, with low forward scatter and high side scatter (Figures 5D and 5E). From the ratio of the FCM-determined counts of beads and the cell population of interest, and the volume of the culture aliquot used, the absolute number of the cells of interest in the culture can be calculated. If the culture is maintained over time by passaging via known dilutions, the growth curve of exponential increase in absolute cell number (logarithmic) over time (linear) can be constructed. For each line, the relative proliferation after BCR KO was quantified as the slope of the growth curve after BCR KO divided by the slope of the growth curve for control cells.

### Cell viability assays of drug sensitivity

Cell suspensions, adjusted to approximately  $5 \times 10^4$  cells/mL, were plated in triplicate with drug dilutions in 96 well-plates at 200  $\mu$ L/well. After 72 hour incubations, cultures were sampled for detection of ATP by the CellTiter-Glo assay (Promega) according to the manufacturer's instructions. Dose-response curves and IC<sub>50</sub> values were generated using GraphPad Prism software. Small-molecule inhibitors P505-15 (SYK) and CAL-101 (PI3K p110 $\delta$  isoform) were obtained from Selleck Chemicals.

### DNA content for cell cycle analysis

Approximately 1 million cells from mixed cultures of WT and BCR KO cells were first stained for BCR expression according to the protocol above, with all steps performed at 4°C. Cells were then fixed with 1% paraformaldehyde (to preserve surface BCR staining) and washed with FACS buffer (PBS+1% FBS). Cell pellets were then re-suspended in 0.3 mL of neat PBS (no protein) and 2 mL of cold 54% ethanol was slowly added while vortexing. Cells were then incubated at 4°C overnight before washing once with FACS buffer. Cell pellets were re-suspended in 0.5 mL of FxCycle™ PI/RNase Staining Solution (ThermoFisher Scientific, catalog#: F10797) and incubated for 30 min at RT. Cells were then analyzed without washing on an LSR Fortessa flow cytometer (BD Biosciences) with linear scale detection of propidium iodide signal on slow acquisition speed.

### Apoptosis detection

Apoptotic cells were detected in mixed cultures of WT and BCR KO live cells using the green fluorogenic apoptotic substrate PhiPhiLux® G1D2 (OncoImmunin) measuring the activity of caspase-3 and caspase-3 like activity. Cells were processed according to the manufacturer's protocol; in brief, pelleted cells were re-suspended in the provided 10  $\mu$ M substrate solution (in RPMI 1640 medium with 25 mM HEPES, both Gibco) with added FBS to a final concentration of 10%. Cells were incubated at 37°C for 40 min and washed with the provided FCM dilution buffer and consequently stained for BCR expression with APC-conjugated anti-human kappa Ab (see table in Flow cytometry, image cytometry, and cell sorting section of Supplemental Methods) and SYTOX Blue dead cell dye (Thermo Fisher Scientific; catalog#: S34857) as described above, with all steps at 4°C. The apoptotic cells were detected on a BD LSR Fortessa flow cytometer using 488 nm laser excitation with 530/30 filter setting (FITC channel).

### Calcium flux

Sorted pure cultures of HVR double-replaced cells (expressing GFP and mTurquoise2) or CD79A modified cells (expressing GFP) were mixed with WT cells and loaded with Indo-1 as follows: cells were re-suspended in cell loading media (CLM; RPMI with 2% FBS and 25mM HEPES) containing 2  $\mu$ M Indo-1 (AM, cell permeant; ThermoFisher Scientific, catalog#: I1223) and 0.05% of Pluronic® F-127 (ThermoFisher Scientific, catalog#: P-6866) and incubated for 45 minutes at 37° C in the dark. Cells were then washed twice with DMEM medium containing 2% FBS and re-suspended in CLM for analysis. Cells were stimulated with F(ab')<sub>2</sub> anti-human IgM goat Ab (Jackson ImmunoResearch, catalog#: 109-006-129), F(ab')<sub>2</sub> anti-human IgG goat Ab (Jackson ImmunoResearch, catalog#: 109-006-098) (12  $\mu$ g per 1 mL of cell suspension), or a complex of tetanus toxoid (TTTox) mixed with anti-TTTox Ab; the latter was made by mixing 2  $\mu$ L of TTTox (Colorado Serum Company, catalog#: 11401) for 10 minutes at RT with 2  $\mu$ L (8  $\mu$ g) of anti-TTTox goat polyclonal Ab (Abcam; catalog#: ab156655) for stimulation of 1 mL of cell suspension. To stimulate the OVA-recognizing BCR, we used an OVA 17-mer peptide (biotin-FDKLPGFGDSIEAQGGK,

custom-synthesized at GenScript) previously published to bind to the OB1 HVR sequences.<sup>17</sup> To induce BCR activation, OVA 17-mer-biotin was mixed with avidin (Pierce™ Avidin; ThermoFisher Scientific; catalog#: 21128) in a 4:1 molar ratio, respectively, and 20 µL of 10 µM solution (calculated as molarity of added avidin) was used for stimulation of 1 mL of cell suspension. Calcium response was measured as the ratio of emission intensity of Indo-1 with bound Ca<sup>2+</sup> (using 379/28 filter without LP filter) and unbound Ca<sup>2+</sup> (using 509/20 and 470 LP filters) when excited with a 355 nm laser on an LSR Fortessa flow cytometer (BD Bioscience).

### Chemotaxis assay

Electroporation of GCB-DLBCL cell lines OCI-Ly7, OCI-Ly19, and SUDHL-4 with Cas9/gRNA vectors produced a stable proportion of viable CXCR4 KO cells, determined by FCM with anti-CXCR4 antibody conjugated with APC (eBioscience, clone 12G5) and a dead cell dye, SYTOX Blue (ThermoFisher). Chemotaxis was assayed as previously published.<sup>18</sup> Cells in mixed cultures of CXCR4-positive and CXCR4-KO cells were counted and then conditioned in RPMI1640 medium without fetal bovine serum for one hour. 500,000 cells in 0.1 mL complete medium were then placed in the upper insert of a 24-well Transwell plate (Corning, catalog# 3421) with 5 µm pore size, with 0.6 mL of complete medium in the lower chamber, with 10 nM CXCL12 (R&D Systems, catalog# 350-NS). After 6 hours, cells in the lower chamber were collected and examined by FCM for proportions by CXCR4 expression.

### Western blotting

As described above, cells with BCR KO were isolated by flow cytometric sorting. Specifically, 4-7 days after electroporation with chimeric Cas9/gRNA plasmids, cells were stained with fluorescent antibody to human IgM or IgG, appropriate to the line being sorted, and cells lacking surface BCR expression were collected and returned to culture for an additional 1-7 days. Variation in times depended on the sensitivity of the line to BCR KO, and the rapidity of surface BCR decline after KO. 2-4 different gRNA sequences targeting the IgH chain, whether in the HVR or constant region, were used in separate electroporations and sortings. As controls for the effect of electroporation, sorting, and subsequent culture, 1-2 replicates of GFP+ cells were collected that had been electroporated in parallel with empty px458 plasmid. Aliquots of the sorted and cultured cells were re-examined by FCM for purity just before harvest.

Harvested cells were lysed in RIPA Buffer (Sigma Aldrich) containing PhosSTOP Phosphatase Inhibitor Cocktail and cComplete Protease Inhibitor Cocktail (Roche, Indianapolis, IN) and loaded onto NuPAGE® Novex® 4%-12% gradient gels (Life Technologies). After electrophoresis protein was transferred onto PVDF membranes (EMD Millipore, Darmstadt, Germany). Membranes were blocked for 1 h at room temperature with PBS containing 0.1% Tween (PBS-T) and either 5% BSA (when detecting phosphoproteins) or 5% milk (when detecting total protein). Primary antibodies were diluted in blocking solution at the recommended concentrations. Membranes were incubated overnight at 4 °C. The following day membranes were washed three times for 10 min with PBS-T and incubated with species-specific HRP-linked secondary antibody (GE Healthcare) (diluted 1:10,000) for 1 h at room temperature. Protein was visualized via ECL detection (Pierce, Rockford, IL) according to the supplier's instructions.

The following antibodies were used for immunoblot analysis: anti-SYK, anti-pZAP-70 (T319)/pSYK(Y352), anti-AKT, anti-pAKT (S473), anti-PTEN, and anti-GAPDH (Cell Signaling Technologies, Danvers, MA); anti-IgM, anti-IgG (Abcam, Cambridge, MA).

### Electrochemiluminescent assay

To detect changes in AKT phosphorylation at Ser473 and Thr308, we used electrochemiluminescent assay kits from Meso Scale Discovery: Phospho (Ser473)/Total Akt Whole Cell Lysate Kit and Phospho-Akt (Thr308) Whole Cell Lysate Kit. BCR KO and control cells were generally prepared similarly as for Western blotting (see above). To overcome the limitation of high toxicity of BCR KO in the SUDHL-4 line, cells prepared for inducible IgH expression (see above) in this cell line were used, comparing BCR-positive cells (fully Dox-stimulated) and BCR-negative cells (4 days after Dox withdrawal). All cells were lysed with lysis buffer consisting of 1% Triton X-100, 50mM HEPES (pH 7.4), 150 mM NaCl, 1.5 mM MgCl<sub>2</sub>, 1 mM EGTA, and 10% glycerol with freshly added MSD Phosphatase Inhibitor I, Phosphatase Inhibitor II, and Protease Inhibitor Solution. Protein concentration was measured using Pierce™ BCA Protein Assay Kit (ThermoFisher Scientific) and 10 µg of total protein was loaded per MSD assay well. Measurement of phosphorylated Ser473 and Thr308 was done in duplicates and in parallel using the same lysates according to the manufacturer's instructions. Plates were imaged by the QuickPlex SQ 120 instrument (Meso Scale Discovery) and signal normalized by subtraction of negative control values.

## Super resolution microscopy

To visualize the distribution of the BCR complex in the cell membrane, live cells expressing the CD79A-GFP fusion protein (see above), growing in suspension, were washed once with FACS buffer (PBS with 1% FBS), stained for 1 minute at RT in 1:1000 CellMask™ Deep Red Plasma Membrane Stain (ThermoFisher Scientific, catalog#: C10046) solution in FACS buffer, and washed once again with FACS buffer. 150,000 cells were re-suspended in 200  $\mu$ L of PBS per well of an 8-well coverslip bottom chamber slide (Nunc™ Lab-Tek™ II Chambered Coverglass, Thermo Scientific, catalog#: 155409) coated with poly-L-lysine (SigmaAldrich, catalog#: P4832-50ML). Chamber slides containing cell suspensions were centrifuged at 600 g for 10 minutes to promote cell attachment. The PBS was then gently exchanged for complete culture medium (see above) containing 1:100 ProLong™ Live Antifade Reagent (ThermoFisher Scientific, catalog#: P36975), and cells were returned to an incubator for 30 minutes at 37°C with 5% CO<sub>2</sub> until imaging. Super-resolution images were obtained using a structured illumination (SI) based DeltaVision OMX Blaze V4 Microscope (GE Healthcare Life Sciences) with UPLSAPO 100x (Olympus) objective, N = 1.514 immersion oil, and a 488 nm laser with 528/48 filter for GFP detection and a 642 nm laser with 683/40 filter for CellMask™ Deep Red plasma membrane stain detection. Z stack images were taken at the plane of contact of the cells with the coverglass  $\pm$  1.5  $\mu$ m using sequential SI mode with dual EMCCD cameras operated at 5 MHz and 170 gain, 512 x 512 image resolution, and 0.125  $\mu$ m section spacing. Acquired raw images were processed in softWoRx™ software (GE Healthcare Life Sciences) using OMX SI reconstruction algorithm. For the final image, 2-3 sections at the point of contact of the cells with the chamber bottom were merged in maximum intensity projection. Brightness levels were adjusted for each image individually using Adobe Photoshop. Videos with 3D projections were generated with softWoRx™ software. All images of the z-stacks were enhanced by the Local Contrast Enhancement tool and 3D reconstructions created by Volume Viewer tool, calculating 350 maximum intensity projections for 360° rotation. After brightness adjustment, maximum intensity projections were saved as AVI formatted videos with speed set at 18 frames per second.

## Förster resonance energy transfer (FRET)

To measure AKT activity directly, we used the FRET-based AKT activity reporter AktAR2 (Addgene plasmid #64932).<sup>19</sup> In brief, from N terminus to C terminus (Figure S2A), the reporter protein consists of: Cerulean3 (donor fluorescent protein); a phospho-amino acid (AA) binding domain from FHA1; a phosphorylation target sequence surrounding Thr-24 of FOXO1; and circularly permuted Venus (cpVenus[E172], acceptor fluorescent protein). AKT-mediated phosphorylation of the reporter causes binding of the FHA1 domain to the phosphorylated threonine, resulting in bending of the reporter that brings the fluorescent proteins in close proximity, increasing the FRET efficiency (*E*). As was done previously,<sup>20</sup> we added to the N terminus of AktAR2 the ten N-terminal AA from Lyn kinase, targeting Lyn-AktAR2 to lipid rafts through myristoylation and palmitoylation. As adjuncts to FRET determination, we created the following constructs expressing: Cerulean3 alone; cpVenus[E172] alone; C3-cpV (Cerulean3-cpVenus[E172]) as a fusion protein without a linker, serving as a maximum FRET control; C3-spacer-cpV, in which the FoxO1 phosphorylation site was replaced with a 230-AA TRAF2-derived spacer, as done before for a low-FRET control;<sup>21</sup> and a “Dead” Lyn-AktAR2, in which the FoxO1 Thr-24 was changed to a similar but unphosphorylatable residue (Val), serving as a baseline FRET control. For measurement of AKT activity in response to small molecule inhibitors, we used an improved version of the AKT activity reporter (Lyn-AktAR2-EV) in which a long flexible linker called “EV”<sup>22</sup> was inserted to lower the baseline FRET. The improved reporter was also used to measure AKT activity in cells modified to express the BCR at variable levels. Sequences of all constructs used for FRET-based detection of AKT activity are listed in the Sequences section below.

Cells were stably transfected to express the FRET constructs using the Sleeping Beauty transposon system.<sup>14</sup> Specifically, Lyn-AktAR2 and the above-mentioned constructs were inserted into the donor transposon plasmid pSBbi-Pur (Addgene plasmid #60523<sup>14</sup>), and 9  $\mu$ g of each transposon plasmid was electroporated together with 5  $\mu$ g of the transposase plasmid pCMV(CAT)T7-SB100 (Addgene plasmid #34879<sup>23</sup>) per 1.2 million cells, resuspended in appropriate buffer (see above). Cells were consequently selected for integration by puromycin at a final concentration of 2  $\mu$ g/mL.

To measure the change in FRET efficiency (*E*) with BCR KO, indicating its effect on AKT activity, we knocked out the BCR in cells stably expressing the Lyn-AktAR2 reporter by CRISPR/Cas9 methods as described above. *E* was determined in BCR-negative cells (as identified by staining using fluorescently labeled antibody, see below) in mixed cultures after BCR targeting, and compared to the *E* of BCR-expressing cells. We found that staining for BCR expression, even with Fab’ fragment antibodies, increased the *E* level (data not shown); therefore, the *E* of BCR-expressing cells was determined in parallel unstained cultures after electroporation with gRNA/Cas9 plasmids targeting the HVR of a different cell line.

*E* was measured in live cells by two methods, fluorescent microscopy and FCM, at 5 days after electroporation to achieve BCR KO. For fluorescent microscopy, mixed cultures of BCR-positive and BCR-KO Lyn-AktAR2-expressing cells were stained with non-crosslinking anti-IgG Fab’ or anti-IgM Fab’ fragment antibody (see table in Flow cytometry, image cytometry, and cell sorting section of Supplemental Methods) by the same methodology as for FCM staining (see above), to allow identification of BCR-negative cells. Cells after staining, as well as all cells expressing adjunct constructs (which went through the same staining procedure but without antibody), were then attached to 8-well coverslip-bottom chamber slides as described above, and incubated for one hour at 37°C with 5% CO<sub>2</sub> until imaging. Fluorescent microscopy for FRET was done according to the “3-filter cube”

methodology developed by Zal and Gascoigne<sup>24</sup> using a DeltaVision OMX Blaze V4 Structured Illumination Microscope (GE Healthcare Life Sciences) with a 60x TIRF oil objective (Olympus) in the widefield mixed-FRET mode with dual electron multiplied charge-coupled device (EMCCD) cameras operated without EMCCD gain. We used excitation with a 445 nm laser with 478/35 filter to measure donor fluorescence with donor excitation ( $I_{DD}$ , donor channel), excitation with a 445 nm laser with 541/22 filter to measure acceptor emission with donor excitation ( $I_{DA}$ , FRET channel), and excitation with 514 nm laser with 541/22 filter to measure acceptor emission with acceptor excitation ( $I_{AA}$ , acceptor channel). Exposure times were 200-400 ms, always the same for all channels for one cell image. Single images through the middle of cells were used to calculate mean fluorescent intensities for each cell and channel using softWoRx™ software (GE Healthcare Life Sciences). For each cell, a region of background was defined in the image and subtracted from the measured intensities. The cpVenus[E172] and Cerulean3 single-color constructs were used to calculate the a and d channel cross-talk coefficients, respectively. The C3-cpV construct of maximal FRET was used to calculate the G factor by the acceptor photobleaching method.<sup>24</sup> Each coefficient was calculated as the average of at least 10 measurements. Average values of the individual coefficients were:  $d = 0.282$  ( $SD = 0.9253 \times 10^{-3}$ ),  $a = 0.1283$  ( $SD = 4.697 \times 10^{-3}$ ), and  $G = 1.0205$  ( $SD = 0.181$ ).

For  $E$  determination by FCM, mixed cultures of BCR-positive and BCR-KO cells were re-suspended in complete culture medium (see above) containing a final dilution of anti-IgG or anti-IgM Fab' fragment antibody (see table in Flow cytometry, image cytometry, and cell sorting section of Supplemental Methods) and incubated for 20 minutes at 37°C with 5% CO<sub>2</sub> or until FCM analysis. All cells expressing adjunct constructs went through the same procedure without antibody. Our approach to  $E$  determination by FCM was adapted from methods developed by Chen et al.,<sup>25</sup> in which calculation of the G factor is based on a pair of FRET reporters with identical fluorophores but differing highly in FRET efficiency due to differences in proximity of the fluorophores. Our C3-cpV and C3-spacer-cpV constructs provided maximum and minimal FRET controls, respectively. Filter settings on the LSR Fortessa flow cytometer (BD Biosciences) used for FRET were as follows: excitation with a 405 nm laser with 450/50 filter for  $I_{DD}$  measurement, excitation with a 405 nm laser with 525/50 filter for  $I_{DA}$  measurement, and excitation with a 488 laser with 530/30 filter for  $I_{AA}$  measurement. For each cell line, non-fluorescent unmodified cells were used to measure autofluorescence, providing average values for each channel to be subtracted from corresponding intensity values obtained for reporter-expressing cells. Cells expressing cpVenus[E172] alone were used to measure the a and b coefficients, and cells expressing Cerulean3 alone were used to measure the c and d coefficients. To calculate coefficients, only cells with fluorescent protein expression levels in the higher half of expression intensity were used, and linear regression was used to calculate the coefficient values. Similarly, cells with higher expression of the C3-cpV and C3-spacer-cpV constructs were used to calculate the G value. Average values of sensitized acceptor emissions ( $F_c$ ) and corrected  $I_{DD}$  and  $I_{AA}$  intensities were used for final calculation of the G factor.<sup>25</sup> All constants were separately measured for each experiment. Coefficient values from a representative experiment were:  $a = 7.718 \times 10^{-3}$  (standard error =  $0.179 \times 10^{-3}$ ),  $b = 0$ ,  $c = 11.102 \times 10^{-3}$  (standard error =  $0.171 \times 10^{-3}$ ),  $d = 0.982$  (standard error =  $1.597 \times 10^{-3}$ ), and  $G = 1.719$ . From the experimental data, an  $E$  value was calculated for each cell, and values for all cells of a particular line, reporter, and condition were plotted as a moving median of  $E$  versus corrected  $I_{DD}$  ( $I_{dd}$ ) (Figure S2E). For comparing BCR-positive and BCR-KO cells of the same cell line, a single average overall  $E$  value for each condition was calculated from cells in the same range of donor emission intensities, with all parts of the range having enough cells to generate a consistent moving average. For each cell line, data points in the very low range of donor emission intensities (usually  $I_{dd}$  below 2000) were excluded, because of non-robust  $E$  values at low fluorescence intensities.

### Gene expression profiling (GEP)

BCR KO cells were isolated as described above for Western blotting. For cell lines with little effect on growth of BCR KO, such that stable BCR negative cultures were created, the parental lines were used as controls. Total RNA was isolated from harvested cells with the RNAqueous Total RNA Isolation Kit (Thermo Scientific, catalog#: AM1912). Subsequent RNA quality assessment, generation of biotinylated aRNA for hybridization on Illumina HT-12 BeadArrays (Illumina, Inc., San Diego, CA), and data processing was as previously described.<sup>26</sup> Data from microarray studies are submitted to Gene Expression Omnibus as GSE80615. Values for probes expressed above background in at least 10% of samples were used for heat mapping and correlation analysis. After log<sub>2</sub> transformation and mean centering, heat maps showed good agreement between replicates as to the effect of BCR KO on gene expression, even though the replicates for BCR KO used different gRNA sequences. Therefore, for each line, log<sub>2</sub> values for each probe were averaged to give a single value for each state (BCR KO or Control), and then subtracted to give a log<sub>2</sub> value for the fold-change in gene expression caused by BCR KO. Using data from 10 GCB-DLBCL lines, an r value was calculated for each gene probe of the Pearson correlation between the change in log<sub>2</sub> gene expression caused by BCR KO and the relative proliferation after BCR KO; this correlation for the HRK gene is illustrated in Figure 3A. For each gene probe, a metric of correlation between change in gene expression and change in proliferation after BCR KO was then based on this r value as follows:

$$\text{correlation metric} = \text{sign}(r) \times \frac{\text{variance}(\text{gene expression change})}{\text{abs}(\log_2(\text{abs}(r)))}$$

Absolute values of the correlation metric, which is positive or negative according to the r value, increase with increasing variance in the change in gene expression, and with increasing correlation (r values approaching 1 or -1) between gene expression change

and proliferation change, potentially selecting for genes with both large change and high correlation. Probe-averaged gene values for this correlation metric were then used to rank genes to perform Gene Set Enrichment Analysis (GSEA),<sup>27</sup> using a custom collection of gene sets from the scientific literature, as well as gene sets in the C2, C3, C5, and C6 categories in the Molecular Signatures Database (MSigDB) web service release version 3.84.

**SUPPLEMENTAL TABLE****Table S1. Relative proliferation of GCB-DLBCL cell lines after BCR KO**

Slopes of absolute growth curves of BCR-KO and BCR-replete cells of each line yield a ratio (BCR-KO/BCR-replete) quantifying the relative proliferation of BCR-KO cells. The order of cell lines, from top to bottom, is those most affected by BCR KO to those least affected.

| <b>Cell line</b> | <b>Relative proliferation</b> | <b>IgH isotype</b> | <b>IgL isotype</b> |
|------------------|-------------------------------|--------------------|--------------------|
| SUDHL-4          | -0.0322                       | G4                 | K                  |
| SUDHL-6          | 0.430746                      | M                  | K                  |
| OCI-Ly7          | 0.455293                      | M                  | K                  |
| Pfeiffer         | 0.648559                      | G                  | K                  |
| OCI-Ly19         | 0.727581                      | M                  | K                  |
| OCI-Ly18         | 0.735202                      | M                  | not expressed      |
| SUDHL-7          | 0.904983                      | G                  | K                  |
| OCI-Ly8          | 0.912752                      | M                  | L                  |
| DB               | 0.939476                      | G                  | L                  |
| SUDHL-10         | 0.941596                      | G                  | L                  |

## SUPPLEMENTAL FIGURES

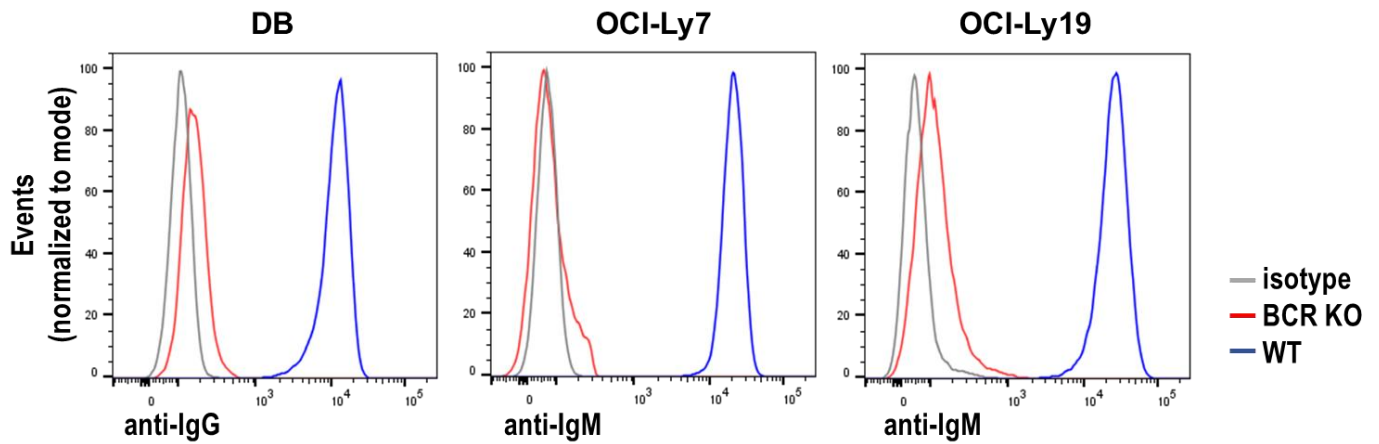

**Figure S1. Targeting of IgH reduces surface BCR to undetectable levels**

Viable cultured cells from three representative GCB-DLBCL cell lines were assessed by flow cytometry for surface binding of goat fluorescent antibody, either specific for the IgH isotype expressed by the particular cell line (WT or BCR KO) or a non-specific antibody of the same goat isotype (isotype). For each cell line, cultures were either unmodified cells (WT and isotype) or had undergone BCR KO at least 10 days earlier, followed by flow cytometric sorting to eliminate unmodified cells and further culture.



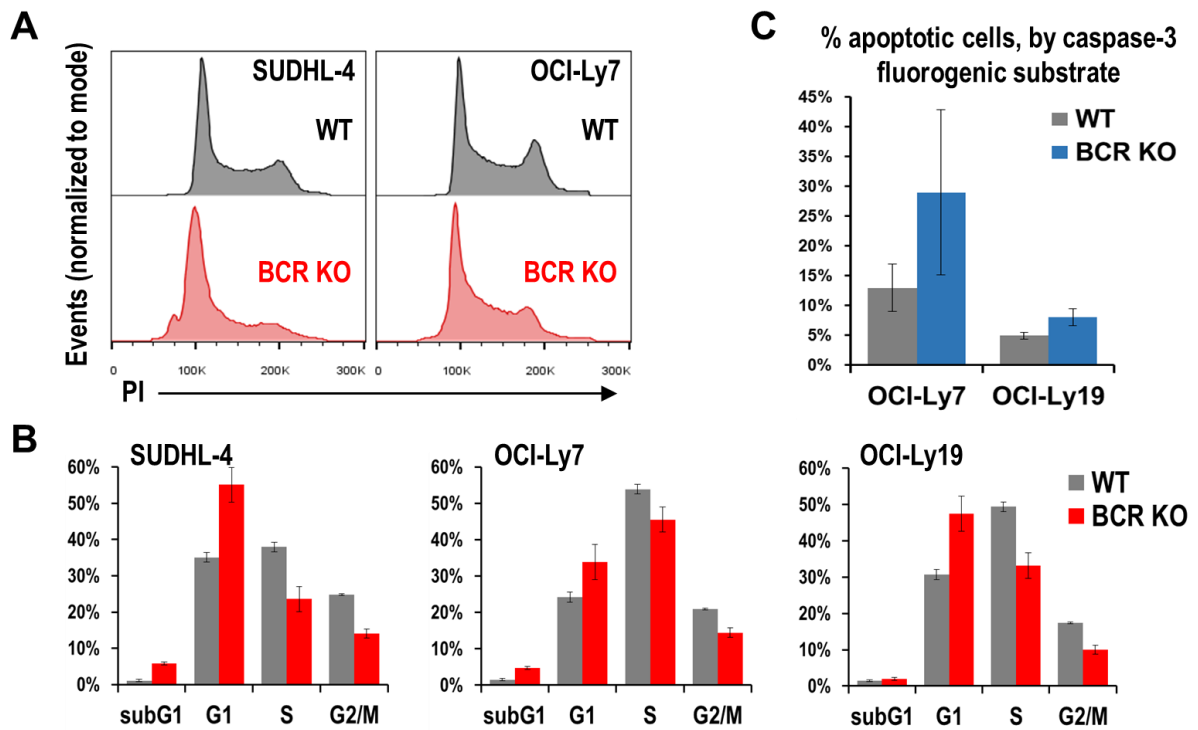

**Figure S2. BCR KO reduces proliferation and can induce apoptosis in GCB-DLBCL lines**

(A) Effect of BCR KO (via targeting of IgH) in two GCB-DLBCL lines on histograms of DNA content, based on propidium iodide staining and flow cytometry.

(B) Effect of BCR KO on proportions of cells of 3 GCB-DLBCL lines in active cell-cycle phases or apoptosis (sub-G1), based on propidium iodide staining for DNA content. The mean  $\pm$  s.d. from 3 (OCI-Ly7), 4 (OCI-Ly19), and 6 (SUDHL-4) biological replicates is displayed.

(C) Effect of BCR KO on proportions of apoptotic cells of two GCB-DLBCL lines, based on flow cytometry with a caspase-3 fluorogenic substrate. The mean  $\pm$  s.d. from 3 biological replicates is displayed.

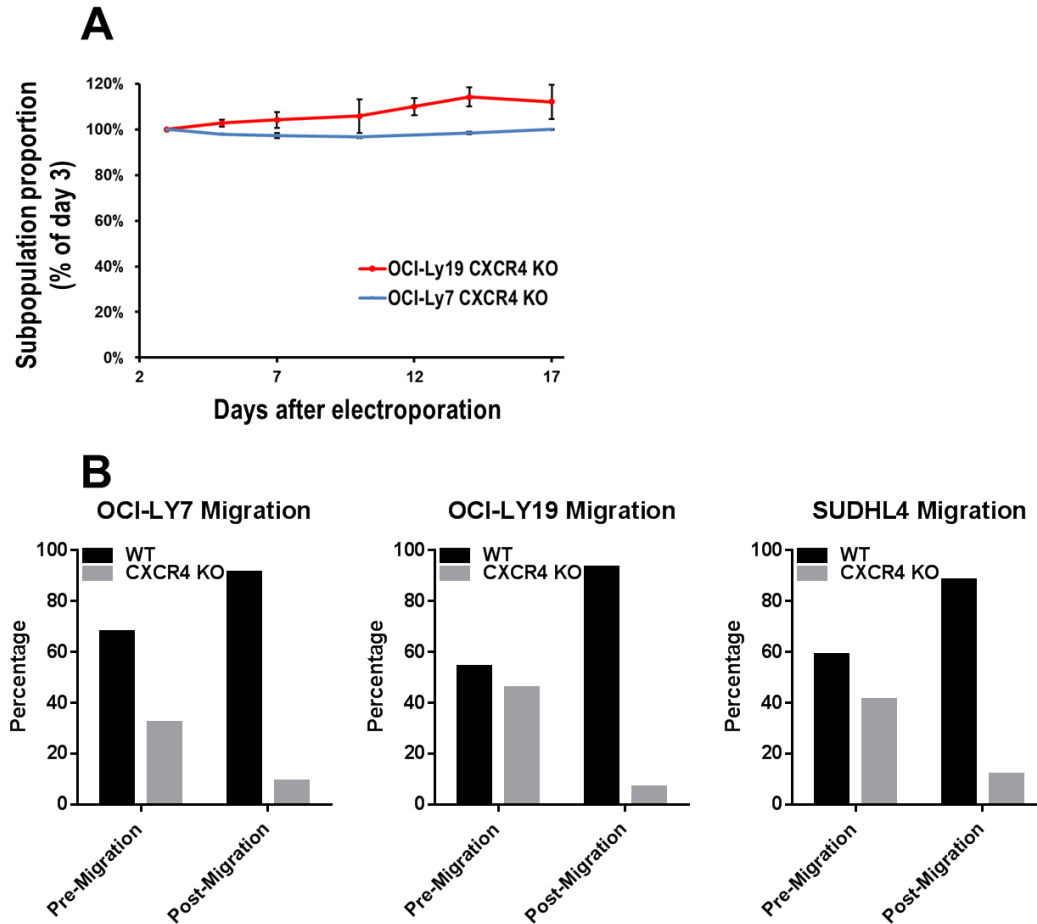

**Figure S3. CXCR4 KO in GCB-DLBCL lines affects chemotaxis but not proliferation.**

(A) The proportion of CXCR4 KO cells in mixed cultures (KO and unmodified cells) for 2 GCB-DLBCL lines, normalized to its initial value (determined 3 days after electroporation), is stable over time.

(B) The 3 GCB-DLBCL lines shown underwent KO of CXCR4, creating mixed cultures of WT and CXCR4 KO cells, whose relative proportions (determined by flow cytometry for CXCR4 surface expression) are shown as “Pre-Migration”. Aliquots of these cultures were then placed in the upper insert of a 24-well Transwell plate, for challenge by chemotaxis to a CXCL12 gradient through a 5  $\mu$ m pore-size filter. After 6 hours, cells in the lower chamber (“Post-Migration”) were examined by flow cytometry for surface CXCR4 expression. The increase in relative proportion of WT cells post-migration provides functional confirmation of the loss of CXCR4 in CXCR4 KO cells.

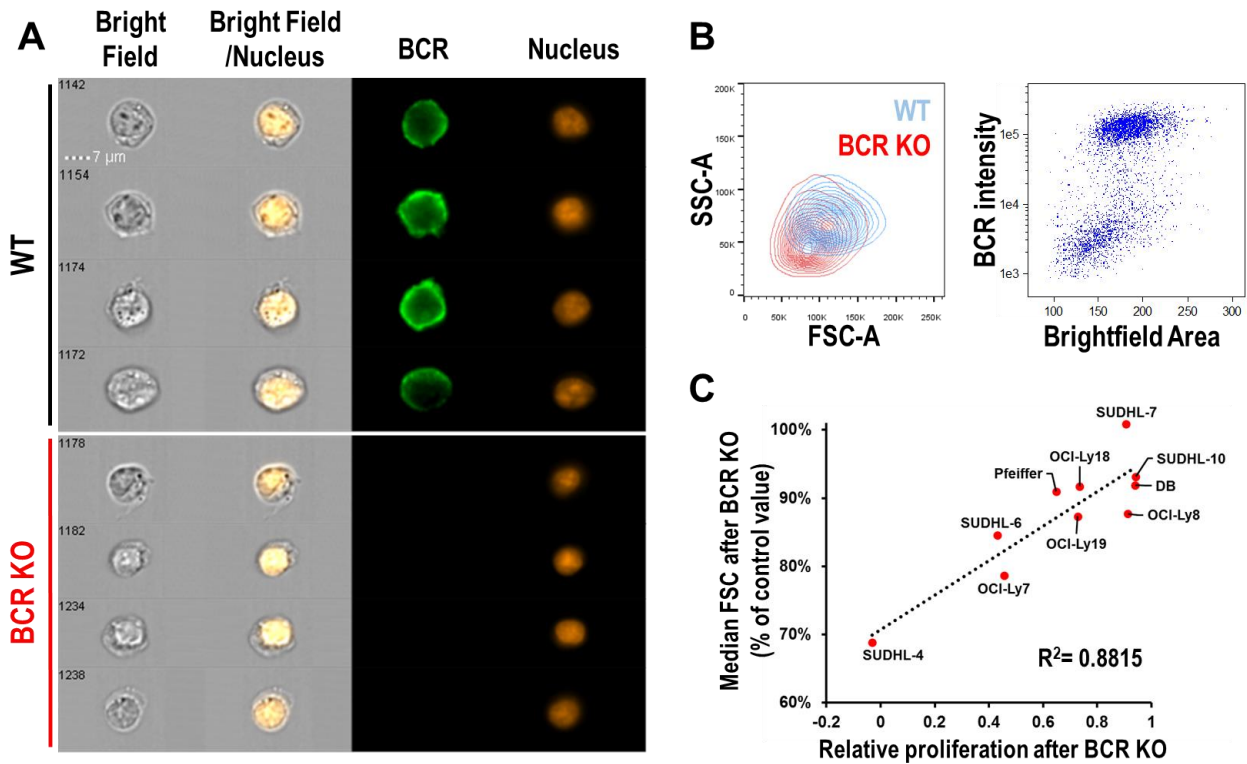

**Figure S4. BCR KO reduces cell size in GCB-DLBCL lines**

(A) Individual representative images of cells of the GCB-DLBCL line SUDHL-4, detected with an ImageStream image cytometer, showing reduced size of BCR-KO cells. Cells were stained with FITC labeled antibody to IgM (BCR) and then fixed, permeabilized, and stained with propidium iodide.

(B) Aggregate measures of SUDHL-4 cell size by flow cytometry (left panel; FSC = forward scatter; SSC = side scatter) or image cytometry (right panel) according to BCR status.

(C) Correlation between BCR KO-induced reductions in proliferation and cell size, reflected by forward scatter (FSC), of GCB-DLBCL lines. The average of FSC median values from 2-3 biological replicates, each performed with a different IgH-targeting gRNA, is shown for each line.

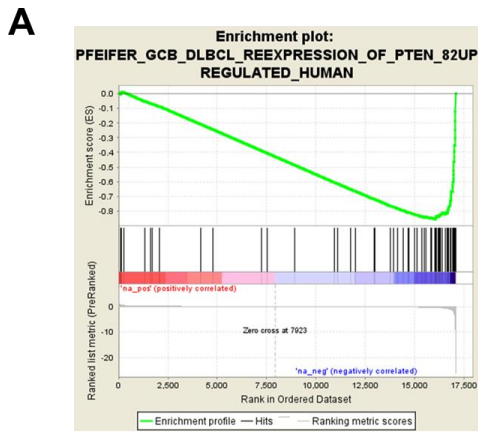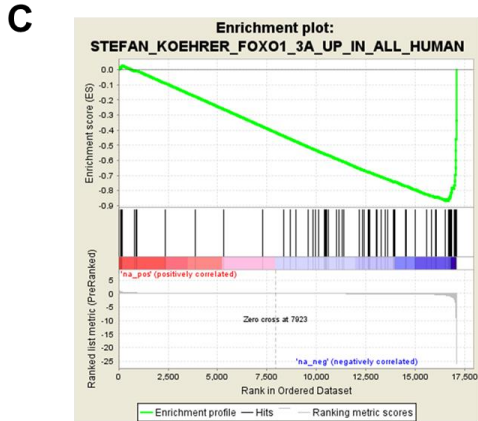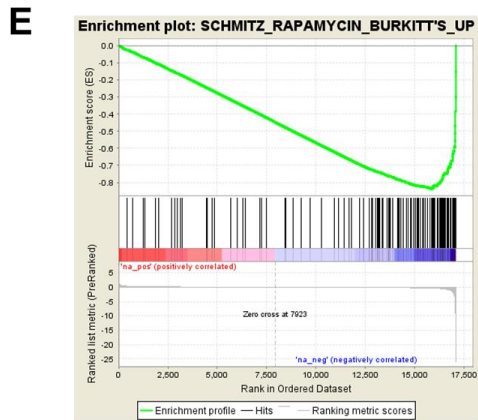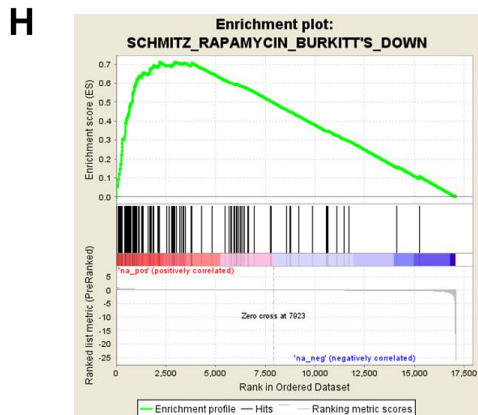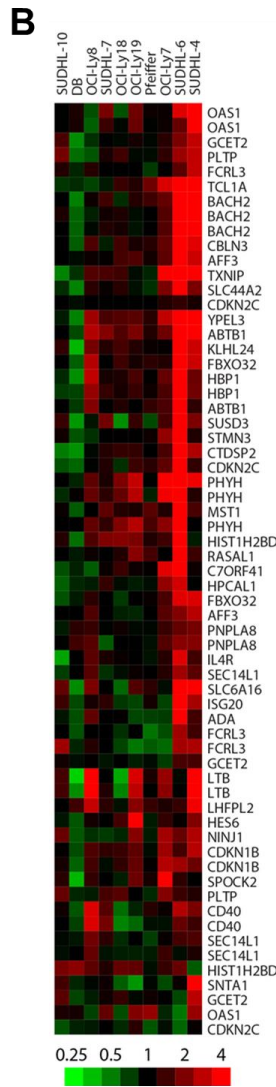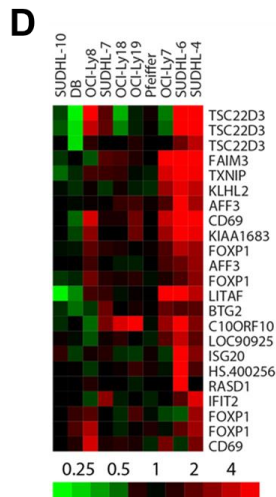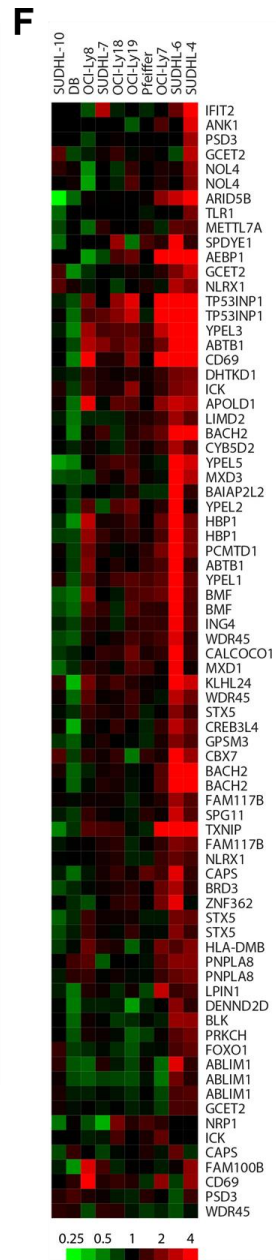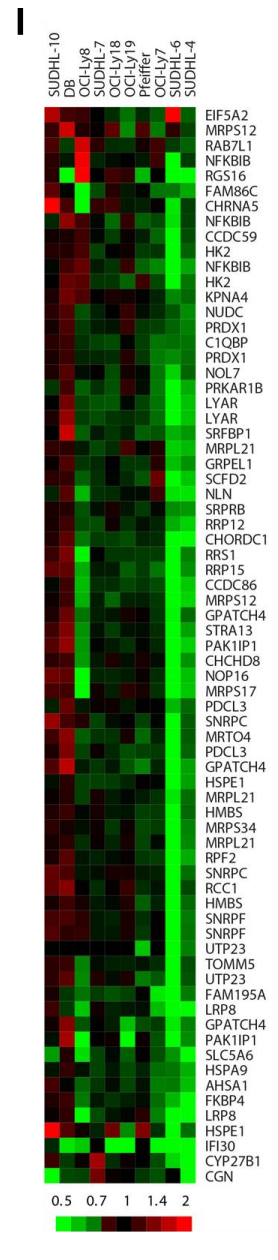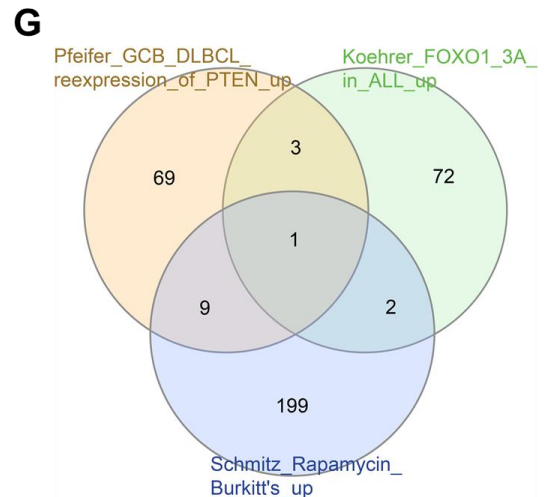

**Figure S5. Gene set enrichment analysis (GSEA) indicates that effects of BCR KO correlate with reduced AKT activity**

(A) Applied to genes ranked by correlation between BCR KO-induced changes in expression and relative proliferation in 10 GCB-DLBCL lines, GSEA enriched a set of 82 genes upregulated by the forced expression of PTEN in HT, a GCB-DLBCL line lacking PTEN protein expression. Shown is the enrichment plot (FDR = 0.008).

(B) Subtracted heat map of gene expression changes caused by BCR KO in GCB-DLBCL lines, arranged by BCR KO-induced growth reduction (left, least; right, most), for the 40 core genes of the gene set in (A). Results are based on 3-4 BCR KO replicates, each using a different IgH-targeting gRNA. The color bar shows fold-change.

(C) GSEA enrichment plot (FDR = 0.002) for 78 genes upregulated in RCH-ACV (a cell line expressing a pre-BCR) by a non-phosphorylatable mutant form of FOXO1, which avoids inhibition by AKT.

(D) Subtracted heat map for the 17 core genes of the gene set in (C).

(E) GSEA enrichment plot (FDR = 0.004) for 211 genes upregulated in Burkitt's lymphoma cell lines treated with rapamycin.

(F) Subtracted heat map for the 54 core genes of the gene set in (E).

(G) Venn diagram<sup>28</sup> showing overlap of the 3 gene sets used for (A)-(F).

(H) GSEA enrichment plot (FDR = 0.000) for 133 genes downregulated in Burkitt's lymphoma cell lines treated with rapamycin.

(I) Subtracted heat map for the 53 core genes of the gene set in (H).

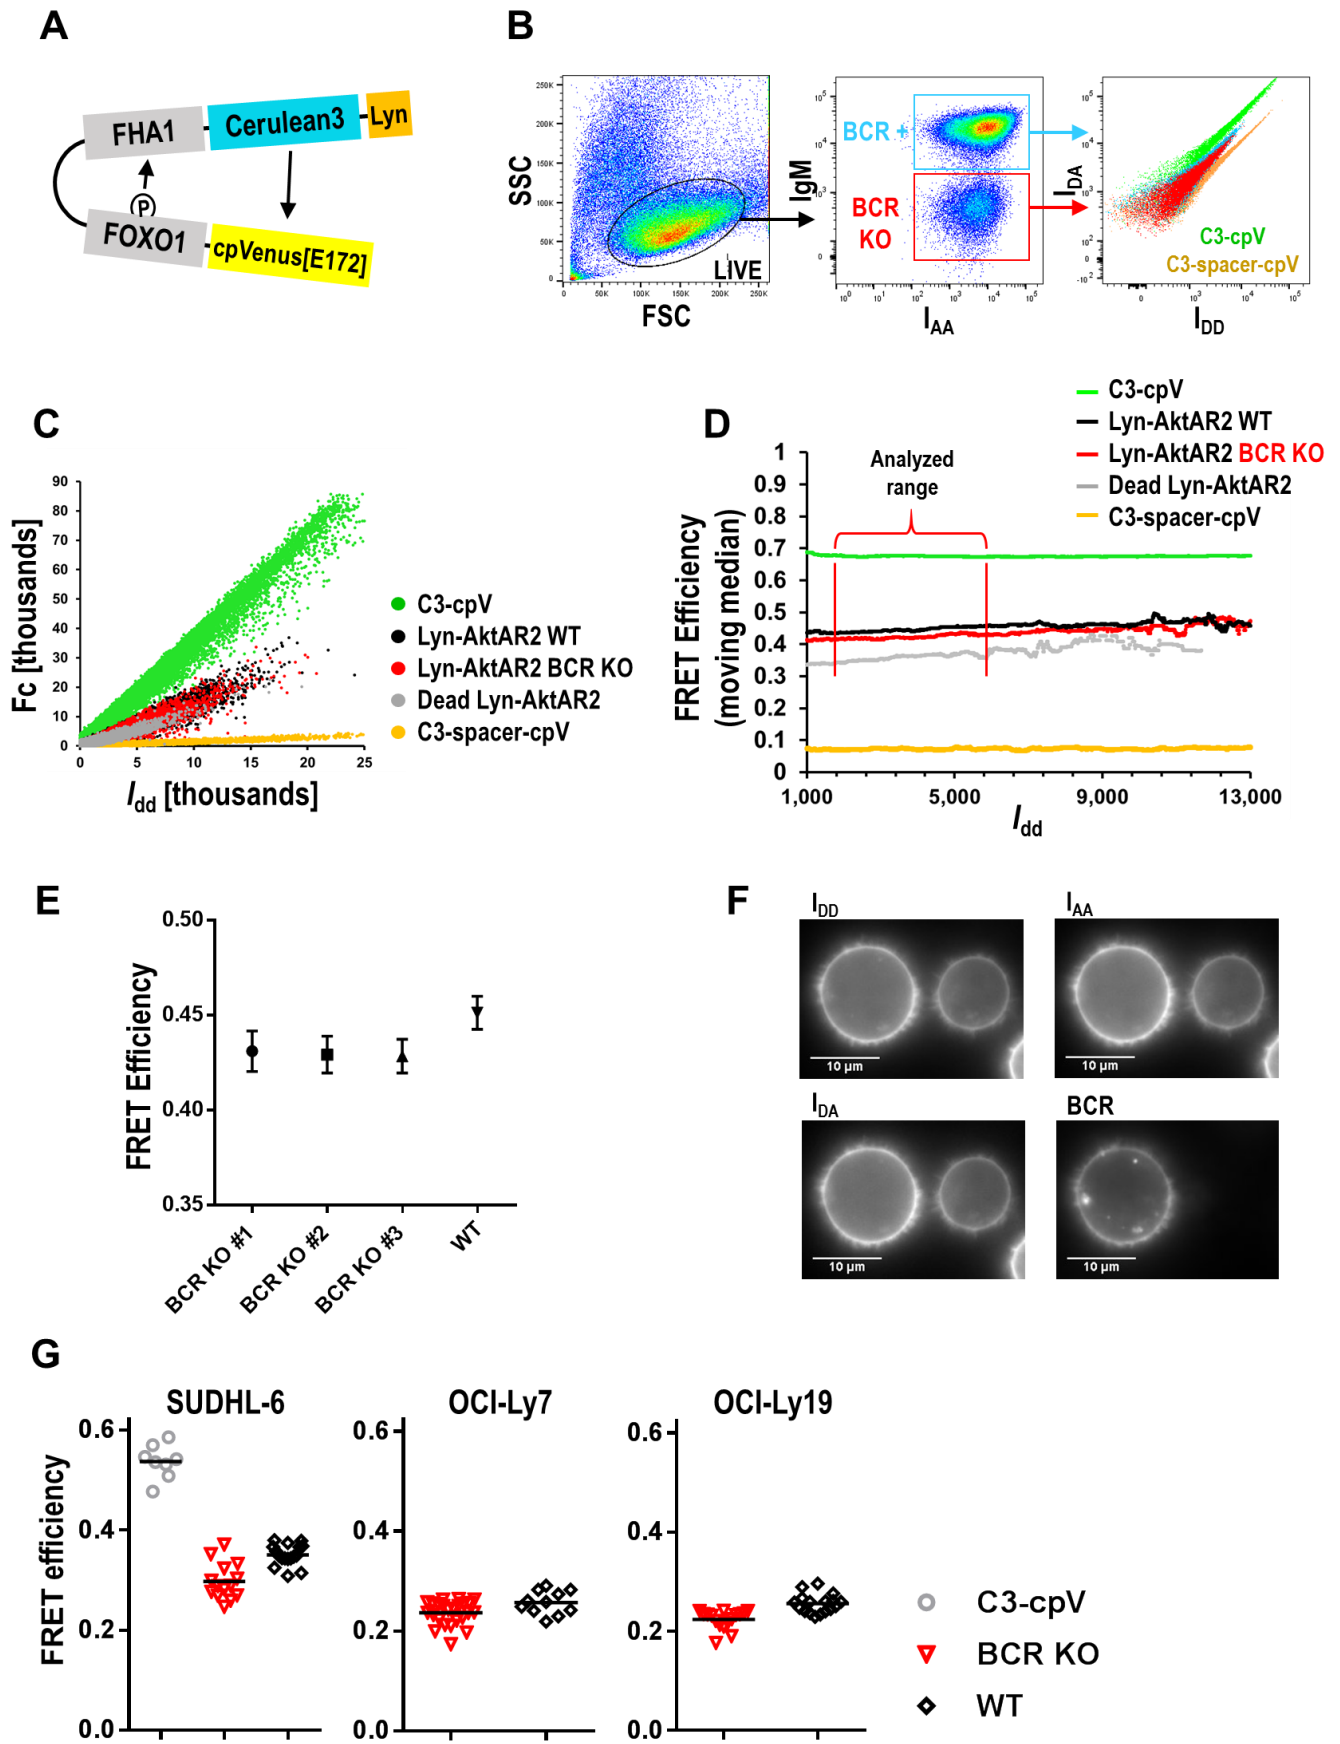

**Figure S6. Effect of BCR KO on AKT activity in GCB-DLBCL lines**

- (A) Lyn-AktAR2 reporter schematic. The N-terminal domain from LYN mediates plasma membrane localization. Phosphorylation of the AKT target site from FOXO1 induces binding by the FHA1 domain, bringing Cerulean3 (donor) and cpVenus[E172] (acceptor) fluorescent proteins closer.
- (B) Uncompensated flow cytometry data and gating strategy for OCI-Ly7 cells stably expressing Lyn-AktAR2, 5 days post-electroporation for BCR KO. FRET ( $I_{DA}$  versus  $I_{DD}$ ) of Lyn-AktAR2, between high (C3-CpV) and low (C3-spacer-cpV) control constructs, is slightly lower in BCR-KO than WT cells.
- (C) Sensitized acceptor emission ( $F_c$ ) versus corrected donor emission ( $I_{dd}$ ) in OCI-Ly7 cells expressing FRET control constructs, Lyn-AktAR2-expressing WT or BCR-KO SUDHL-6 cells 5 days post-electroporation, and SUDHL-6 cells expressing non-phosphorylatable (Dead) form of Lyn-AktAR2.
- (D) Moving median of per-cell  $E$  value versus  $I_{dd}$  for same cells as in (C). The average of moving median values of  $E$  ( $E_{ave}$ ) was determined in the marked region.
- (E)  $E_{ave}$  (+/- standard deviation) of BCR-replete (WT) and BCR-KO (3 biological replicates) Lyn-AktAR2-expressing SUDHL-6 cells 5 days post-electroporation.
- (F) OCI-Ly7 cells (BCR-replete, left; BCR-KO, right) 5 days post-electroporation show Lyn-AktAR2 donor emission after donor excitation ( $I_{DD}$ ), acceptor emission after acceptor excitation ( $I_{AA}$ ), acceptor emission after donor excitation ( $I_{DA}$ ), and surface BCR (BCR) detected with red fluorescence-emitting anti-IgM.
- (G) FRET efficiency ( $E$ ) from microscopy of Lyn-AktAR2-expressing single cells of 3 GCB-DLBCL cell lines (horizontal line = mean), either BCR-replete (WT) or with BCR KO. C3-cpV is a high-FRET control construct with Cerulean3 fused directly to cpVenus[E172].



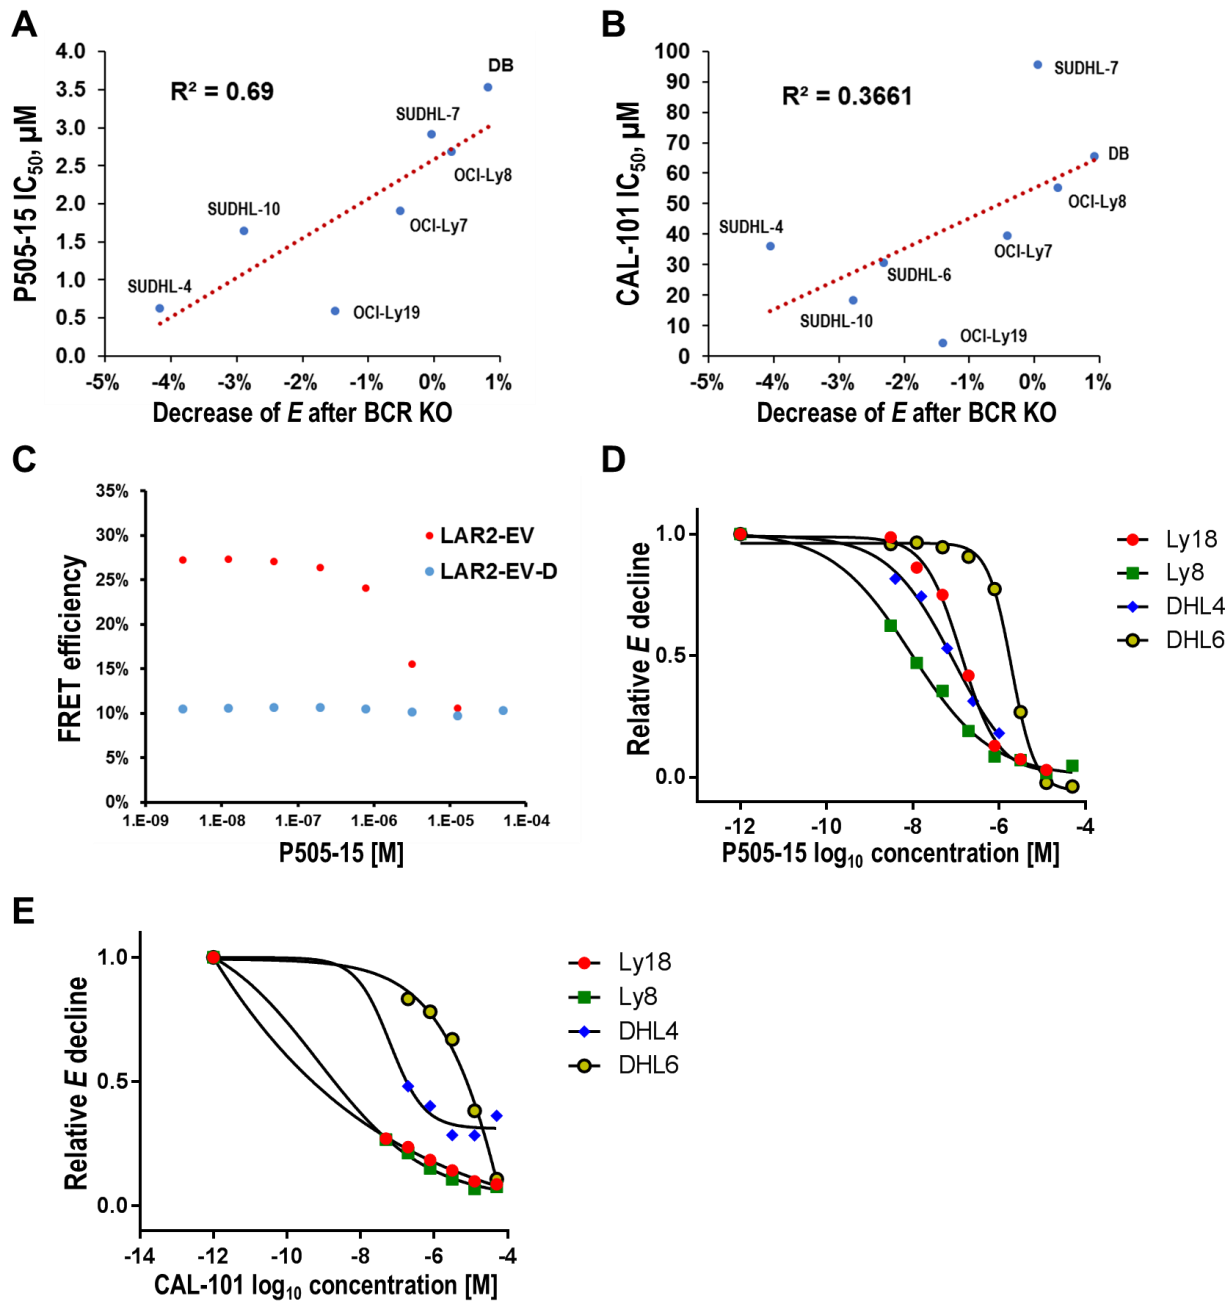

**Figure S7. Measures of effect on AKT activity in GCB-DLBCL lines on inhibitors of tonic BCR signal transmission**

(A) Correlation between sensitivity of GCB-DLBCL lines to a small-molecule SYK inhibitor P505-15,<sup>29</sup> determined by CellTiter-Glo viability assays, and the BCR KO-induced reduction in AKT activity, as measured by percentage decrease of  $E$  with the Lyn-AktAR2 reporter.

(B) Correlation between sensitivity of GCB-DLBCL lines to CAL-101, a small-molecule inhibitor of the PI3K p110 $\delta$  isoform,<sup>30</sup> and the BCR KO-induced reduction in AKT activity, as measured by percentage decrease of  $E$ .

(C) Dose-response curves of FRET efficiency, for linker-enhanced versions of the “live” (phosphorylatable) and “dead” (non-phosphorylatable) forms of the Lyn-AktAR2 reporter, in SUDHL-6 cells treated for 1 hour with SYK inhibitor P505-15. AKT activity measured by the live reporter is inhibited by increasing concentrations of P505-15, without a change in FRET efficiency of the dead reporter.

(D) Dose-response curves for inhibition of AKT activity by 1 hour treatment of 4 GCB-DLBCL lines with SYK inhibitor P505-15. Values are normalized to 100% of the baseline difference for each line in FRET efficiency between the linker-enhanced live and dead Lyn-AktAR2 reporters.



(E) Dose-response curves for inhibition of AKT activity by 1 hour treatment of 4 GCB-DLBCL lines with PI3K p110 $\delta$  isoform inhibitor idelalisib. Values are normalized as in (D).

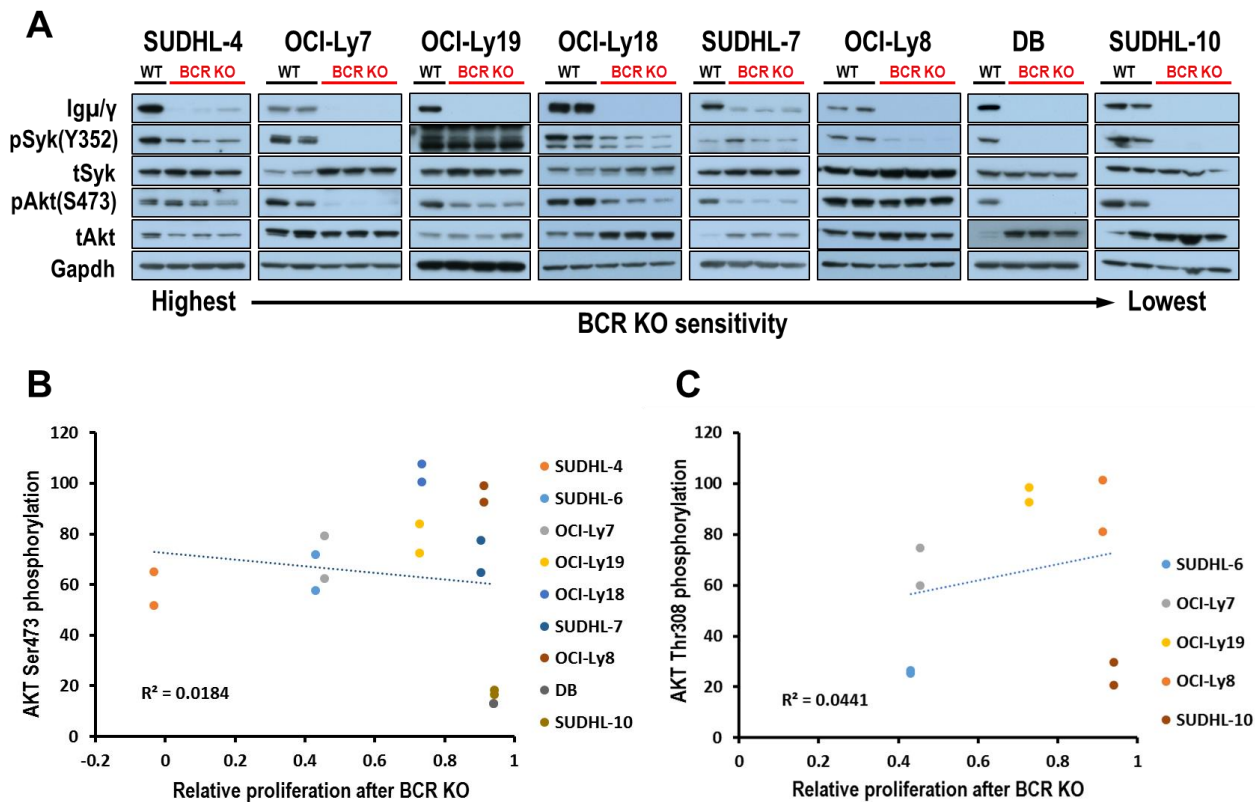

**Figure S8. BCR KO reduces AKT phosphorylation, but to a degree not well correlated with BCR KO-induced reduction in proliferation**

(A) Western blot for abundance and phosphorylation of BCR-relevant proteins in GCB-DLBCL lines after BCR KO. BCR KO replicates used different IgH-targeting gRNAs. Lines are arranged by effect of BCR KO on proliferation (left, most; right, least).

(B) Electrochemiluminescence assay for AKT Ser473 phosphorylation (pSer473) was performed on protein lysates, balanced for total protein content, from unmodified (WT) and BCR KO cells of 9 GCB-DLBCL lines. Results are displayed for BCR KO cells assayed in duplicate, normalized to the pSer473 value of WT cells from the same line and correlated with the effect of BCR KO on relative proliferation in that line.

(C) Results of electrochemiluminescence assay for AKT Thr308 phosphorylation, performed and displayed similarly to (B). Lines in (B) not included in (C) did not have detectable signal for pThr308.

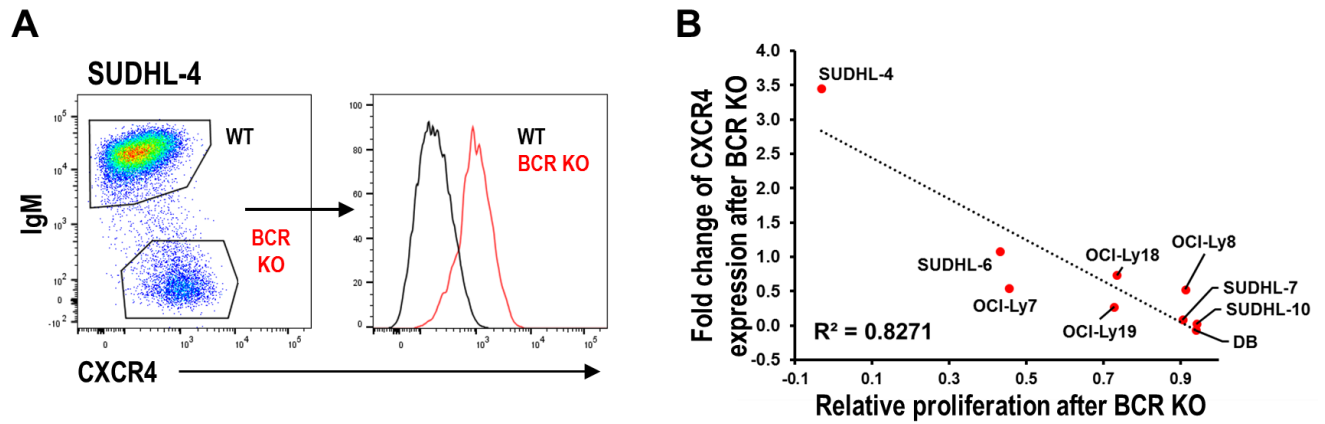

**Figure S9. Upregulation of surface CXCR4 by BCR KO correlates with BCR KO-induced reduction in proliferation**

(A) CXCR4 surface levels in SUDHL-4 cell line 5 days after electroporation for BCR KO.

(B) Correlation in GCB-DLBCL lines between BCR KO-induced relative proliferation and upregulation of CXCR4 surface expression 5 days after electroporation for BCR KO. Results are the average of 2 (CXCR4) and 3 (proliferation) biological replicates with different IgH-targeting gRNAs.

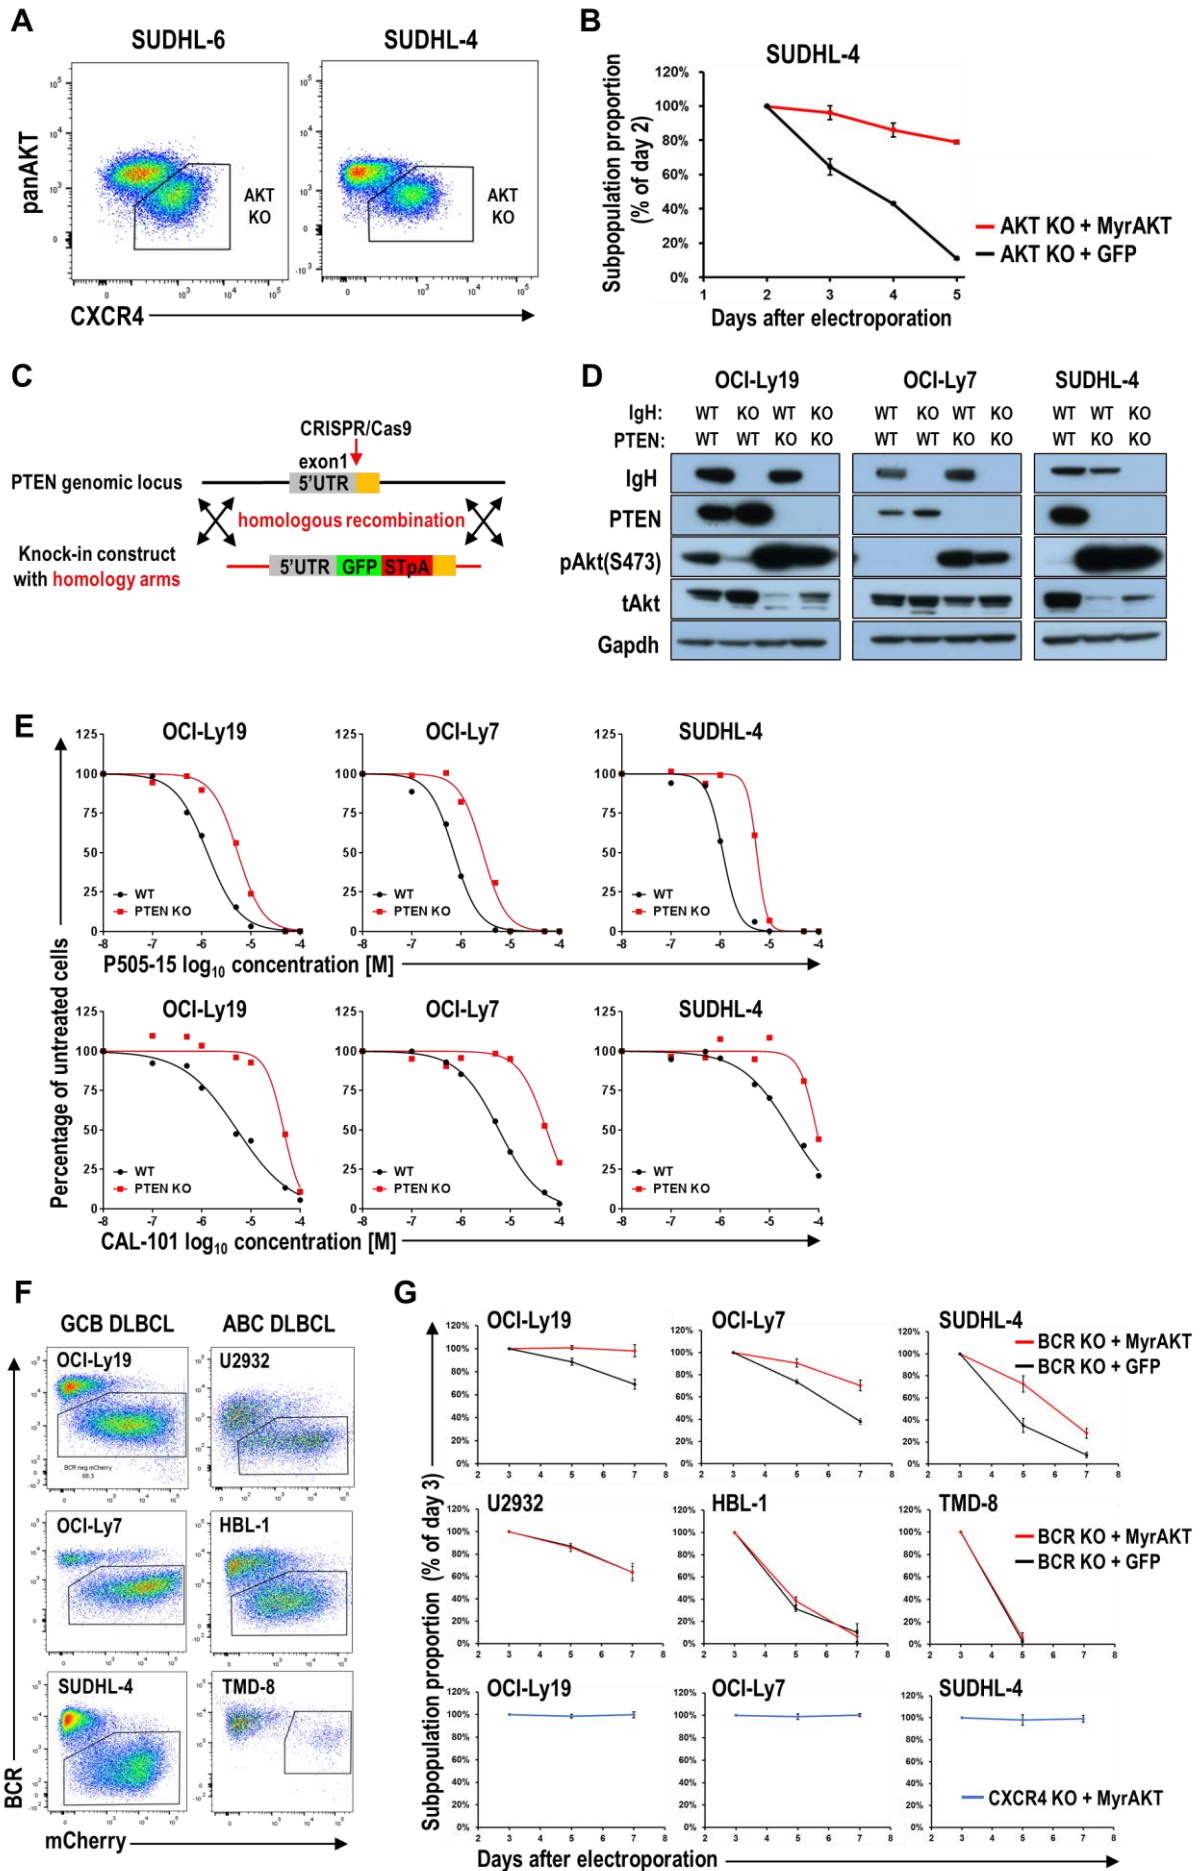

**Figure S10. Manipulations showing role of BCR signaling and AKT in GCB-DLBCL lines**

- (A) Flow cytometry of GCB-DLBCL lines 3 days post-electroporation with plasmids targeting all 3 AKT genes shows CXCR4 upregulation in AKT-KO cells.
- (B) Constitutively-active murine AKT1 (MyrAKT, co-expressed with mCherry) rescues SUDHL-4 cells from effect of AKT KO (shown in Figure 3C), but cells expressing GFP alone undergo rapid decline. Mean  $\pm$  s.d. from 3 biological replicates is displayed.
- (C) Schematic of “gene trapping” KO of PTEN by knock-in of a reporter cDNA (GFP) ending with a stop codon followed by a polyA signal sequence (STpA).
- (D) Western blots showing effects of KO of IgH and/or PTEN in 3 GCB-DLBCL lines. BCR KO was too rapidly toxic in SUDHL-4 for isolation of BCR-KO cells.
- (E) Effect of PTEN KO on sensitivity of GCB-DLBCL lines to small-molecule inhibitors of SYK (P505-15) and the PI3K p110 $\delta$  isoform (CAL-101).
- (F) Flow cytometric measurement of mCherry (indicating co-expression of MyrAKT) and surface BCR, 3 days post-electroporation of mCherry-2A-MyrAKT and CRISPR/Cas9 IgH-targeting plasmids. mCherry expression is largely confined to BCR-KO cells and high in all DLBCL lines.
- (G) Proportion over time of BCR-KO cells also expressing a marker (mCherry, indicating co-expression of MyrAKT, or GFP alone) from a co-transfected plasmid, normalized to its initial value 3 days post-electroporation, in GCB-DLBCL (top panels) and ABC-DLBCL lines (middle panels). Bottom panels show proportion over time of CXCR4-KO cells also expressing MyrAKT in 3 GCB-DLBCL lines. Growth advantage (rescue) by MyrAKT is restricted to BCR-KO GCB-DLBCL lines. Mean  $\pm$  s.d. from 3 biological replicates (each with a different gRNA) is displayed.

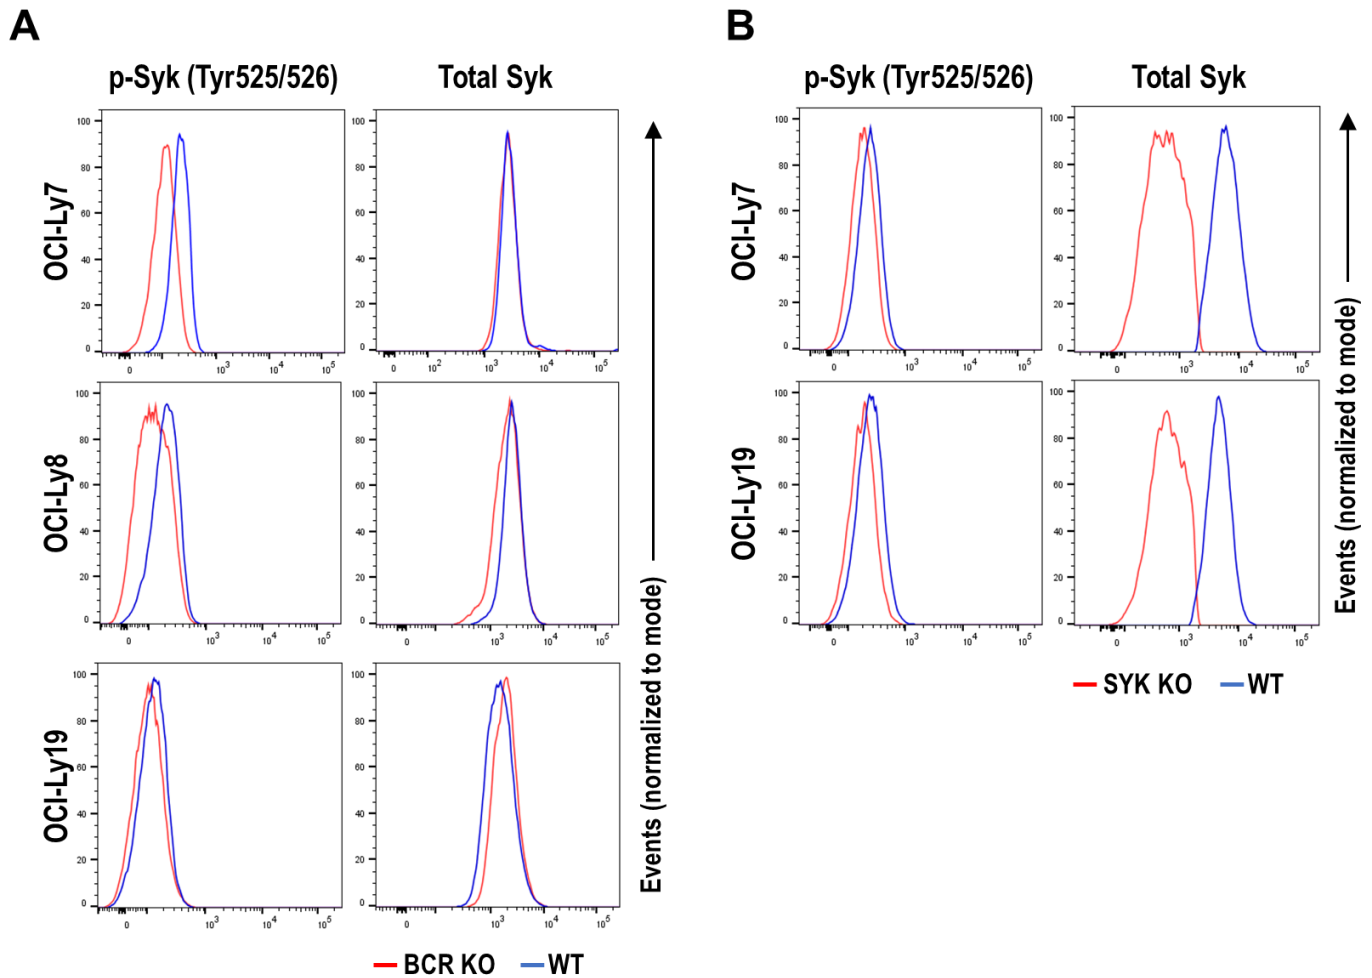

**Figure S11. Effect of BCR KO on SYK autophosphorylation sites Y525/Y526**

(A) Viable cultured cells from three representative GCB-DLBCL cell lines were assessed by flow cytometry in mixed cultures of unmodified (BCR-positive) and BCR-KO cells, after fixation and permeabilization, for BCR expression, total SYK content, or the level of phosphorylation of SYK (p-Syk) at residues Y525/Y526, a site of autophosphorylation.<sup>31</sup> For OCI-Ly7, aliquots from separate cultures of stably-growing unmodified and BCR-KO cells were mixed; for OCI-Ly8 and OCI-Ly19, cells were analyzed 5 days after electroporation to create BCR-KO cells (by IgH targeting), producing mixed cultures of unmodified (BCR-positive) and BCR KO cells. For each line, results for one of two similar replicates are displayed. Results show that p-Syk is reduced by BCR KO in all lines.

(B) In two of the GCB-DLBCL lines shown in (A), cells with fusion of cpVenus (cpV) to the 5' end of SYK were created by KI, then sorted by flow cytometry to purity for further culture. These cells then underwent targeting of cpV, for the purpose of creating SYK-KO cells, and the resulting mixed culture of unmodified (cpV-positive) and SYK-KO (cpV-negative) cells was assessed by flow cytometry, after fixation and permeabilization, for cpV expression, total SYK content and p-Syk as in (A). Results show that the reduction in p-Syk staining caused by SYK KO is roughly the same as is caused by BCR KO, shown in (A).

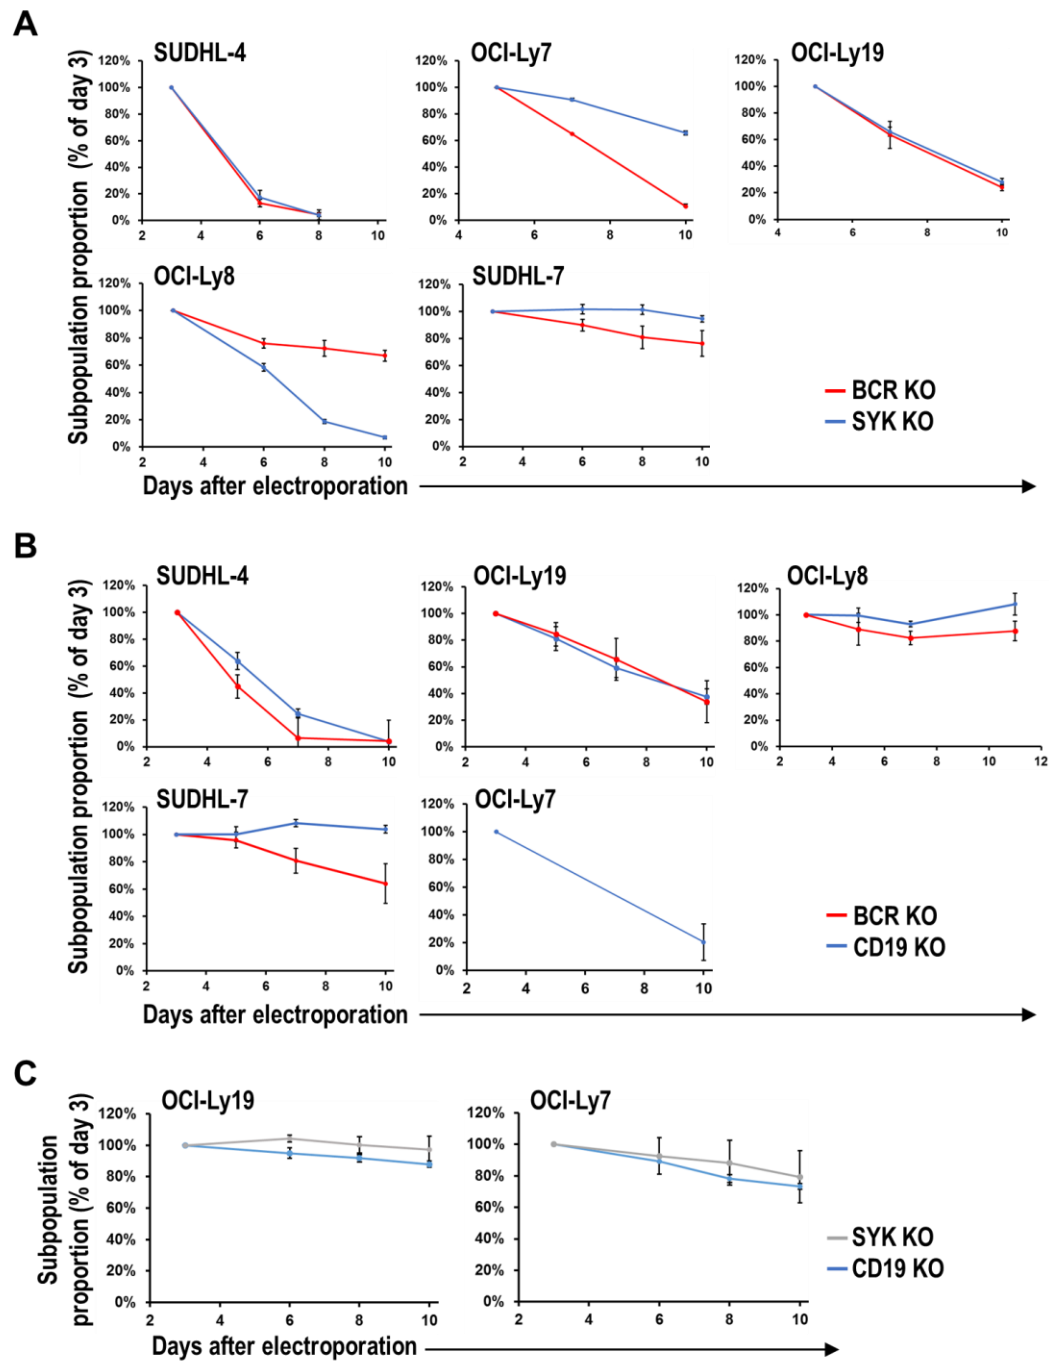

**Figure S12. SYK and CD19 KO replicate growth-retarding effect of BCR KO in GCB-DLBCL lines**

(A) Flow cytometry-determined proportions over time of cells with KO of SYK or BCR (by targeting IgH), normalized to their initial values 3 days post-electroporation. Cells with SYK KO were determined by staining after fixation and permeabilization. Mean  $\pm$  s.d. from 3 biological replicates, each with a different gRNA, is displayed.

(B) Flow cytometry-determined proportions over time of cells with KO of CD19 or BCR (by targeting IgH), normalized to their initial values 3 days post-electroporation. Decrease in proportion of CD19-KO cells in the OCI-Ly7 cell line is similar to the effect of BCR KO in previous experiments (decrease to 10-20% on day 10 post-electroporation). Mean  $\pm$  s.d. from 3 biological replicates (each with a different gRNA) is displayed.

(C) Flow cytometry-determined proportions over time of cells with KO of SYK or CD19, in 2 GCB-DLBCL lines which previously underwent sequential PTEN KO/GFP KI and BCR KO and were sorted to purity each time. Proportions are normalized to their initial values 3 days post-electroporation. Mean  $\pm$  s.d. from 3 biological replicates (each with a different gRNA) is displayed.

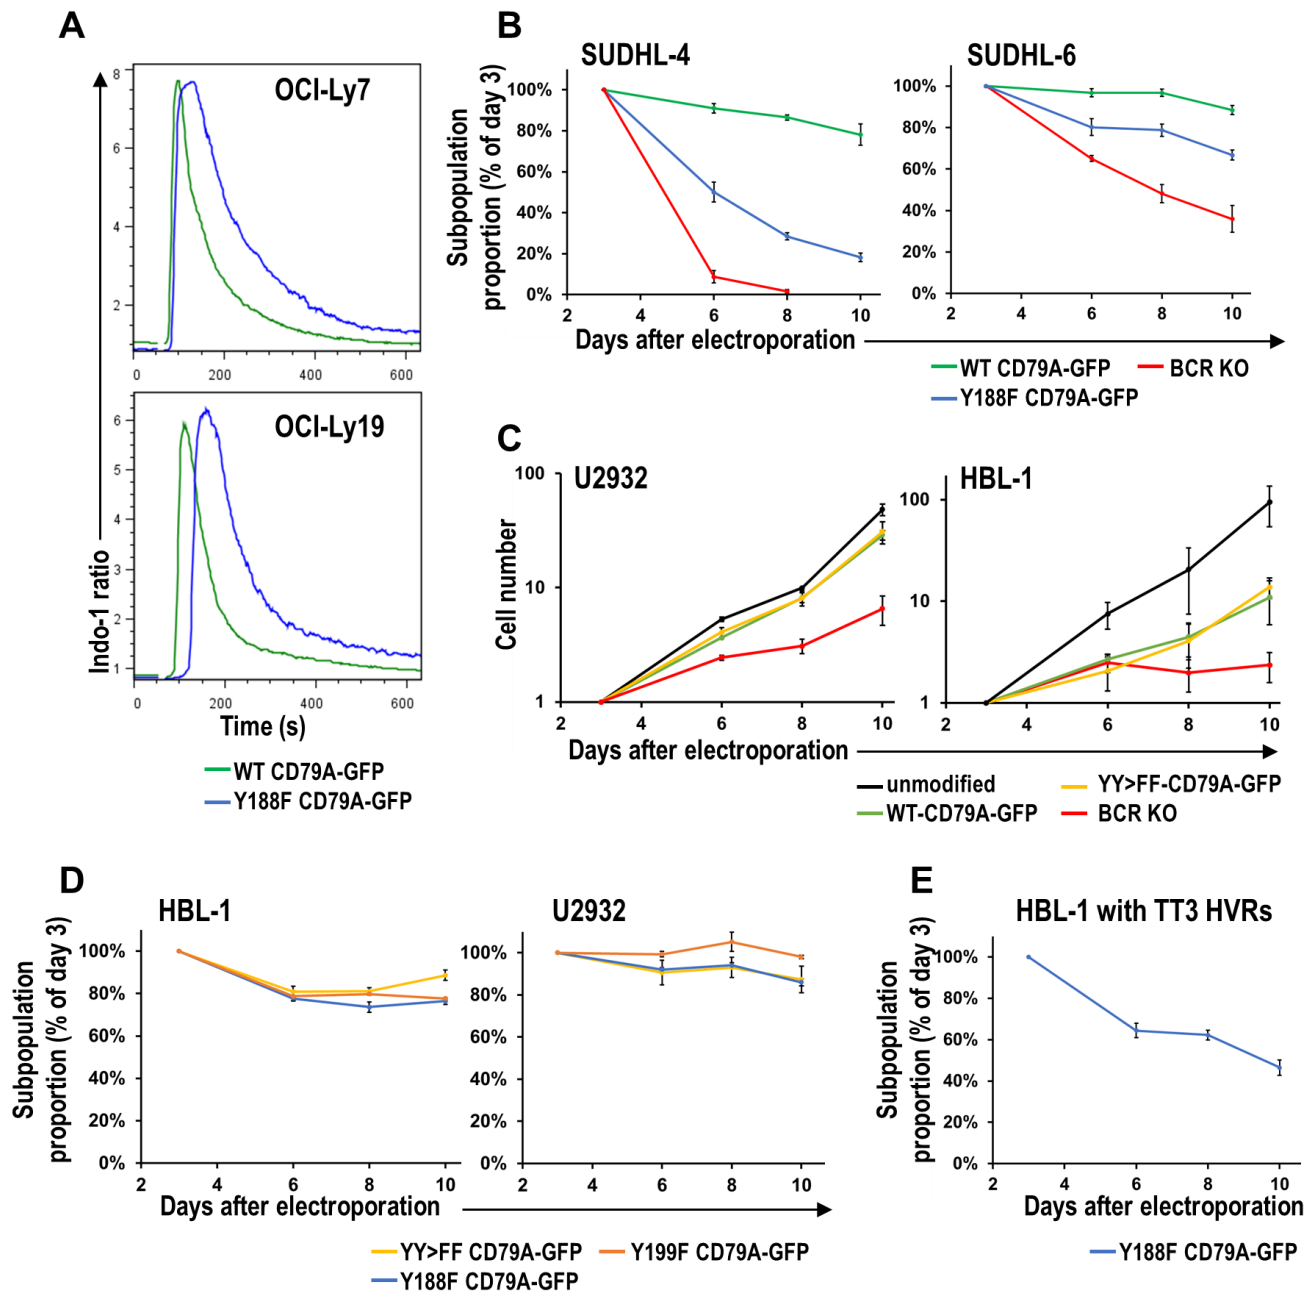

**Figure S13. Effect of CD79A ITAM tyrosine mutations on DLBCL lines**

(A) Calcium flux in response to BCR crosslinking with anti-IgM in CD79A-GFP knock-in cells is slightly prolonged by Y188F mutation in OCI-Ly7 and OCI-Ly19 GCB-DLBCL lines.

(B) Proportions of SUDHL-4 and SUDHL-6 cells modified by BCR KO or CD79A-GFP KI, relative to unmodified cells in the same cultures, at time points after electroporation. The results show a marked growth-inhibitory effect of the Y188F CD79A mutation. Relative decline with WT CD79A-GFP is attributed to subnormal BCR levels (which are the same as with Y188F CD79A-GFP; data not shown) in these highly BCR-dependent lines. Mean  $\pm$  s.d. from 3 biological replicates is displayed.

(C) Absolute growth curves for U2932 and HBL-1 ABC-DLBCL lines after BCR KO or CD79A-GFP knock-in (WT or ITAM YY>FF). In both lines, there is essentially no difference in growth between the two types of CD79A-GFP KI cells. Mean  $\pm$  s.d. from 3 biological replicates is displayed.

(D) Proportions of HBL-1 and U2932 cells modified by mutant CD79A-GFP KI, relative to unmodified cells in the same culture, and further normalized to the relative proportion of WT CD79A-GFP KI cells in a parallel culture. There is no significant effect of any mutation to Tyr residues in the CD79A ITAM. Mean  $\pm$  s.d. from 3 biological replicates is displayed.



(E) HBL-1 cells, previously modified by KI of an HVR (TT3) specific for tetanus toxoid, were further modified by KI of CD79A-GFP. Shown is the proportion of Y188F mutant cells, relative to unmodified cells in the same culture, and further normalized to the relative proportion of WT CD79A-GFP KI cells in a parallel culture. Mean  $\pm$  s.d. from 3 biological replicates is displayed.

A

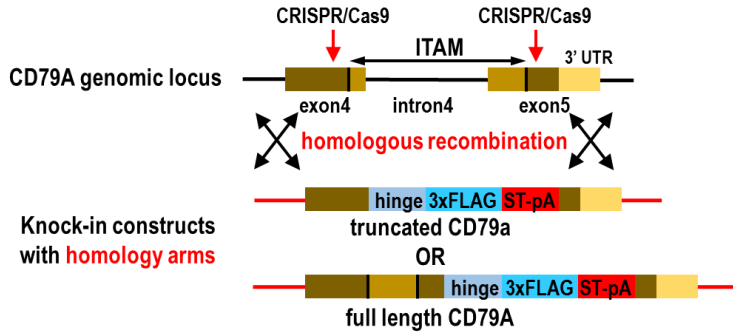

B

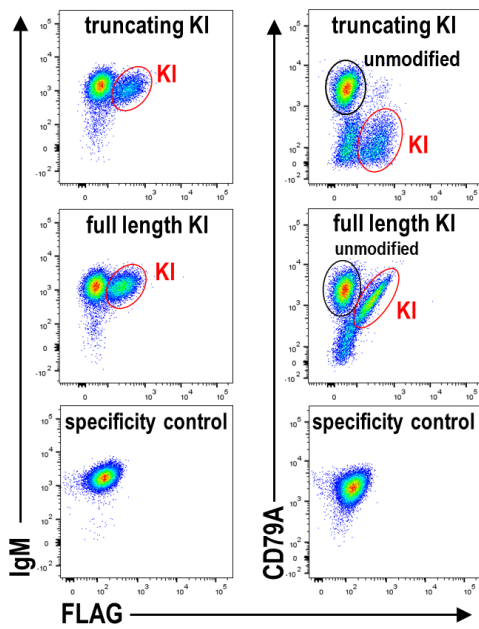

C

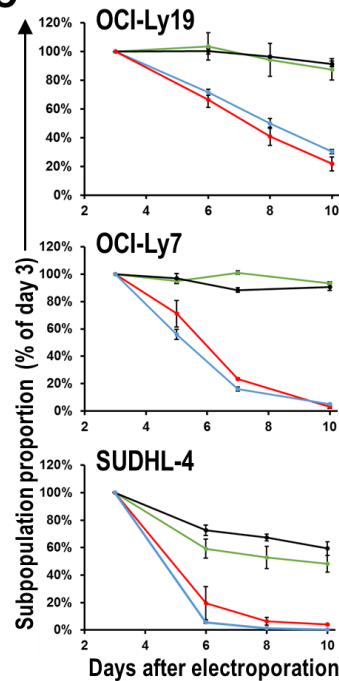

D

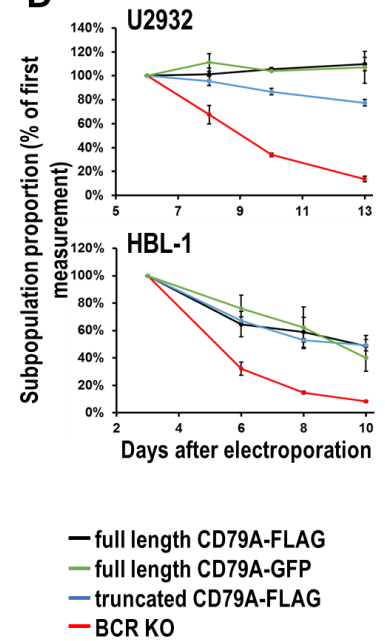

**Figure S14. Effect of CD79A truncation on growth of DLBCL lines**

(A) Schematic of knock-in approach to fuse 3xFLAG to the 3' end of full-length or truncated CD79A.

(B) BCR surface levels vs. intracellular staining for FLAG or CD79A (using an antibody recognizing the cytoplasmic terminal portion of CD79A) of OCI-Ly7 cells 5 days post-electroporation to KI CD79A-FLAG constructs. Absence of CD79A staining in FLAG-positive cells confirms truncation. No FLAG-positive cells were detected when non-specific gRNA was used in combination with the full length CD79A-FLAG KI construct (bottom panels).

(C) Flow cytometry-determined proportions over time of cells with KI of full-length or truncating CD79A-FLAG constructs or BCR KO (by targeting IgH), normalized to their initial values 3 days post-electroporation in 3 GCB-DLBCL cell lines, showing similar growth-retarding effects of CD79A truncation and BCR KO. Mean  $\pm$  s.d. from 3 biological replicates is displayed.

(D) Similar graphs as C for 2 ABC-DLBCL lines, showing no effect of CD79A truncation as compared to full length CD79A KI. Mean  $\pm$  s.d. from 3 biological replicates is displayed.

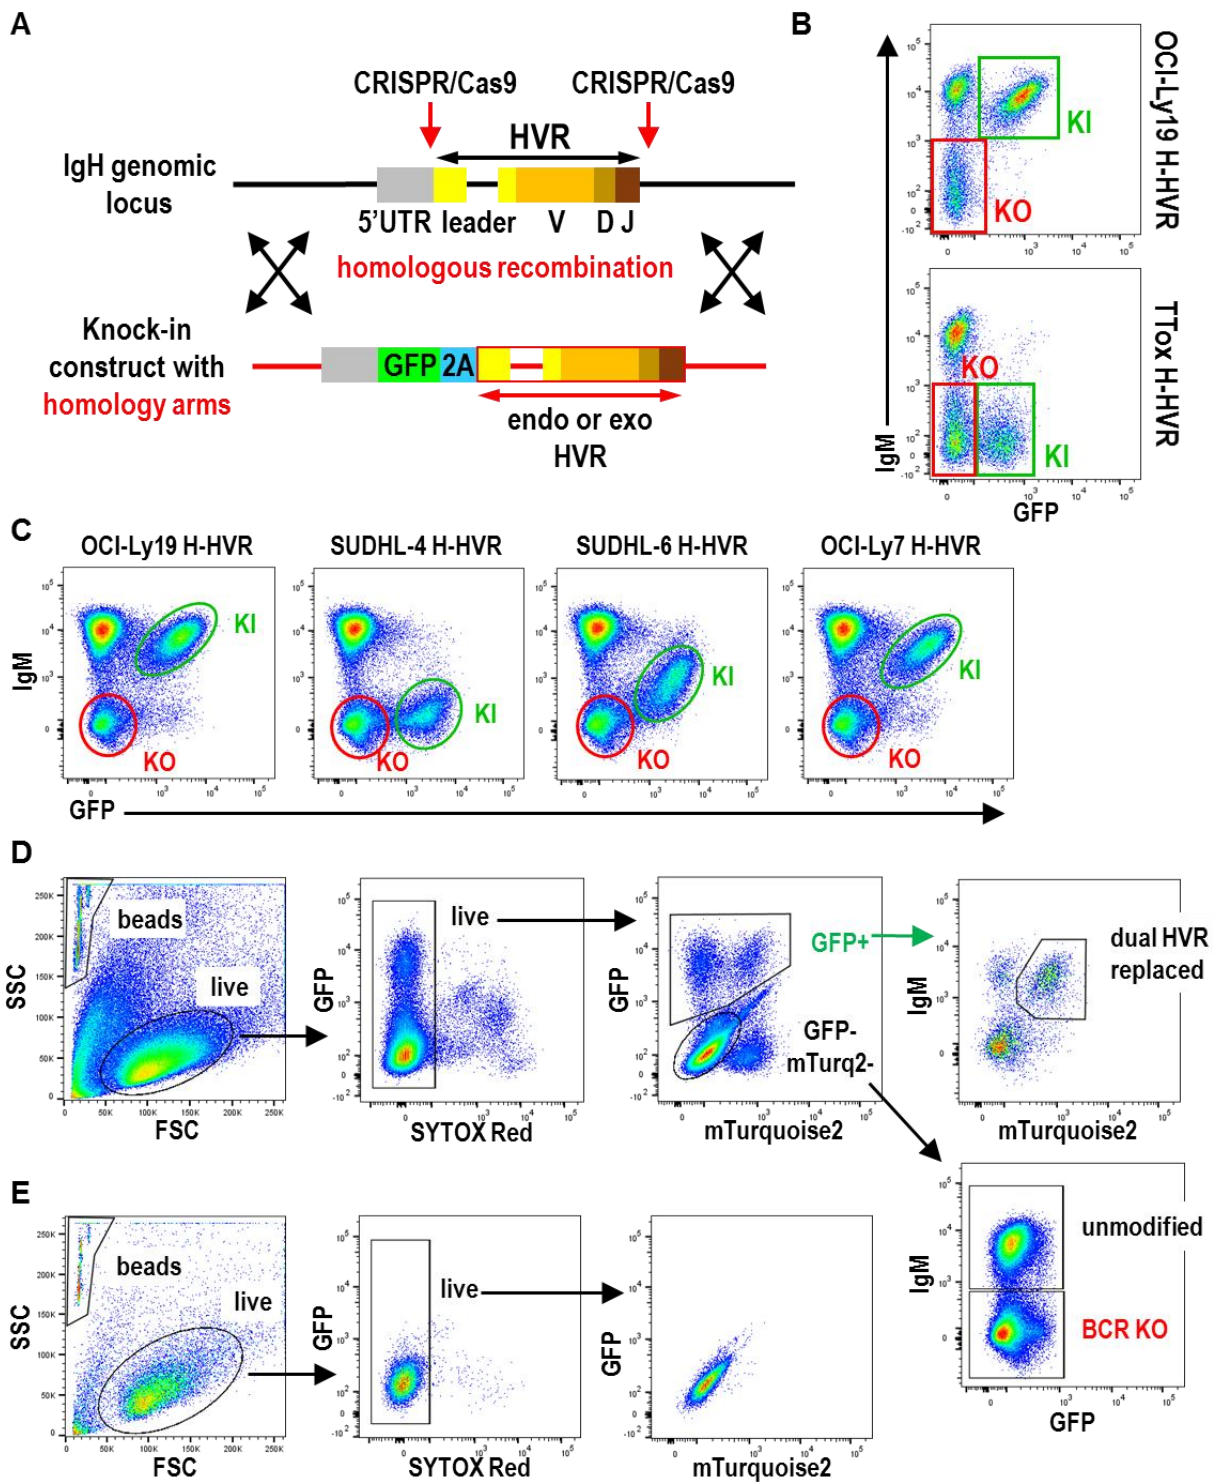

**Figure S15. Design, gating strategy, and compatibility of HVR replacement**

(A) Schematic for replacement of IgH HVR (H-HVR). GFP cDNA, knocked in at the start of IgH translation, is followed in frame by a 2A peptide sequence, which creates a break during translation. The post-break translated polypeptide resembles a normal IgH chain; beginning with an IgH leader sequence (signal peptide, spanning an intron) followed by an HVR, either endogenous (endo; i.e., the H-HVR of the cell line being targeted) or exogenous (exo, from another B cell), and is inserted into the plasma membrane and incorporated into a BCR complex, depending on compatibility with the IgL chain. The design for replacement of the IgL HVR is similar, but a CFP variant (mTurquoise2) is used rather than GFP, and there is no D segment.

(B) Levels of surface BCR and GFP (the marker of H-HVR replacement) of OCI-Ly19 cells 5 days post-electroporation. Knock-in of endogenous H-HVR (top) produces normal surface BCR levels in GFP-expressing cells, but exogenous TTox-reactive H-

HVR (bottom) produces low BCR levels in GFP-expressing cells. At lower left of both panels are cells that underwent simple BCR KO.

(C) Surface BCR and GFP levels of OCI-Ly19 cells 6 days post-electroporation with H-HVRs from other GCB-DLBCL lines. Endogenous H-HVR (left panel) again yields normal surface BCR levels in GFP-expressing cells. Exogenous H-HVR sequences (remaining panels) yield variably-subnormal surface BCR levels in GFP-expressing cells.

(D) Gating strategy to distinguish dual HVR-replaced, BCR-KO, and unmodified cells. Levels of GFP (marker for IgH HVR replacement), mTurquoise2 (marker for IgL HVR replacement), BCR (stained for IgM), and SYTOX Red (dead cell dye) are shown for SUDHL-6 cells 5 days post-electroporation.

(E) As a specificity control, SUDHL-6 cells were electroporated with the same IgH and IgL HVR replacement constructs as in (D), along with four Cas9/gRNA plasmids designed to target the IgH and IgL HVR regions of another cell line (SUDHL-4).

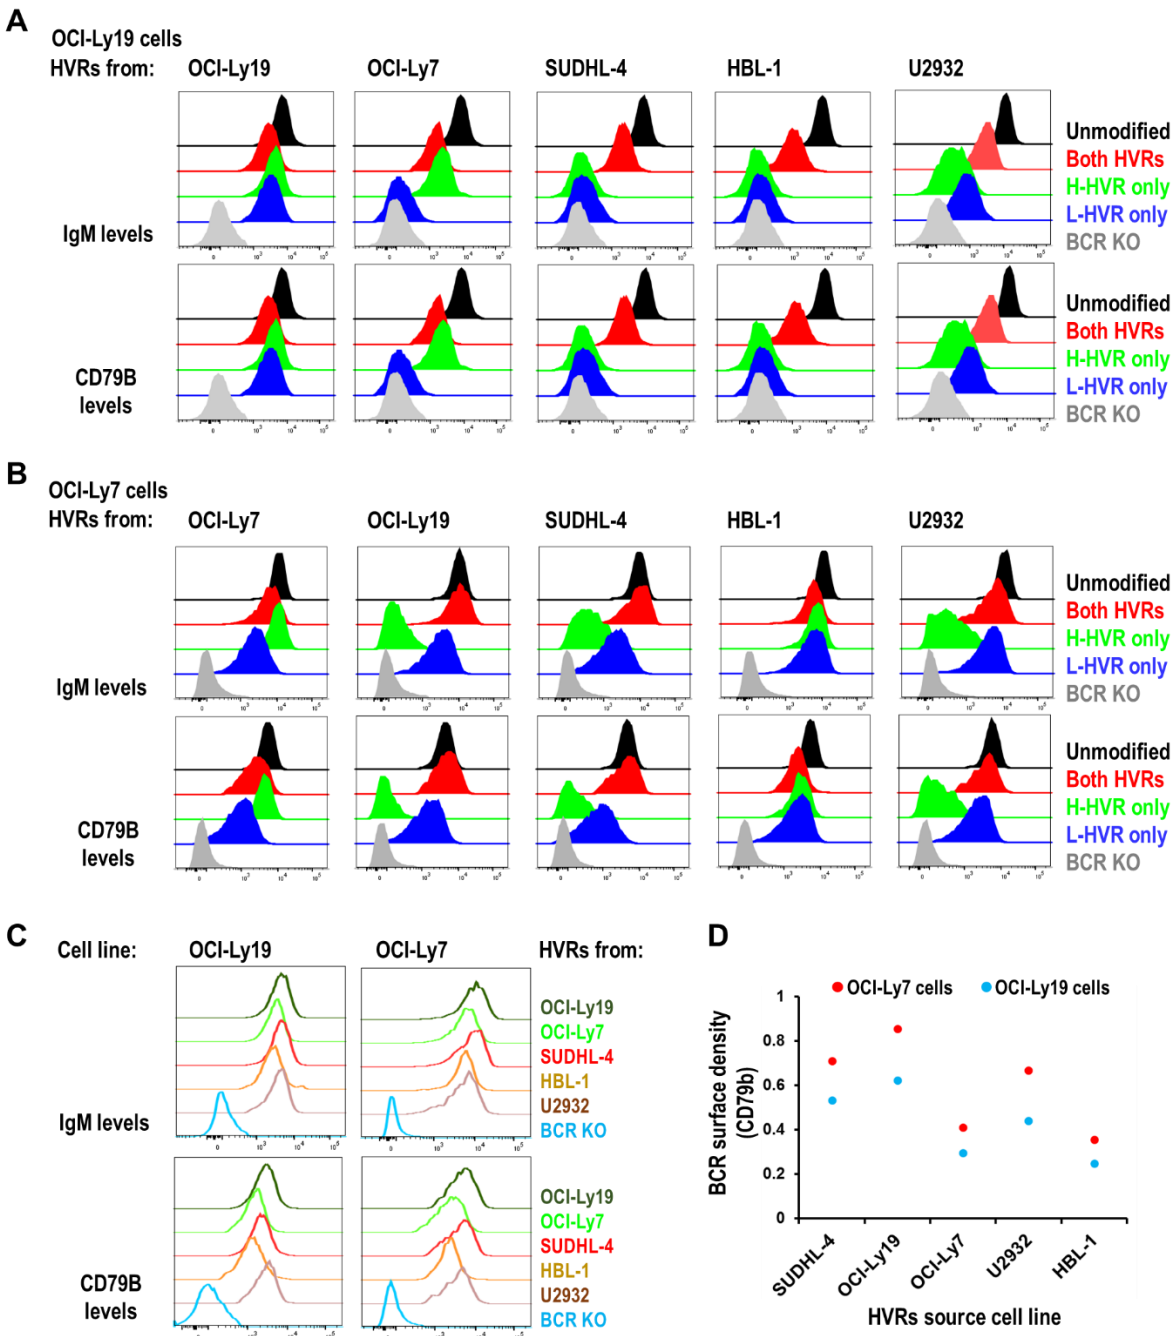

**Figure S16. Surface BCR levels after single and dual HVR replacements in 2 GCB-DLBCL lines with HVR sequences from other DLBCL lines**

(A) Histograms of surface IgM (top panels) and CD79B (bottom panels) levels in OCI-Ly19 cells 6 days after knock-in of HVR sequences (IgH, IgL, or both) or BCR KO (by targeting IgH). In each set of histograms, all donor HVR sequences come from the DLBCL line indicated, of GCB-DLBCL (OCI-Ly7, OCI-Ly19, and SUDHL-4) or ABC-DLBCL type (U2932 and HBL-1). Cells generating each histogram were identified as viable (by scatter properties and a dead-cell dye) and expressing the marker protein(s) specific for IgH (GFP) and/or IgL (mTurquoise2). Donor HVR sequences from OCI-Ly19 are free from incompatibility issues, as expected; the slightly lower BCR levels (as compared to unmodified OCI-Ly19 cells) are attributed to adding a marker protein and 2A peptide sequence to the Ig transcripts.

(B) Similar to (A), but with OCI-Ly7 as the recipient line and analysis 4 days after knock-in of HVR sequences.

(C) Histograms of surface BCR levels (by anti IgM and CD79B) in OCI-Ly19 and OCI-Ly7 cells after knock-in of dual HVR sequences (IgH and IgL) from the DLBCL lines indicated; these data are a subset of data shown in (A) and (B).

(D) From the experimental data in c, average BCR surface density was calculated for each recipient GCB-DLBCL line (OCI-Ly7 or OCI-Ly19) modified by dual replacement with paired HVRs from a DLBCL cell line.

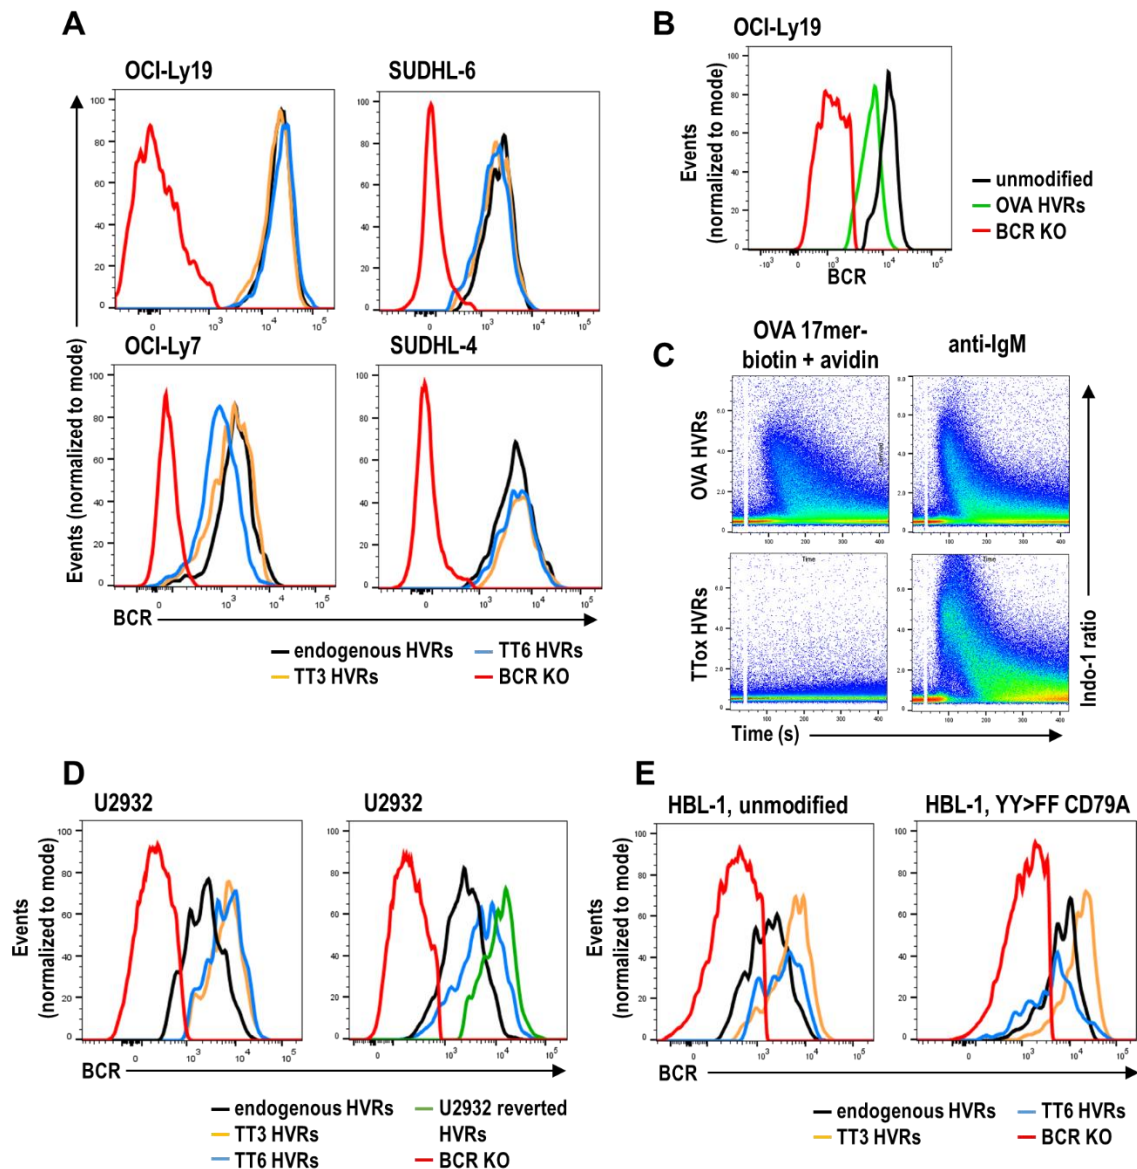

**Figure S17. Surface BCR levels and functional response after dual HVR replacements in DLBCL lines**

(A) Dual replacement with TTox-reactive HVRs in 4 GCB-DLBCL lines, whose effect on absolute growth curves are shown in Figure 6B. BCRs were expressed at levels similar to those of endogenous HVRs. Results were obtained post-electroporation for OCI-Ly19 (day 7), SUDHL-6 (day 5), OCI-Ly7 (day 6), and SUDHL-4 (day 6).

(B) BCR levels of OCI-Ly19 cells 3 days post-electroporation for dual HVR replacement with OVA-specific HVRs, in comparison to unmodified and BCR-KO cells from the same experiment.

(C) Calcium flux in response to BCR stimulation in OCI-Ly19 cells with OVA- or TTox-reactive HVRs. BCR crosslinking with anti-IgM triggers calcium flux for both HVR types, but only cells with OVA-specific HVRs respond to OVA-17mer-biotin complexed with avidin.

(D) Dual replacement with TTox-reactive HVRs and reverted endogenous U2932 HVRs in the U2932 cell line produced BCRs that were expressed at higher levels than endogenous HVRs. Effects of these HVRs on absolute growth are shown in Figure 6C. Results shown are from 5 days post-electroporation.

(E) Similar to (D), but with unmodified and YY>FF CD79A-GFP HBL-1 cells analyzed 3 days post-electroporation for dual HVR replacement. For the YY>FF CD79A-GFP HBL-1 cells, RFP was used as the marker for H-HVR replacement. The effects of these HVRs on absolute growth curves are shown in Figure 6D.



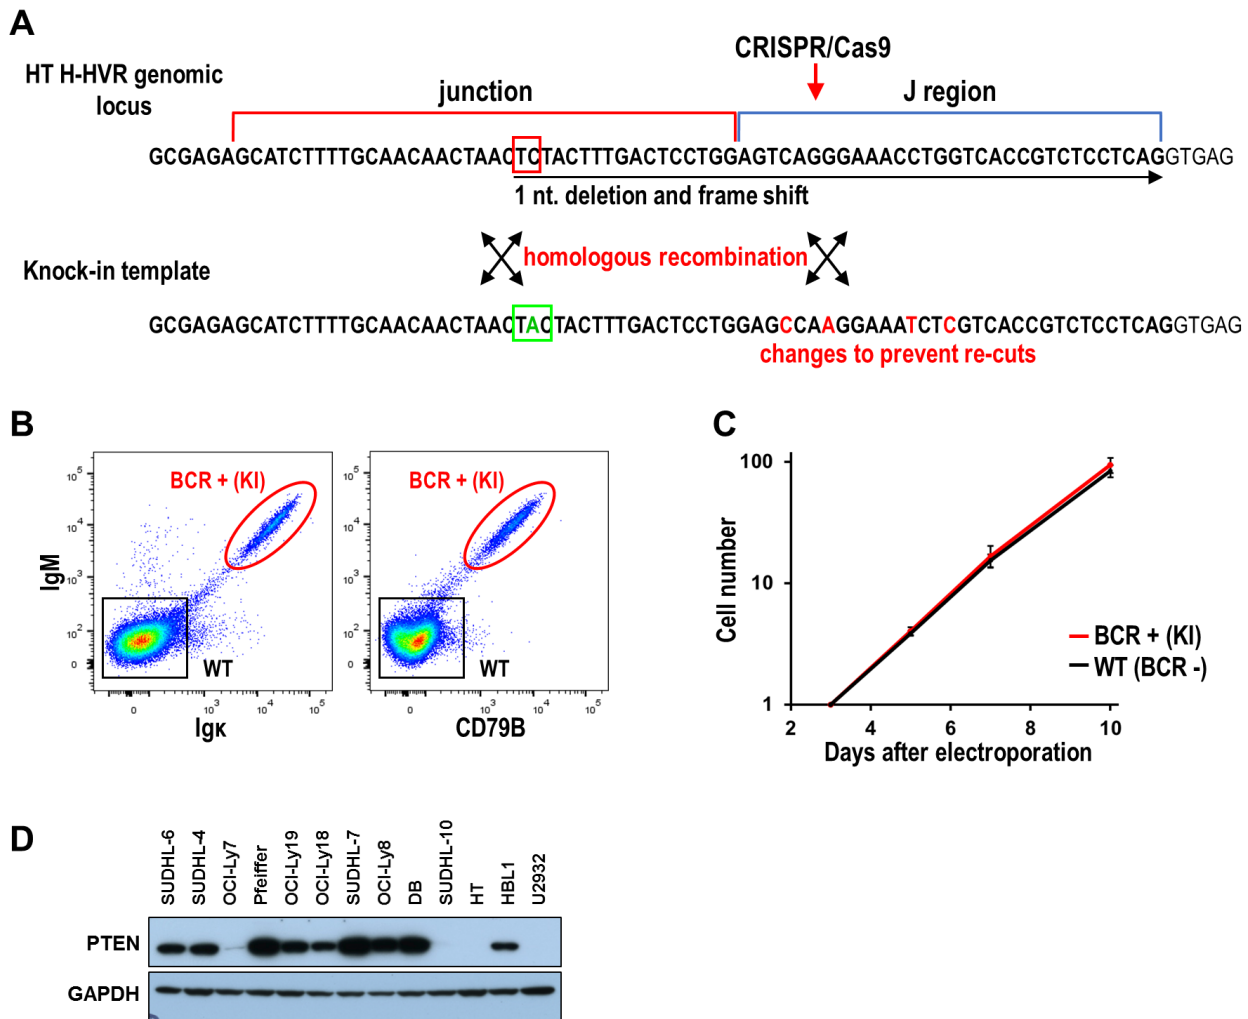

**Figure S18. BCR re-expression in cell line HT, one of two naturally PTEN-deficient GCB-DLBCL lines studied**

(A) Schematic of knock-in approach to repair the single nucleotide deletion in the HT H-HVR sequence. The presumed deficient codon in the genomic sequence is indicated by a red box, and the donor repair codon by a green box.

(B) Levels of IgM, Igk, and CD79B in HT cells 7 days post-electroporation to knock in the missing nucleotide; a population of cells has re-expressed BCR components on their cell surface.

(C) Similar rates of absolute growth curves for WT (BCR-negative) and re-expressed BCR-positive (KI) HT cells. Mean  $\pm$  s.d. from 3 biological replicates is displayed.

(D) Western blot for PTEN protein expression by DLBCL used in this study, showing loss in SUDHL-10, HT, and U2932.

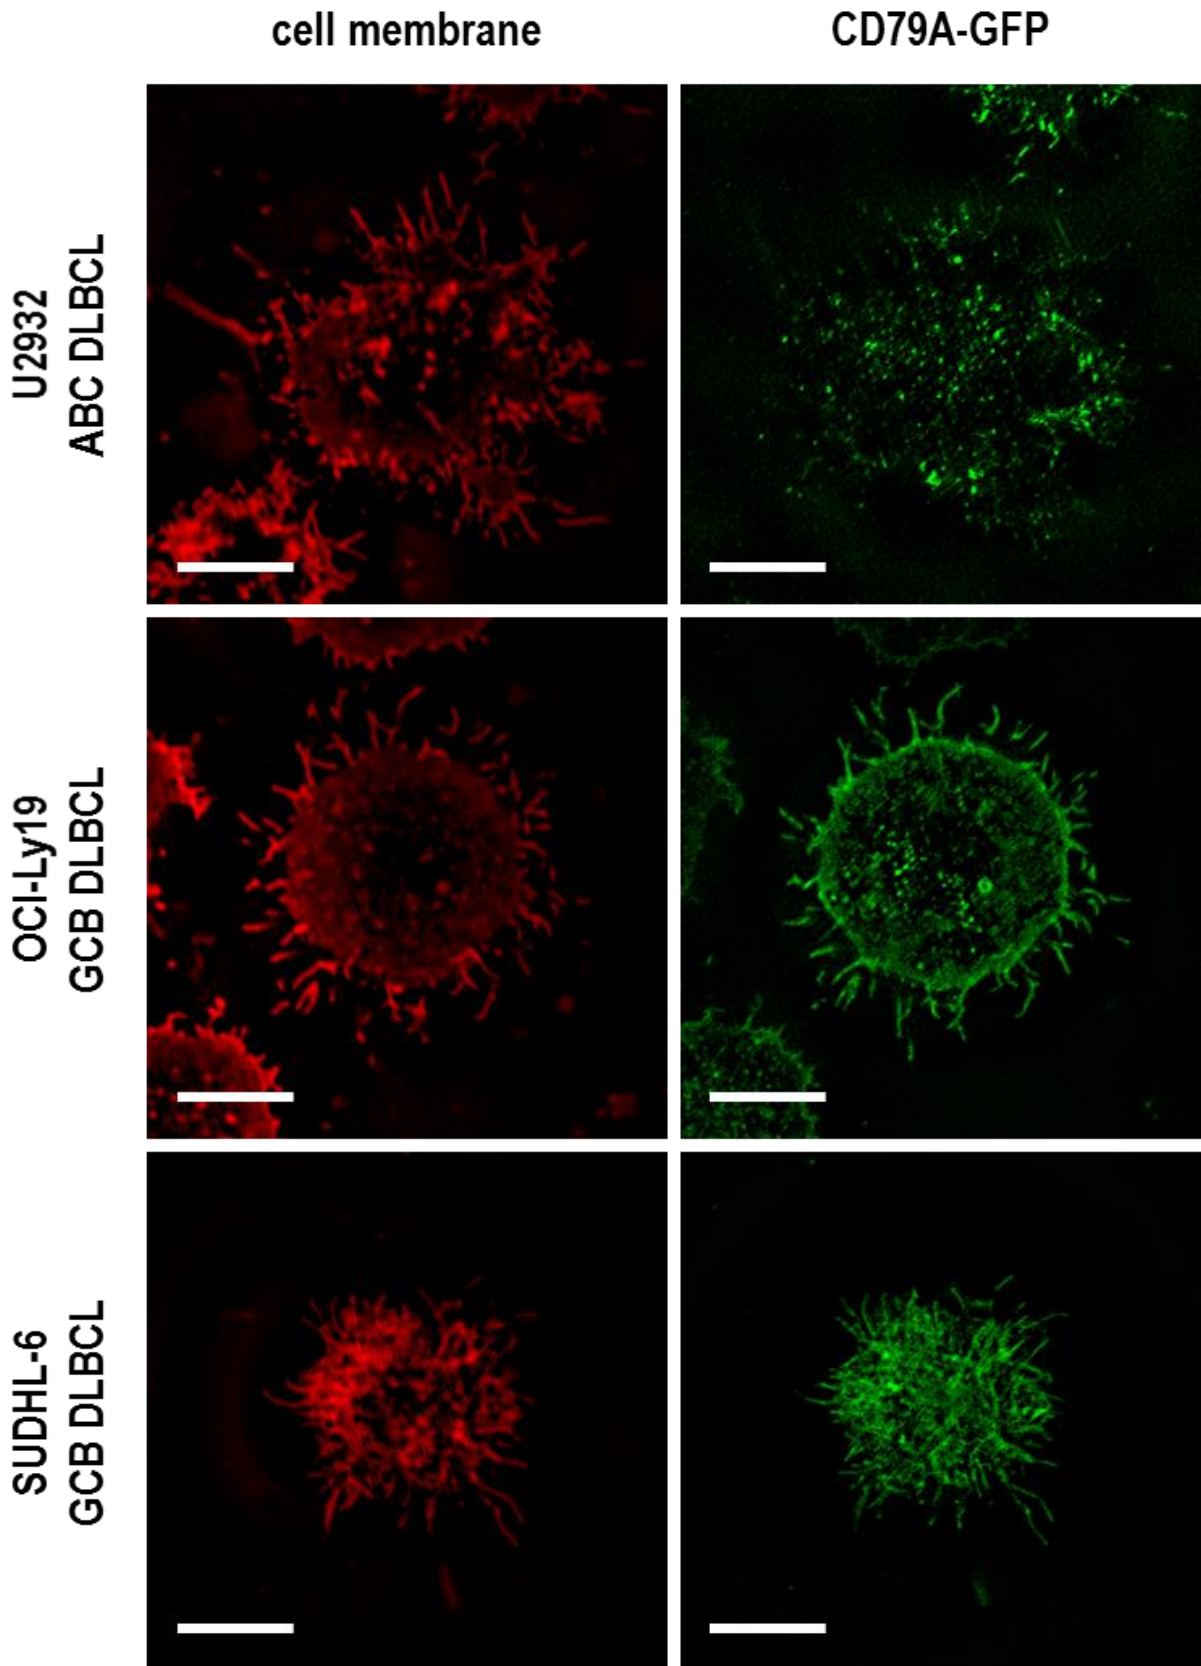

**Figure S19. BCR surface distribution in DLBCL cell lines differs according to subtype**

Super-resolution microscopy shows clustering of BCR units in the ABC-DLBCL line U2932, but diffuse distribution in the GCB-DLBCL lines OCI-Ly19 and SUDHL-6. BCR units were labeled by knock-in fusion of GFP to CD79A. Red CellMask dye marks the surface membrane. Live cells were imaged at the point of contact with glass coverslip chamber slides (bars = 5  $\mu$ m).



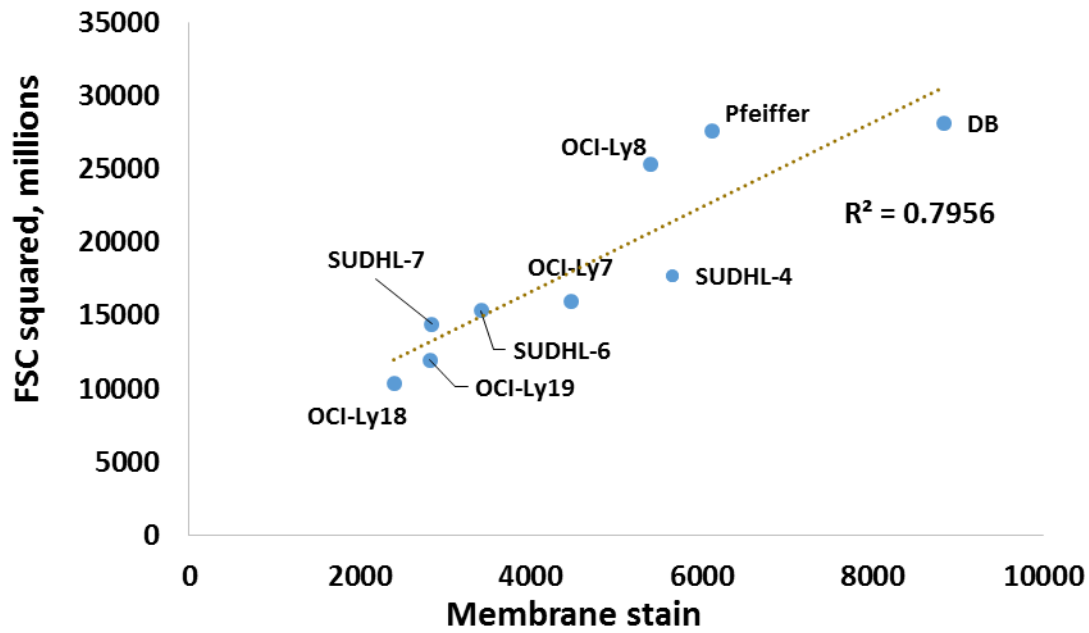

**Figure S20. Correlation between squared FSC value and cell membrane content**

Squared FSC value and cell membrane content (determined by fluorescence after staining with CellMask™ Deep Red plasma membrane stain) of unmodified GCB-DLBCL lines. The correlation supports the use of the squared FSC value as a measure of cell surface area.

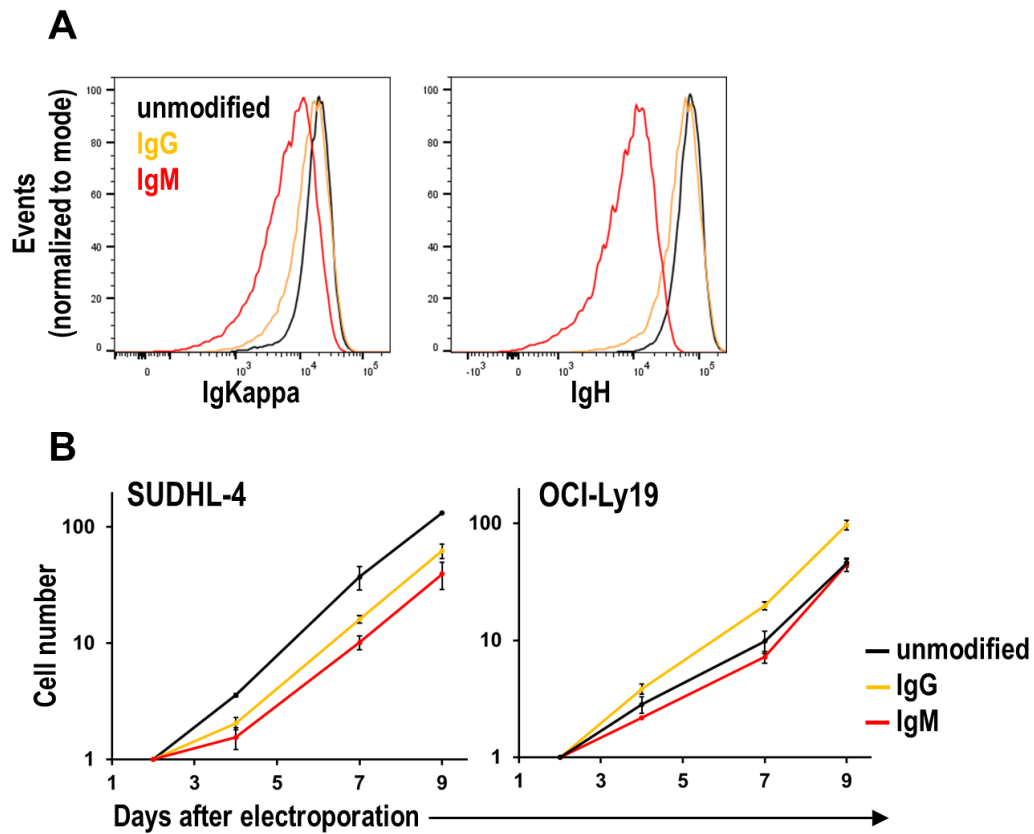

**Figure S21. Effect of IgH isotype on surface BCR level and growth rates of GCB-DLBCL lines**

(A) Surface BCR levels of SUDHL-4 cells, stained for either IgL kappa or the expressed IgH isotype: unmodified (WT, naturally IgG4), or with maximal expression of inducible IgG4 or IgM at a high concentration of doxycycline (200 ng/mL). IgL kappa staining between the two isotypes is more similar than results obtained with different IgH isotype-specific antibodies.

(B) Absolute growth rates of SUDHL-4 and OCI-Ly19 cells: unmodified (WT), or with maximal expression of inducible IgG4 or IgM. Cell number is normalized to its value 2 days after induction. Mean  $\pm$  s.d. from 3 biological replicates is displayed.

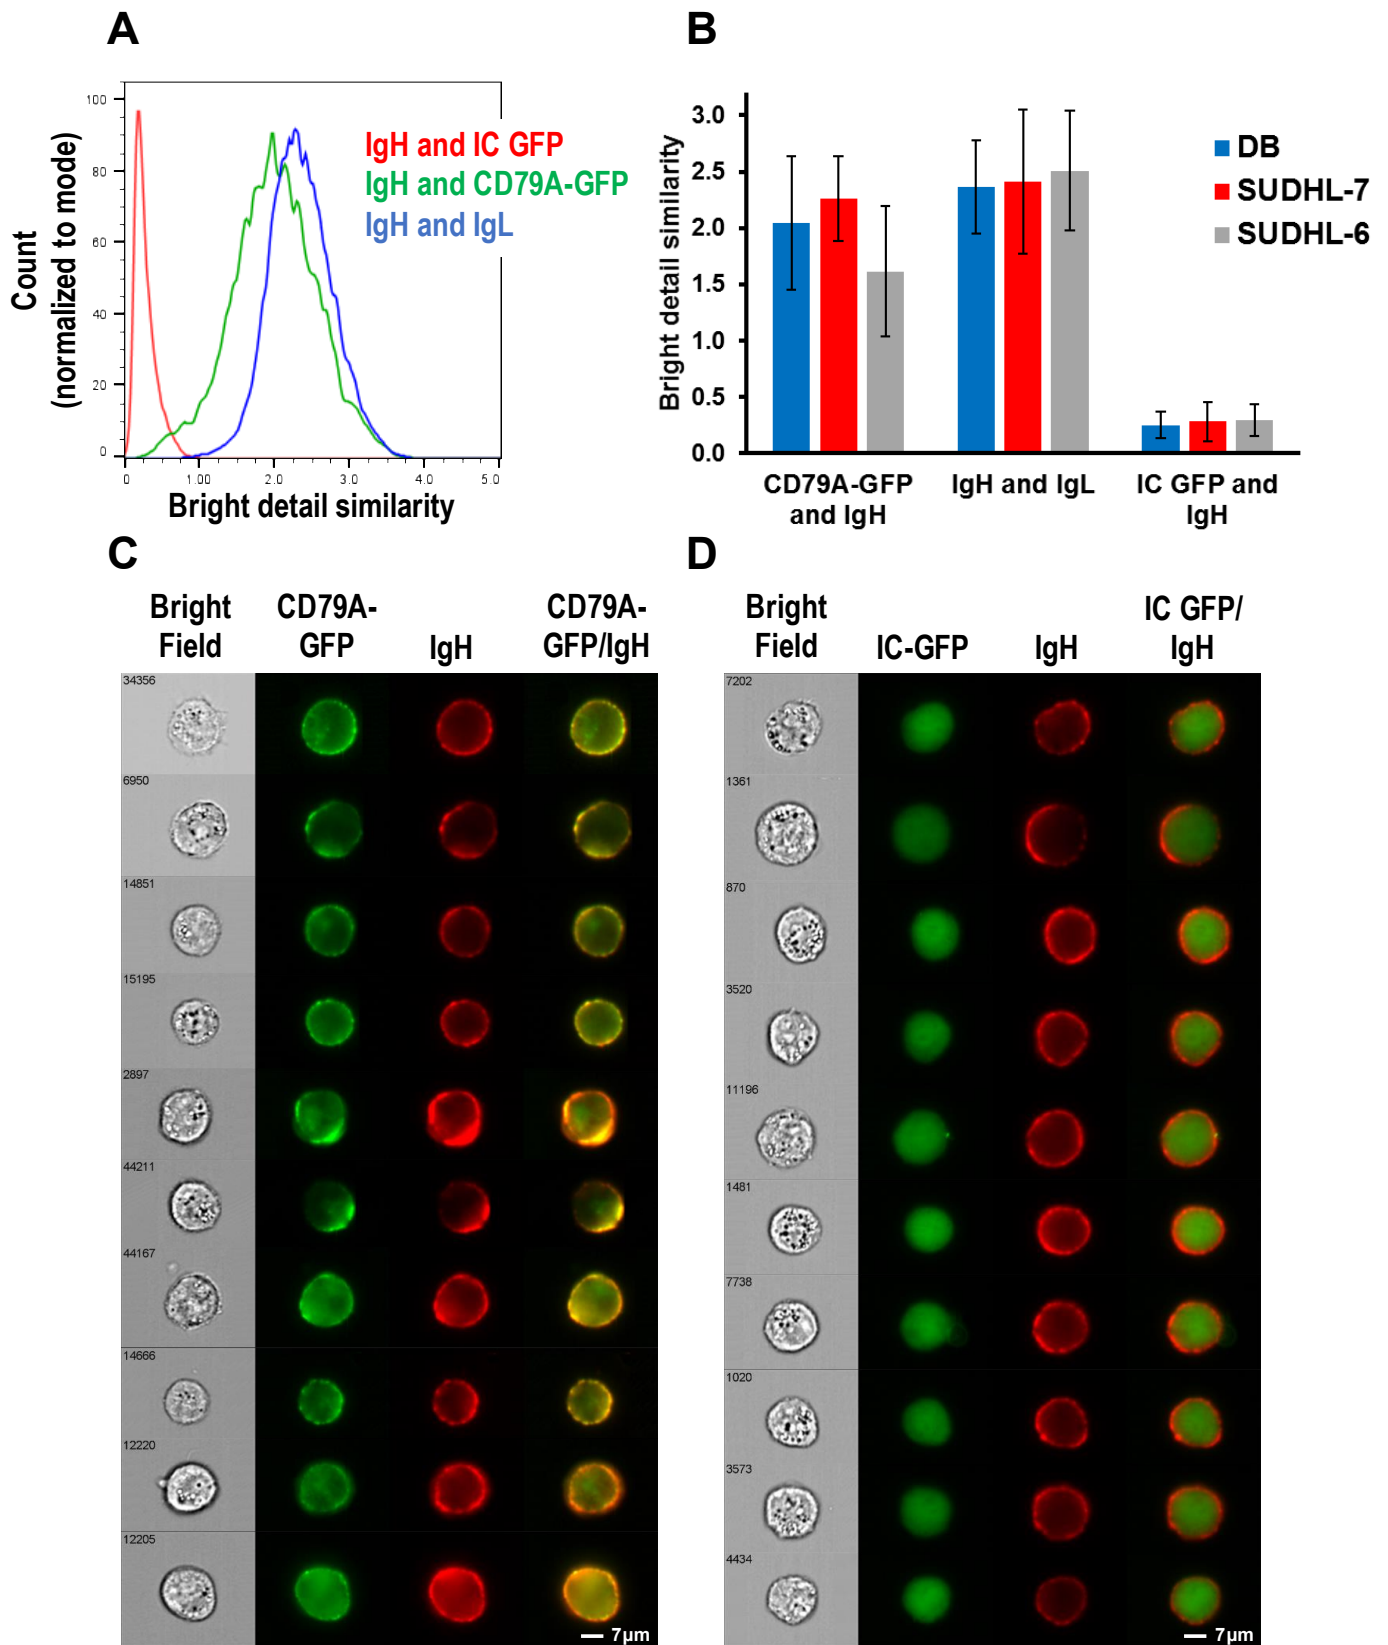

**Figure S22. Image cytometry shows predominant colocalization of CD79A-GFP with surface IgH**

(A) The similarity bright detail score (SBDS)<sup>15</sup> was determined with the ImageStream imaging flow cytometer. Histograms of the SBDS for 3 types of cells of the GCB-DLBCL line are shown overlaid: cells modified (only) by CD79A-GFP knock-in and stained with APC-labeled anti-IgH (green line); unmodified cells stained with FITC-labeled anti-IgH and APC-labeled anti-IgL, as an SBDS-high control (blue line); and cells expressing unfused (cytoplasmic) GFP and stained with APC-labeled anti-IgH, as

an SBDS-low control (red line). The histogram for CD79A-GFP cells is similar to the SBDS-high control histogram from IgH/IgL dual-stained cells, and very different from the SBDS-low control histogram from cells with cytoplasmic GFP, supporting predominant colocalization of CD79A-GFP with surface IgH.

(B) The median and MAD (median absolute deviation) were calculated from the SBDS histograms for 3 GCB-DLBCL lines, each analyzed by 3 types of cells as in A. Again, results support predominant colocalization of CD79A-GFP with surface IgH.

(C) Individual representative images of CD79A-GFP knock-in cells of the GCB-DLBCL line DB, stained with APC-labeled anti-IgH. The predominantly yellow color of the overlaid GFP and IgH images (rightmost column) supports colocalization of CD79A-GFP with surface IgH.

(D) Individual representative images of cells of the GCB-DLBCL line DB expressing unfused (cytoplasmic) GFP, stained with APC-labeled anti-IgH. The overlaid GFP and IgH images (rightmost column) show an absence of colocalization.

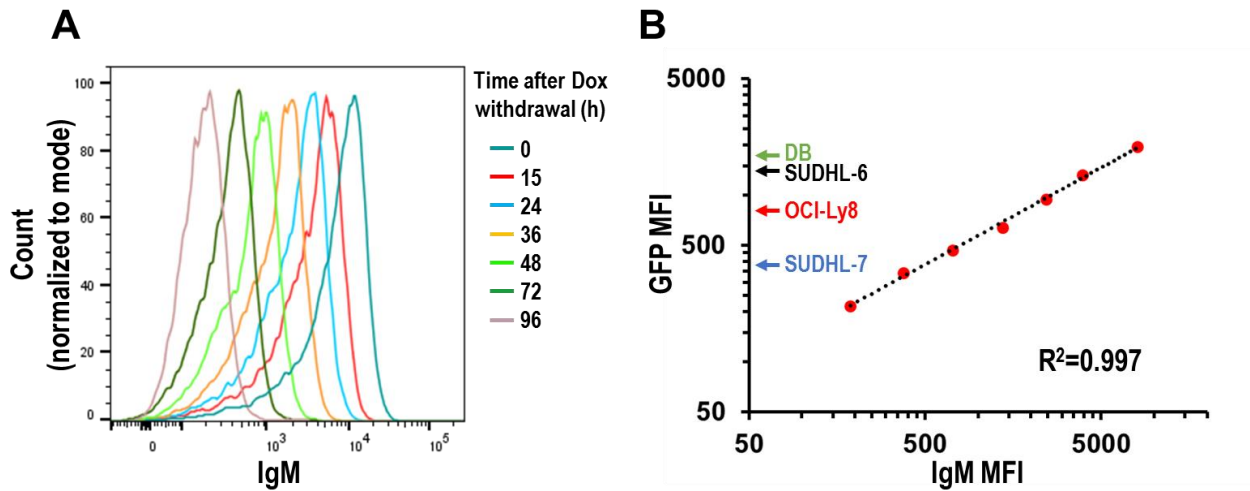

**Figure S23. Correlation of BCR surface level and CD79A-GFP fluorescence in cells with inducible IgH expression**

(A) Surface BCR level, detected by flow cytometry with anti-IgM, in OCI-Ly19 cells with inducible IgM expression (and stable KI of WT CD79A-GFP) at different time points after withdrawal of doxycycline.

(B) Correlation between BCR surface level and CD79A-GFP fluorescence after doxycycline withdrawal in OCI-Ly19 cells with inducible IgM and stable KI of WT CD79A-GFP. Arrows on the Y-axis indicate “natural” levels of GFP fluorescence in otherwise-unmodified CD79A-GFP versions of 4 GCB-DLBCL lines with intermediate to low levels of BCR surface density as measured by CD79A-GFP

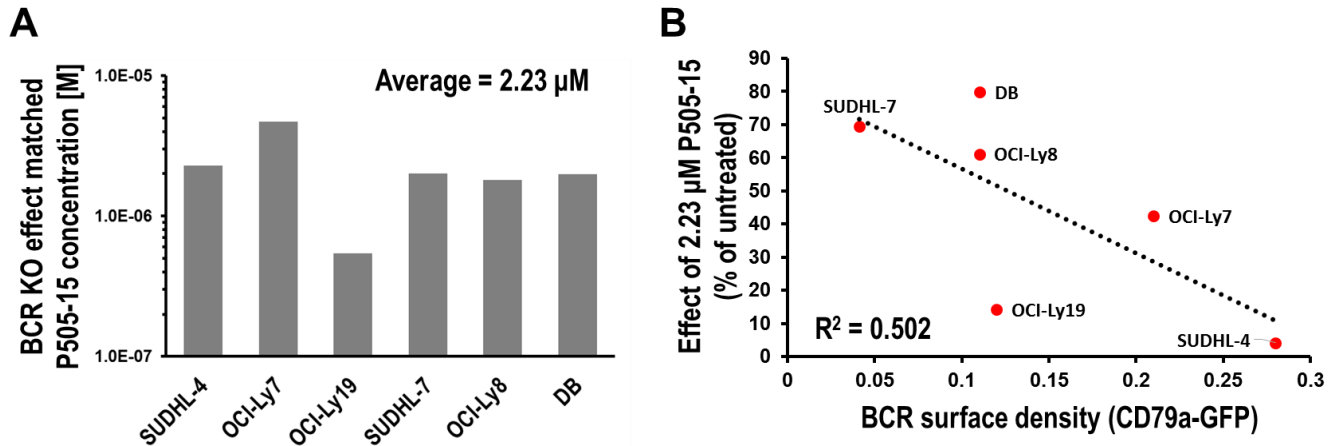

**Figure S24. Correlations of BCR surface density with sensitivity of GCB-DLBCL lines to BCR KO or SYK inhibitor P505-15**

(A) Comparison of the concentration of SYK inhibitor P505-15 in various GCB-DLBCL lines at which the relative reduction in the number of viable cells after 4 days' incubation is the same as the reduction produced by BCR KO. The latter was calculated from absolute growth curves of unmodified and BCR-KO cells, from which "relative proliferation" was also calculated; then, this value for %reduction value after 4 days of BCR KO was used to interpolate the P505-15 concentration from the dose-response curves of 4-day P505-15 treatment. The general similarity of this "BCR-inhibitory" concentration of P505-15 in different GCB-DLBCL lines is consistent with the effect of this SYK inhibitor at lower doses being specifically determined by its interruption of tonic BCR signaling and AKT activity.

(B) BCR surface density in GCB-DLBCL lines, based on CD79A-GFP fluorescence, correlated with calculated relative reduction in cell number after 4 days of treatment with the average BCR-inhibitory concentration of P505-15 (2.23  $\mu$ M), calculated from (A).

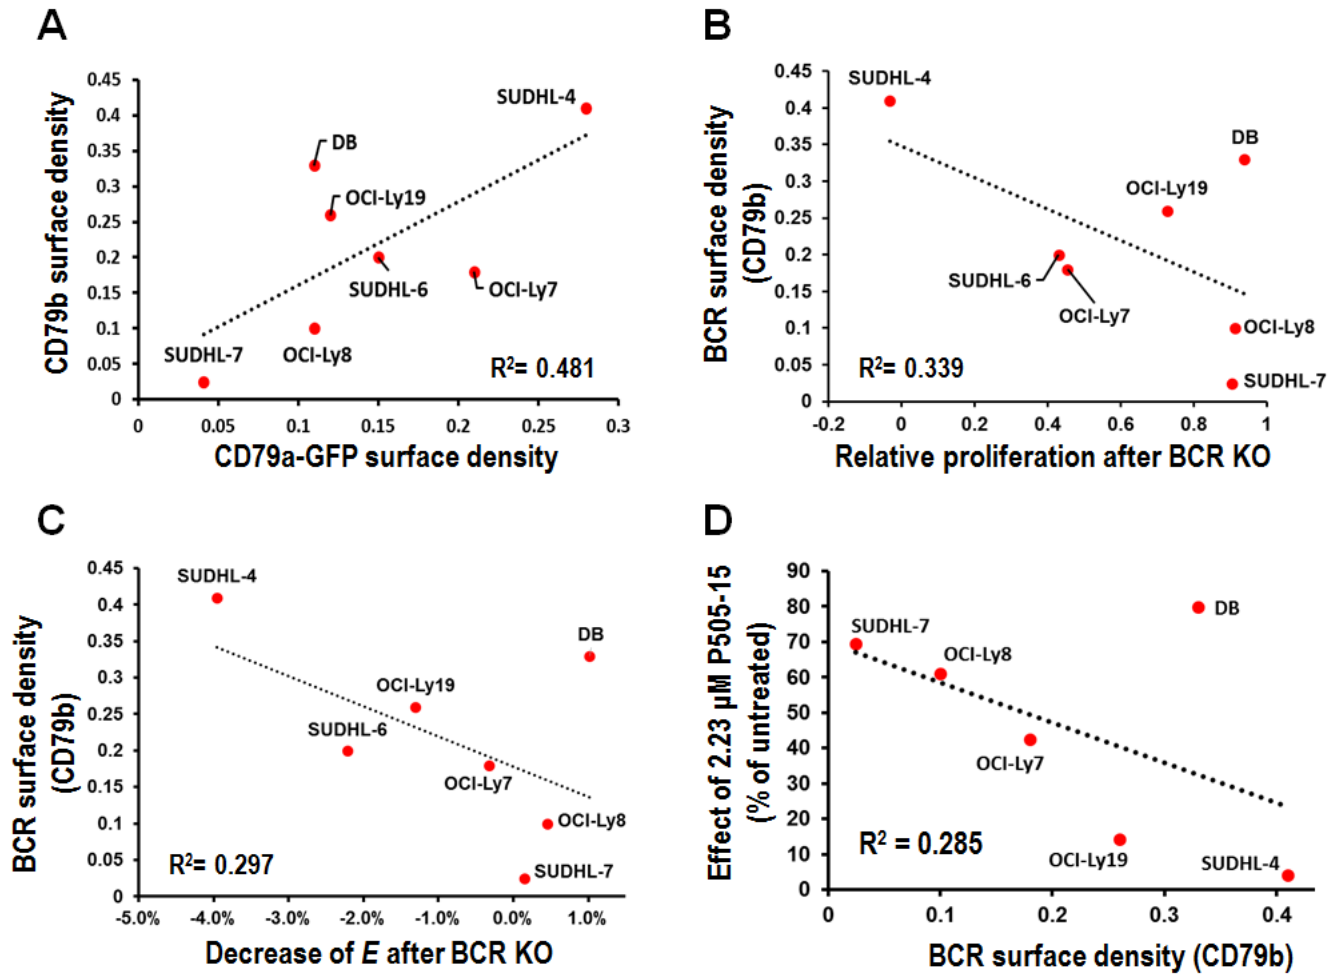

**Figure S25. BCR surface density based on surface CD79B staining shows non-uniform correlation with other measures**

(A) Correlation between BCR surface densities based on surface CD79B staining and CD79A-GFP fluorescence, across a spectrum of GCB-DLBCL lines. IgG-expressing line DB is an outlier.

(B) Correlation between surface CD79B-based BCR surface density and effect of BCR KO on proliferation in GCB-DLBCL lines.

(C) Correlation between BCR surface density based on CD79B staining and BCR KO-induced reduction in AKT activity, as measured by percentage decrease of E, FRET efficiency, determined by flow cytometry in 3 biological replicates (each with a different gRNA).

(D) Correlation between surface CD79B-based BCR surface density and sensitivity to a “BCR-inhibitory” concentration of P505-15 (see Figure S24).

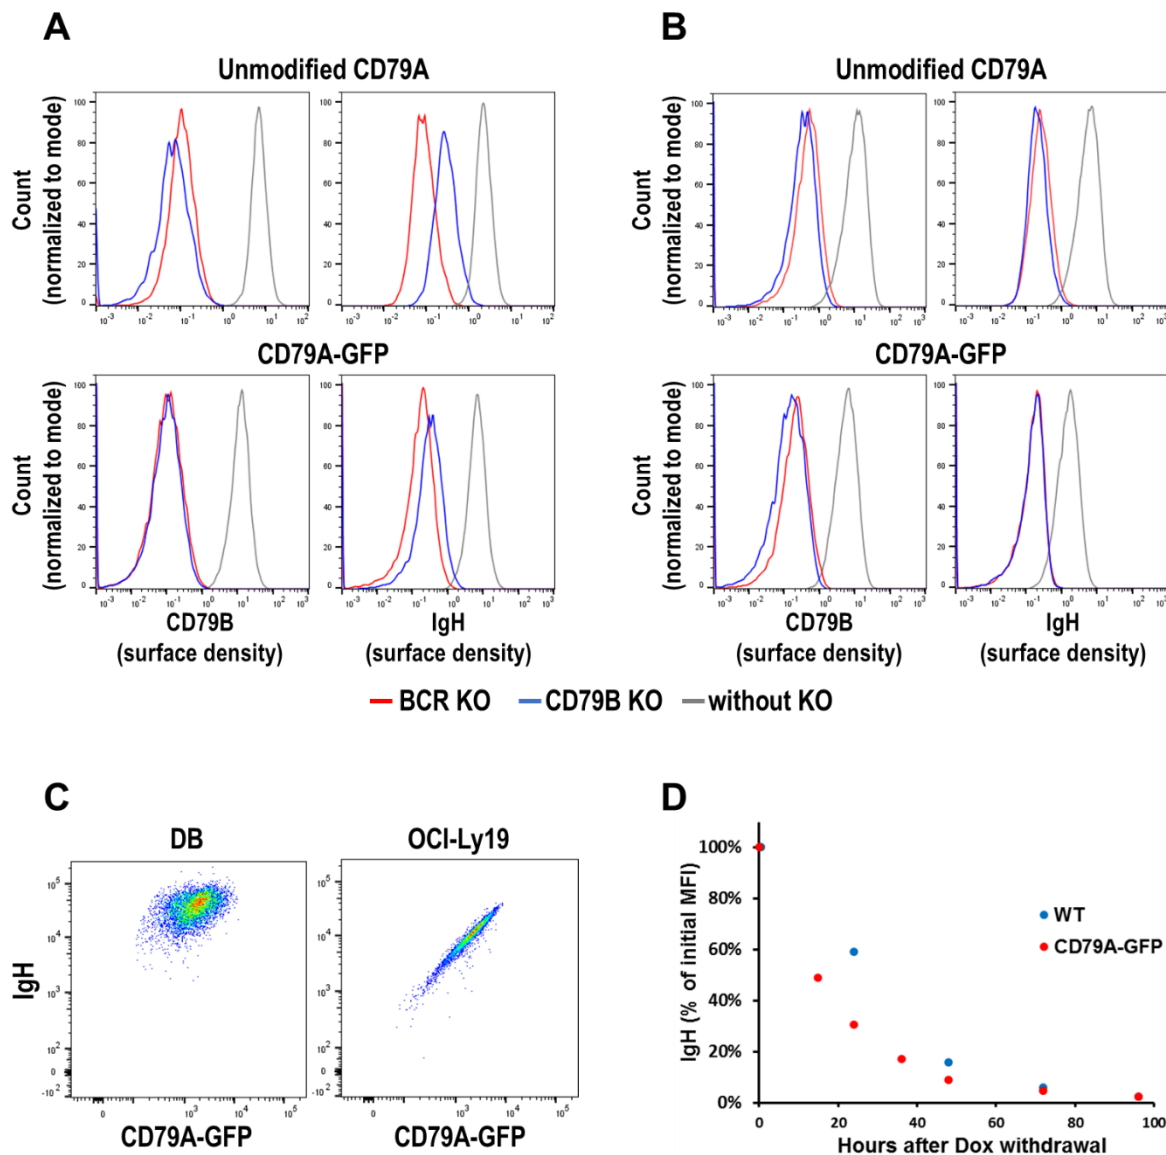

**Figure S26. Effect of CD79A-GFP on surface expression of BCR components by GCB-DLBCL lines**

(A) The surface expression of BCR components CD79B (left panels) and IgH (right panels), normalized to per-cell squared FSC values to yield surface density, were examined without (gray) or with KO of CD79B (blue) or IgH (red) in cell line DB that was either otherwise-unmodified (top panels) or had undergone knock-in to fuse GFP to unmutated CD79A (bottom panels). CD79A-GFP fusion eliminates residual surface CD79B that is still present after IgH KO in otherwise-unmodified cells (left panels), and reduces residual surface IgH that is still present after CD79B KO (right panels).

(B) Results of an experiment identical to the one shown in (A), except that it was performed in the cell line SUDHL-6. There is no difference between unmodified and GFP-fused CD79A in the amount of residual surface CD79B still present after IgH KO, and there is no residual surface IgH present after CD79B KO.

(C) Two-parameter dot plot of IgH surface staining vs. CD79A-GFP fluorescence in cells that had undergone knock-in to fuse GFP to unmutated CD79A. Whereas the OCI-Ly19 cell line (right) shows very tight correlation between per-cell levels of surface IgH and CD79A-GFP, representative of most GCB-DLBCL lines, cell line DB (left) displays a “cloud” of less-correlated values. Since IgH and CD79A-GFP are translated from independent gene loci in both cell lines, this suggests highly-coordinated post-translational regulation of amounts of these proteins in OCI-Ly19, but some degree of independence in DB.

(D) Time course of disappearance of surface IgH after doxycycline (Dox) withdrawal from OCI-Ly19 cells with Dox-inducible IgH, either without CD79A modification (blue, as used in Figure 6) or that had undergone knock-in to fuse GFP to unmutated CD79A (red, as used in Supplementary Figure S23). Disappearance is more rapid in cells with CD79A-GFP fusion.



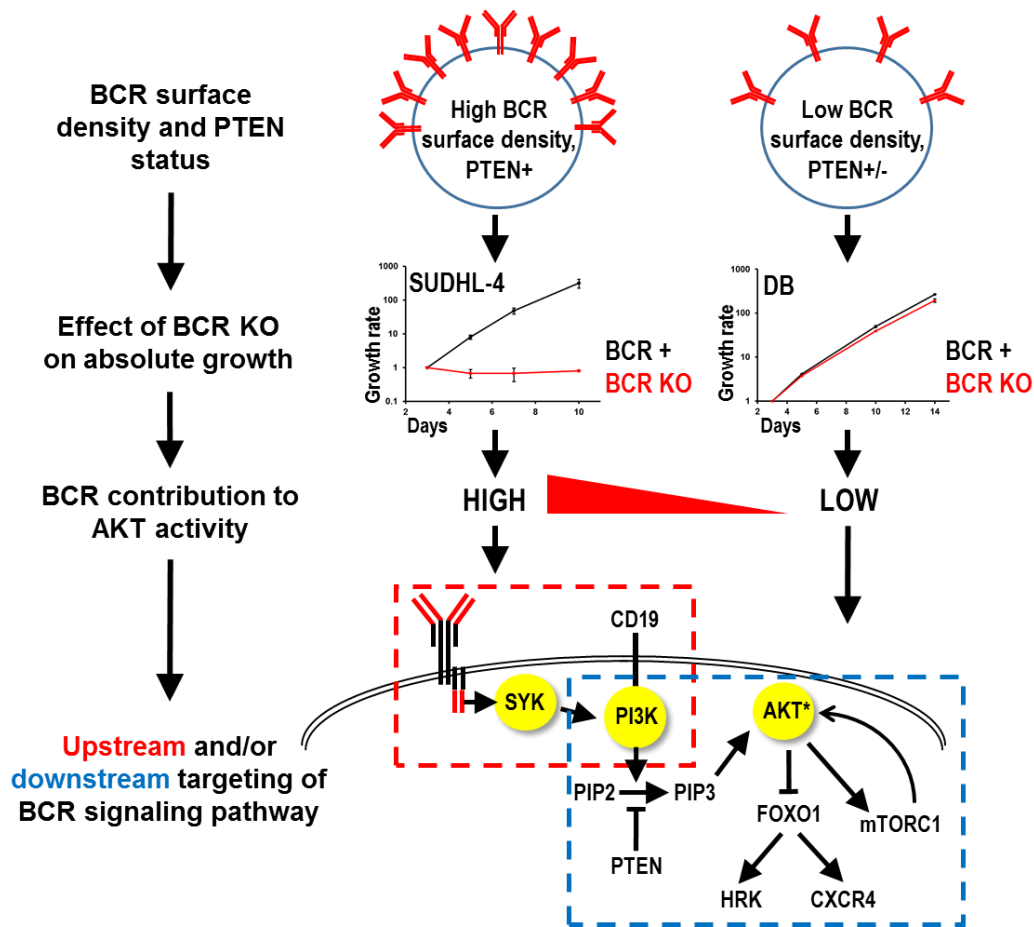

**Figure S27. Potential biomarker-guided strategy for targeted therapy of GCB-DLBCL**

The schematic illustrates implications of findings from studies of GCB-DLBCL lines. If primary GCB-DLBCL tumors similarly utilize tonic BCR signaling to activate AKT, patients with higher surface BCR density may be more likely to respond to inhibitors of tonic BCR signaling at upstream points. PTEN deficiency may be a biomarker indicating low likelihood of responding to upstream inhibitors of tonic BCR signaling. Downstream inhibition of AKT may synergize with upstream inhibitors and be more widely effective in GCB-DLBCL.

## SEQUENCES

## Sequences of BCR hypervariable regions of individual cell lines as sequenced from gDNA

Exons are highlighted in bold, all other characteristics of hypervariable regions are marked as follows:

Translation initiation

Splice donor/acceptor sites

First amino-acid of mature peptide

Junction

J region

HBL-1 H-HVR

IGHV4-34, D3-10, J4

ACCAGTCTCCTTCAGCACATTTCTACCTGGAAGAAGAGGACTCTGGGTTTGGTGAGGGGAGGCCACAGGAAGAGAAGCTG  
 AGTTCTCAGAGGGCACAGCCAGCATAACCTCCCAGGGTGAGCCAAAAGACTGGGGCCTCCCTCATCCCTTTTTACCT  
 ATCCATACAAAGGCACCACCCACATGCAAATCCTCACTTAGGCACCCACAGGAAATGACTACACATTTCTTAAATTCA  
 GGGTCCAGCTCACATGGGAAGTGC~~TTTCTGAGAGT~~CATGGACCTCCTGCACAAGAACATGAAACACCTGTGGTTCCTTC  
 TCCTCCTGGTGGCAGCTCCCGGATGTGAGTGTCTCAGGAATGCGGATATGAAGATATGAGATGCTGCCTCTGATCCCAG  
 GACTCACTGTGGGTTTCTCTGTTCCACAGGGTCCCTGTCCAGGTGCAGCTACAGCAGTGGGGCGCAGGACTGTTGAAGC  
 CTTCCGAGACCTGTCCCTCACTTGCCTGTCTATGGTGGGTCTTCAGTGATTACTACTGGACCTGGATCCGTCAGTC  
 CCCAGGAAAGGGGCTGGAGTGGATTGGGGAAATCAATCGTAGTGGAAGTACCGACTACAACCCGTCCCTCAAGAGTCGA  
 GTCACCATATCACTAGACACGTCCAAGAACCAATTCTCCCTGCATCTGACCTCTGTGACCCGCCGGACACGGCTCTAT  
 ATTACTGTGCGGGGGACAAGACTACGGTACTATGTTAGGGGGGGTAGTGACTACTGGGGCCAGGGAACCTGGTCCAC  
 CGTCTCCTCAGGTGAGTCCACACAGTCTCTCCTGGTTAACTCTGAAGGGTTTTATTGTATTATTGGGGGAAGTTC  
 GGGTGTGGGTCTCCTGCCAGGAGAACCCCGGAGCAGTCTGGGTGACTCAAGAGGATGCCCTGAGGCAACCCGACCCAC  
 ACAGACGAGGGCAAGGGCTCCAGATGTTCTCTCCTGAGCCCAACAATACTAATCTCTGTGGCCAGGGCCACCC  
 TAGGCCTCTGGGGTCCAATGCCGACAATCCCCGGGCCCTCCCC

HBL-1 L-HVR

IGKV3-20, J3

AGGAAAGATCACTAACAAGTAAATACAAGTATATCCGGAGAATAAAGTTGTAATAGACTCTTCCTTTCAACCTGATCCA  
 TCATGCATTTAGGGAGCTGACTGGGCACAAGTTGGAGCAGAAAGAGAAAAATGAAACCACAGCCTTCTATTTTGTCTTCT  
 AACAGACTTGTACCAAACATTCTGTGGCTCAATCTAGGTGATGGTGAGACAAGAGGACACAGGGGTTAAATTTCTGTGGC  
 CGCAGGGGAGAAGTTCTACCCTCAGACTGAGCCAACGGCCTTTTCTGGCCTGATCACCTGGGCATGGGCTGCTGAGAGC  
 AGAAAGGGGAGGCAGATTGTCTCTGCAGCTGCAAGCCCAGCACCCGCCAGCTGCTTTGCATGTCCCTCCAGCCGCC  
 CTGCAGTCCAGAGCCCATATCAATGCCTGGGTGAGAGCTCTGGAGAAGAGCTGCTCAGTTAGGACCCAGAGGGAACCAT  
 GGAAACCCAGCGCAGCTTCTCTTCTCCTGCTACTCTGGCTCCAGGTGAGGGGAACATGGGATGGTTTTGCATGTCA  
 GTGAAAACCCCTCTCAAGTCTGTACCTGGCAACTCTGCTCAGTCAATAACAATAAAGCTCTGTATAAAGCAATAA  
 TTCTGGCTCTTCTGGGAAGACAATGGGTTTGATTTAGATTACATGGGTGACTTTTCTGTTTTATTTCCAATCTCAGATA  
 CCACCGGAGAAATGTGTTGACGCAGTCTCCAGGCACCCTGTCTTTGTCTCCAGGGGAAAGAGCCACCCTCTCCTGCAG  
 GGCCAGTCAGAGTATTAGCAGCAACTACTTAGCCTGGTTCAGCTGAAAGGTGGCCAGGCTCCAGGCTCCTCATCTTT  
 GGTGCATCCAACAGGGCCACTGGCATCCAGACAGGTTGAGTGGCAGTGGGTCTGGGACAGACTTCACTCTCACCATCA  
 GCAGACTGGAGCCTGAAGATTTTGCAGTGTATTACTGTGAGCAGTATGGTAGCTCACCGATCACTTTCCGGCCCTGGGAC  
 CAAAGTGGATATCAAACGTAAAGTACATCTGTCTCAATTATTCGTGAGATTTTAGTGCCATTGGATCATTTGTGCAAATT  
 TTGTGATATTTTGGTTGAATAAACCTGGTGACCCAGAAGTAAATAGCAGGACACCAGAAAATGAACTTAAAAATCTGAG  
 CAAATAGACGAATCATTGGGTTTGGAGAGGAGAATAGGATTCATGGGGGAAATGGGGAAGAAAATAGCTAGATTTTCTCT  
 GAACAAGCAGCCTATCTCGTATGATTGGCTTCAAGAGAAGTTTTTGTGAGGGGAAAGGGTGAGATCCCTCACTGTGAC  
 TCACTTTCGGCGGAGGGACCAAGGTGGAGATCAAACATAAGTGCACTTTCTAATGCTTTTTCTTATAAGGTTTTAAAT  
 TTGGAGCATTTTTGTGTTTGGAGATATTAGCTCAGGTCAATTCCAAAGAGTACCAGATTCCTTCAAAGAGTCAAGATTTT  
 AAGGGATAGAAAATTAGTTCATCTTAAGGAACAGCCAAGCGCTAGCCAGTTAAGTGGGATCTCAATTGCAAGATTTT  
 GTCTGCATCGGTGAGTTAGTGAGATTAACAGCGAAAAGAGATTTTTGTTAAGGGGAAAGTAATTAAGTTAACACTGTG  
 GATCACCTTCGGCCAAGGGACACGACTGGAAATTAACGTAAGTAATTTTTCACTACTGTCTTCTGAAATTTGGGTCTG  
 ATGGCCAGTATTGAGTTTTAGAGGCTTAAATAGGAGTTTGGTGAAGATTGGTAAATGAGGGCATTAAAGATTTGCCATG  
 GGTGCAAAAAGTTAAACTCAGCTTCAAAAATGGATTTGGAGAAAAAAGATTAAAGT

**HT H-HVR**

IGHV3-53, D5-24, J4

CTGCCTCCTCCAGTGGTTAGAGCACAGGCCAGGTAATAGGACTCATTTTTTTTAGATGTGTAATTTTTAGACACACTGCA  
 CAACTGCTGTGTTCTCTGTGCAAATTATCTCCTGTAAAATGTAACATTGAAACCTGCCTTAAATATATTGTGTAATAT  
 GTAAAAATAAAATCAGATTGTGAGAGCTAAATGCTAATCAAGGCGCAATCACGTAATATAACAATTATATTTTCTGAAT  
 GATGGAATTAATACCAATCTCCCCAGGACACTTCATCTGCACGGAGCCCGCCTCTCCTCAGATGTCCACCCAGAG  
 CTTGCTATATAGTCGGGGACATGCAAATAGGGCCCTCCCTCTGCTGATGAAAACCAGCCCAGCTGACCCTGCAGCTCTG  
 GGAGAGGAGCCAGCAGTGGGATTCCGAGGTGTTTCATTGATGATCAGCACTGAACACAGAGGACTCACCATGGAGT  
 TTTGGCTGAGCTGGGTTTTCTTGTGCTTTTTCAAAGGTAAATTCATGGAGAAGTACGAGAAATCGAGTGTGAGTGGAC  
 ACGAGTGAGAGAAACAGTGGATATGTGTGGCTCTTTCTAACCAATGTCTCTGTGTTTGCAGGTGTCCAGTCTGGGTGC  
 AGTTGGTGGAGACTGGAGGAGGCTTGTTCAGCCGGGGGAGTCCCTGAGACTCTCCTGTGCAACCTCTGACTTCACCGT  
 CAGTAACAACACTACATGGCCTGGGTCCGCCAGGCTCCAGGGAAGGACTGAATTGGGTCTCACTTATCTCTGCCGTGGT  
 GTCACATTCTACGCAGACTCCGTGAAGGGCCGATTCTCCATTTCCCGAGACAACCTCCAAGAACACACTATATCTTCAA  
 TGACCAGCCTGAGAGCCGAGGACACGGCCATGTATTACTGTGCGAGAGCATCTTTTGAACAACCTAACCTACTTTGAC  
 TCCTGGAGTCAGGGAACCTGGTCACCGTCTCCTCAGGTGAGTCTCAGAACCCTCTCTCGGGGTCTGCTTCTGAAGGAT  
 ATTGCTACATTTTCGGGGAATAAAGGATGCTGGGTACCTGGCCAGACAGACGCGGACCACCCTGGGGGTCTCAGGA  
 GGAGGCCCTGAGGCAACAGCGGCCGCACAGACGAGGTACAAGGACTCCAGATGTCCCTTCCCTCCAGAGCCCAAAACCAC  
 GGGTCTCTCTGTGCCTAGGACCACCCTAGGCCTCTGGGGTCCAATGTCCCAAGTCCCGGGCCCTCCCCGGCCTCAGT  
 CTAGAGGGTCCCAGGGACGTGGCGGGGCGCCCGTTCTTGCTGGGGTCTGGCACTATTGTTACATTGTGACAGCTGA  
 TTCGACCCCTGGGGCCAGGGAACCCGGTGAGTCTCACCACCCCTCTCTGAGTCCACTTAGGGAGACTCAGGTTGCCA  
 GGGTCTAGGGGTGAGAGTCTTGAGGCATTTTGGACGTGAGGAAAAAAGCTGGGGAGAGGGACCCTTCGAATGGGAAG  
 TCGCCTGTCTCCCAAGTCCGCCACAGATGTCGGCAACTGGGGCCCTCCTTCGGCTGGTCTGGGGTGACCTCTCTC  
 CGCTTACCTGGAGCATTCTCAGGGGTGTCGTGATGAGTGCAGGTCGACTCTGTCCCGCTCCAAGGCACCCGCTCT  
 CTGGGACGGGTGCCCCCGGGGTTTTTGGACTCCTGGGGGTGACTGAGTAGCCGTCTGCTTGCAGTTGGACTTCCAGG  
 CCGACAG

**Note:** **TC** - highlighted codon with deletion causing frame shift and premature termination of translation in HT cell line.

**OCI-Ly7 H-HVR**

IGHV1-69, D6-19, J4

CTCTCCATGGGTCTGCTGGACACTCATGTAGGGTAACGAGTGGCCACCTTTTTCAGTGTACCAGTGAGCTCTGAGTGT  
 TCCTAATGGGACCAGGATGGGTCTAGGTGCTCAATGTCAGAGACAACAATGGTCCCACAAAAAACCAGGTAATC  
 TTTAGGCCAATAAAATGTGGGTTCACAGTGAGGAGTGCATCCTGGGGTTGGGTTTTGTTCTGCAGCGGGAAGAGCGCTG  
 TGCACAGAAAGCTTAGAAATGGGGCAAGAGATGCTTTTCTCAGGCAGGATTTAGGGCTTGGTCTCTCAGCATCCCACA  
 CTTGTACAGCTGATGTGGCATCTGTGTTTTCTTCTCATCGTAGATCAGGCTTTGAGCTGTGAAATACCCTGCCTCATG  
 CATATGCAAATAACCTGAGGTCTTCTGAGATAAATATAGATATATTGGTGCCTGAGAGCATCACATAACAACCACATT  
 CCTCCTCTAAAGAAGCCCCTGGGAGCACAGCTCATCACCATGGACTGGACCTGGAGTTCTCTTTGTGGTGGCAGCAG  
 CTACAGCTAAGGGGCTTCCCTAGTCCTAAGGCTGAGGAAGGGATCCTGGTTTAGTTAAAGAGGATTTTATTACCCCTGT  
 GTCTCTCCACAGGTGTCCAGTCCAGGTACAGTTGGTGCAGTCTGGGGCTGAGGTGAAGAAGCCTGGGTCTCGGTGA  
 ATGTCTCCTGCAAGACTTCTAGAGACACCTTCAGCAGCTATGCTATCAACTGGGTGCGACAGGCCCTGGACAAGGGTT  
 TGAGTGGATGGGAGGGATCATCCCTATCGTTGGTACAGCAAACCTACACACAGAAGTTCAGGGCAGAGTCACGATTACC  
 GCGGACGAATCCACGAGCACAACCTACATGGAACCTGAGCAGCCTGACATATGAAGACACGGCCGTTTATTACTGTGTGA  
 CCGGCCCGGGGGGCTGTTTGGAGTGCATGGGGCCAGGGAATCCTGGTCAACGCTCTCCTCAGGTGAGTCTCATAATC  
 TATCATAATGTAGGATTTTGGTGCCTTTTTGGGGGAAATAAAGGTCTGGGTCTCCTGCCAAGAAAGACCCGGAGCAG  
 CCGGGGGGGGCTCAGGAGGATGCCCTGGGGCAACAGCGGACACGCAGACGAGGGTCAAGGGCTCCAGAAGCCCCTTCT  
 CCTGAGGCCGACAGCGGGTCTCTCTGTGGCCAGGGCCACCCTAGGCCTCTGGGGTCCAATGCCAACAACCCCGGG  
 CCTCCCCGGGTTCACTCTGAGAGGGTCCCAGGGACGTGGCGGGGCGCCAGTCTTGCCTGGGGTCTTGACATTGTTGT  
 CACAATGTGACAACCTGGTTCGACCCCTGGGGCCAGGGAACCTGGTCAACGCTCTCCTCAGGTGAGTCTCACCACCCCT  
 TCTGTGAGTCCACTTAGGGAGACTCAGCTTGCCAGGGTCTCAGGGTCAAGTCTTGGAGGCATTTTGGAGGTGAGGAAA  
 GAAAGCGGGGAGAGGGACCCTTCGAATGGGAATTCAGCCTGTCTCCCCAAGTCCGGCCACAGACGTCCGCAGCTGGG  
 GGGTCTCTTCGGCTGGTCTGGGGTGACCTCTCTCCGTTACCTGGAGCATCTCAGGGGCTGTCTGTCTGTCCCGCTCC  
 AAGGCACCCGCTCTCTGGGACGGGTGCCCCCGGGGTTTTTGGACTCCGGGGGGTACTTAGCAGCCGTCTGCTTGCAA  
 TTGGACTTCCCAGGCCGACAGTGGTCTGGCTCTGAGGGGTGAGGCCAGAATGTGGGGTCCGTGGGAGGCCAGCAGAGG  
 CTTCATGAGAAGGACAGGACAGGGCCACGGACAGTCACTTCCATGTGACGCCCGGAGACAGAAGGTCTCTGGGTGGC  
 TGGGTTTTTGTGGGGTGGAGGATGGACATTCTGCCATTGTGATTAATACTACTATTACGGTATGGACGTCTGGGGCCAA

GGGACCACGGTCACCGTCTCCTCAGGTAAGAATGGCCACTCTAGGGCCTTTGTTTTCTGCTACTGCCTGTGGGGTTTCT  
 TGAGTATTGTAGGTTGGTCCCTCGGGGCATGTTCCGAGGGGACCTGGGCGGACTGGCCAGGAGGGGACGGGCACTGGGGT  
 GCCTTGAGGATCTGGGAGCCTCTGTGGATTTTCCGATGCCTTTGGAAAATGGGACTCAGGTTGGGTGCGTCTGATGGAG  
 TAACTGAGCCTGGGGGCTTGGGGAGCCACATTTGGACGAGATGCCTGAACAAACCAGGGGTCTTAGTGATGGCTGAGGA  
 ATGTGTCTCAGGAGCGGTGTCTGTAGGACTGCAAGATCGCTGCACAGCAGCGAATCGTGAAAATATTTTCTTTAGAGTTA  
 TGAGGTGCGCTGTGTGTCAACCTGCATCTTAAATTCTTTATTGGCTGGAAAGAGAAGTGTGCGGAGTGGGTGAATCCAGC  
 CAGGAGGGACGCGTAGCCCCGGTCTTGATGAGAGCAGGGTTGGGGCAGGGGTAGCCCAGAAACGGTGGCTGCCGTCTC  
 GACAGGGG

### Ly7 L-HVR

IGKV4-1, J1

AATGTTGCTGAGCAGGCATTGAAGAGTATCGATAAAAATTTATTGAGAATTTGTTTATTATGATTAACAGAGGTAAAAGC  
 CAGTATATTACTGATTAATATAGGTAAGGCGAGTTAAGAAAATGGGAATGCTTTCTCTTCTGCTTTCTTCTACGATGC  
 ACAAGGCGTTTTACATTTATGCCCCTATGAAAATTACTAGGCTGTCCTAGTCATTAGATCTTTCAGCAGTTTGTAGTTT  
 TAGAGCTTCTAAGTTGACTTCTGTCTTTTCTATTTCATACAATTACACATTCTGTGATGATATTTTGGCTCTTGATTTA  
**CATTGGGTACTTTACAAACCCTGCTCATGAAATTTGCTTTTGTACTACTGGTTGTTTTTGCATAGGCCCTCCAGG**  
**CCACGACCAGCTGTTTGGATTTTATAAACGGGCCGTTTGCATTGTGAAGTACTGAGCTACAACAGGCAGGCAGGGGCAGCAA**  
**GATGGTGTTCAGACCCAGGCTTTCATTTCTCTGTTGCTCTGGATCTCTG**GTGAGGAATTA AAAAGTGCCACAGTCTTT  
 TCAGAGTAATATCTGTGTAGAAAATAAAAAAATTAAGATATAGTTGGAAATAATGACTATTTCCAATATGGATCCAATT  
 ATCTGCTGACTTATAATACTACTAGAAAGCAAATTTAAATGACATATTTCAATTATATGTGAGACAGCGTGTATAAGTT  
 TATGTATAATCATTGTCCATTACTGACTACAGTGCCTACGGGGACATCGTGATGACCCAGTCTCCAGACTCCCTGGCT  
**GTGCTCTGGGCGAGAGGGCCACCATCAACTGCAAGTCCAGCCAGACTGTTTTATACGGCTCCAACAATAAAAACACTACT**  
**TAGCTTGGTACCAACAGAAACCAGGACAGCCTCCTAAGTTGCTCATTTACTGGGCATCTACCCGGGAATCCGGGGTCCC**  
**TGACCGATTAGTGGCAGCGGGTCTGGGACAGATTTAGTCTCACCATCAGCAGCCTGCAGGCTGAAGATGTGGCAGTT**  
**TATTACTGTAGCAATATTATAGTAACCCCTGGACGTTCCGGCAAGGGACCAAGGTGGAAATCAAAC**GTGAGTAGAATT  
 TAACTTTGCTTCTCAGTTGTCTGTGTCTTCTGTTCCCTGTGTCTATGAAGTGATCTATAAGTCGACTCTGCAATCAG  
 CCTCTGATATCCTTCAGGGAAAAGATAAAGATAAGTCTGTAGTCAAACCTCGAGAATTGATTGCACATTTTCTTTGAAGA  
 GCAAGCAAGATTAGTCAATTGGGTGAGAATAACTTGTCTAAGGAATAGCTTCAGAAATGTCTGGGGAACAAAACATGT  
 TCTGGACAGAGCCTTGGTCAATTGTGAGAAAGGGAGTTTTTGTCTAGGAGGGAACCTAAGAGGAACCATCGTGTGTACA  
 CTTTTGGCCAGGGGACCAAGCTGGAGATCAAACGTTAGTACTTTTTTTTCACTGATTCTTCACTGTTTCCCTAATTAGTTTA  
 CTTTGTGTTCCCTTGTGTGGATTTTCATTAGTCGGATGCCAGGGATCTAACAAAC

### OCI-Ly19 H-HVR

IGHV3-48, D3-10, J4

GAGTATTGTCTCCTACAGAACATAGTTTACATGAATATTTAAAATGAAATAGGGTGATTAGTGCAAAGTGTTTATCACA  
 GCACAATTTTATAATAAGACAGCATATTTTCCAAACGCAATCATTGCCAGCAAACCTCCACAGGGCACCGTCTCTTAT  
 CTGGGTACAGCCTACTCCTCAAGGGTCCCACCCTAGAGCTTGGTTTATAGTAGGAGATTTGCAAGTAGGGCCCTCCCTC  
 TACTGATGAAAGCCAACCCCAACCTGACCCTGCAGCTCTCAGAGAGGTGCCTTAGCCCTGGATTCCAAGGCATTTCCAC  
**TTGGTGATCAGCACTGAACACAGAGGACTCACC**ATGAAGTTGGGGCTGTGCTGGGTTTTCTTGTGGTATTTAGAAG  
**GT**GATTTCATGGAAAAGTAGAGAGATTTAGTGTGTGGATATGAATGAGACAAACAGTGGATATGTGTGGCAGTTTCTG  
 ATTTTGGTGTCTCTTTGTTTGCAGTGTGAGTTGAGTTGGTGGAGTCTGGGGGAGGGTTGGTACAGCCTGG  
**GGGGTCTTTGAGACTCTCCTGTGAAGTCTCTGGATTACCTTCAATACCTATACTATGAGCTGGGTCCGCCAGGCTCCA**  
**GGTAAGGGGCTGGAGTGGGTTTCAAATATTAGTAGTAGTAGTAGTGCATATACTATGCAGGCTCTGTGAAGGGCCGAT**  
**TCATCATCTCCAGAGACAATGCCAAAACCTATTATATCTGCAAATGAACAACCTGAGAGCCGAGGACACGGCTGTCTA**  
**TTTCTGTGCGCGAGCGTCTTATGATTCGGGGACTTATTTCCACGACTACTGGGGCCAGGGAACCTGGTCAACCGTCTCC**  
**TCAGGT**GAGTCTCACAACGCTCATTACTTTAAGTCTGAAGCCTTTTTCTGTATTTTTGGGGGAAATACGGGTGCT  
 GGGTCTCCTGCCTAGAGAGCCCCGGATCAGCCTGGGAGGCTCAGGAGGACGCCCTGAGGCAACACCGACCACAGGACG  
 AGGGGCAAGGGCTCCAGATGTTCTTCTCGTGAGCCAGTAGTGCGGGTTTCTGTGTGGCCAGGGCCACCTAGGCCT  
 CTGGGGTCCAATGTCTAACAAACACCCGGGCCCTCCCCGGG

### Ly19 L-HVR

IGKV1-39, J1

AAAGACCATGTGACAATCACAGAGGTGTTGTTACTATAGCAAAAGGGATTGTTACTCTCACATCCCTTTAAGTAACTTG  
 AAGGcCTGATAGACCCACCCTCTAAGACTTCATTAGACATTCCTACGAATGGTTATACTCTCCTGTATACTCCCAATA  
 CAACTCTAAAATATATTATTCATATAGTCCCTAGGTTTGTATTAAGTTTACTTTTTTCTTCAAATATCTCTTGT  
 CACAACAGCGGCTCTAGAGAGAAATACATTCCTCCAGGCAAATCTATGCTGCGTGGTCTGACCTGGGACCTGGGGA

CATTGCCCTGTGCTGAGTTACTAAGATGAGCCAGCCCTGCAGCTGTGCTCAGCCTGCCCCATGCCCTGCTGATTGATT  
 TGCATGTTCCAGAGCACAGCCTCCTGCCCTGAAGACTTTTTTATGGGCTGGTCGCACCCTGTGCAGGAGTCAGTCTCAG  
**TCAGGACACAGCATCGACATGAGGGTCCCCGCTCAGCTCCTGGGGCTCCTGCTACTCTGGCTCCGAGGT**AAGGATGGAG  
 AACACTAGGAATTTACTCAGCCAGTGTACTCAGTACTGACCGGAACCTCAGGGAAAATCTCTGATAACATGATTAGTAG  
 TAAAAATCTTTGTTTTTATGTTTTCACTTTCAGGTGCCAGATGTGACATCCAGATGACCCAGTCTCCCTCGTCCCTGTC  
**AGCATCTGTAGGAGACAGAGTCACATCACTTGCCGGGCAAGTCAGAATATTAGGACCAATTTAAATTGGTATCAACAA**  
**AAACCAGGGAGGGCCCCCTAAGGTCCTGATCTATGCCGCTTCCAGTTTGCAAAGTGGAGTCCCATCAAGATTCAGTGGCA**  
**GTGGATCTGGGACATATTTCACTCTCACCATTAGCAGTCTGCAGCCTGAGGATTTTGCAACTTTCTATTGTCAACAGAC**  
**GTACAGTTTCGTCGTGGACGTTTCGGCCAAGGGACCAAGGTGGAAATCAGACGT**GAGTGGGATTTACACTTTGTTTCTTCA  
 CTTGTCTGTGCTTTTTGTTCCCTGTGTCTATGAAGTGATATATAAGGTTAGTCTAGAAGCAGTCTGTGACATCCTTCAG  
 GGAAAAGGTTGATAAGTCTGGAATCAAACCTCGAAAATTGATTACACATTTTTTTGAGGAATAATCAACCTTCAGGCA  
 TTGGGTGAGAATAAGTCGTCTACGTAATAATTTAGAGATGTCTGGGGAAACATAACATGTTCTGGACAGAACCTTGGTC  
 AATTGTCACAAAGGGAATTTTTGCATAGGAGGCAAAGTAAGTGGAAACCAACGTGTATACACTTTTGGCCAGGGGACCAA  
 GGTGGAGATCACACGTAAGTACTTTTGTCTACTGATTCTTCACTGTTCTTGTGAGTTTACTTTGTGTTCTGTGTG  
 AATTTTCAAAGTCGGATGCCAGGGATCT

#### **SUDHL4 H-HVR**

IGHV4-59, D5-18, J4

CTCCACGGGTCACACATTGAGAAGGATGTAGATATGTCCCCTACCTTCTCCTGAGATCTCAGACAGAATCCCAAATTC  
 AAAAGGACACAGAAGGACAGCTCTCAGGTGGTTTTAAAAAATGACCCACTTCCAGGGACAGGGAGCTTCCCTATAACCA  
 TGGTGGATGTTCTGAACTACAATAAACATTGGATGGATCCAGGATTGTTTGAAGTCACTGTCATTATTACATTCAGCTG  
 CTGTTTCAATGTTTCTGAAGTAGTAAATGACAATTTATATGACAAGTTATATGAATCTTCAAGGGTAGAACAATATTGA  
 CCATATTTCCAAAATCTGTCTTGTATCCATGATCACACTCATCTCCAGACCAGGTCCTTCCAGCACGTCTATTTACCTGA  
 AAGAAGAGGACTCTGGGCTTGGAGAGGGGAGACCCCAAGAAGACAACCTGAGTCTCAAAGGGCACAGCCAGCATCCTAC  
 TCCAGGGCGAGCCCAAAGACTGGGGCCTCCCTCCTCCTTTTTCACCTCTCCAGACAAAGGCACCACCCACATGCAAA  
**TCCTCACTTAAGCACCCACAGGAAACCACCACACATTTCTTAAATTCAGGGTCCAGCTCACATGGGAAATACTTTCTG**  
**AGAGTCTGGACCTCCTGTGCAAGAACAATGAAACATCTGTGGTTCTTCTTCTCGTGGTGGCAGCTCCAGATGT**GAGT  
 GTCTCAGGGATCCAGACATGGGGATATGGGAGGCGCCTCTGATCCAGGGCTCACTGTGGGTCTCTCTGTTCAAGGGG  
**TCCTGTCCAGATGCACCTGCAGGCGTCGGGCCGGGACTGCTGAAGCCTTCGGAGACCCTGTCCCTCACCTGCCTGT**  
**CTCTGGTGGCTCCATCAGTAGTTACTCCTGGACTTGGATCCGGCAGCCCCAGGGAGGGGGCTAGAGTGGATTGGGAAT**  
**ATCTCTTATAGTAAACCGACTACAATCCCTCCCTCAAGAGTCGAGTCACCATGTCACTGGACATGTCCAAGAATGAGT**  
**TCTCCCTGAAGTTGGGCTCTGTGACCGCCGCTGACACGGCCATCTATTACTGCGCGAGACGGAGCCCTGATTACGGGCA**  
**CAACTTTGACTTCTGGGGCCAGGGAACCCTGGTACCCTCTCCTCCG**GTGAGTCCCCACAACCTATTCTCACTCTGAGGA  
 TTTTGTGCTTTTTTTGGGGAAACATCAGTGTGCGGCTTCTCCTCCCAAGAGAGCCCCGGAGGAGCCTGGGGGACCCAGG  
 AAAATGTCTGAGACAACAGCGCCACACAGTCGAGAGACAAGGGCTCCAGATGTTCCCCCTAATATCAGTGTGTCTG  
 TGCCAGGGTCACCCTGGGCTCCTCCGGTCCAATGTCCGACAACCCCCGGGCCCTCTCCGGCCTCAGTCTGAGAGGCTC  
 CCAGGGACTTAGGGGGTGACATTTTTGCCTGGGGTCTTGGCATTCTTGTACGATGTGACACCTGGTTCGACCCCCGG  
 GGCCAGGGAGTCTGGTACGGTGAGTCTCACCACCCCTGTCTGACTCCACCTAGGAAGACTCAGGTTCTCGGGTC  
 TCAGGGTCACAGTATTGGAGGCATTTTGGAGGTCAGGAAAAAACCTGGGGAGAGGGACCCCTCGATTGGCAACCCAGA  
 CTGTCTTCCCAGGTCTGGCCAGAGATGTGACAGCGGGGGGGCTCCTTCGGCTGGTCTGGGGTGACCTCTCCCCGCT  
 CACTGGAGCATCTCGGGGGCTGTCTGATGATTGCGGGGTGGGACTCTGCCCCAGTCCAAGGCACCCGCTCTCTGGG  
 GCGGGTGCCCCCGGGGTTTTTGGACTCCTGGGGGTGACGTAGCAGCCGCTCTGGTTGCAGTTGGACTTCCCAGGCCGA  
 CAGTGGTCAGGCTTCTGAGGGGTCAGGCCAGAAATGTGGGGTACGTGGGAGGCCAGCAGAGGGTTCCATGAGAAGGGCAG  
 GACAGGGCCACGGACAGTCAGCTTCCATGTGACGTCCGGAGACAGAAGGTCTCTGGGTGGCTGGGTTTTTTGTGGGGTGA  
 GGATGGACATTTGCCATTTGATTTCCACTACTTCTACTACATGGACGTCTGGGGCAAAGTGGGACTCAGGTTGGGGT  
 CGTCTGATGGAGTAACTGAGCCTGGGGGCTTGGGGAGCCACATTTGGACGAGATGCCTGAACAAACCAGGGGTCTTGGT  
 GATGGCTGAGGAATGTGTCTCAGGAGCGATGTCTGTAGGACTGCAAGATCGCTGCACAGCAGCGAATCGTGAAATATTT  
 TCTTTATAATTATGAGGTGCGCTGTGTGTCAACCTGCATCTTAAATCTTTTATTGGCTGGAAAGAGAAGTGTGCGGAGTG  
 GGTGAATCCAGCCAGGAGGGACGCTAGCCCCGCTTGTATGAGAGCAGGGTTGGGGGCAGGGGTAGCCAGAAACGGT  
 GGCT

#### **SUDHL-4 L-HVR**

IGKV2-28, J4

CAGATACCAGACCACTCTTGAAGTGGCTCAAGACTATGTTTTATTTGTAGGCTGTCTGCTCATCAGTGTCTGTAGGAAA  
 GGGTAAAGTTTTCTTTTTTATGATTAGCTGGGAGGGAGCCAAGAAGAATGGCATTCATCCATATTCATTCTAGACATATC  
 TCTACATTTAGGGTTGTTATGCTTTCCTAGAGTTGCATATCCTATAACAATGGGACCTACCCAAGATCCAAACTGTCA

CAGTCAGATCCTTCCTCCCATTTTATATCACATTGCTCACAGGAGAGACATATCCCCTGCCCGCCTGCCCCATTGACTC  
 TTTCCACACCCTGCATGCACCAGGGGATTTGCATATTGTCCACAGGGAGGACCTTCCCTTGTGAGTCTGAGATAAAA  
 GCTCAGCTGTAACGTGCCTTGACT**GATCAGGACTCCTCAGTTCACCTTCTCACAATGAGGCTCCCTGCTCAGCTCCTG**  
**GGGCTGCTAATGCTCTGGGTCTCTG**GTAAAGAAAAGAAGGAGATGAGGAAGGAGAATAGGGTGGGAGGGTGAGCTCTAGG  
 GCTCCACAGCATCCCATGATCCCATGTTTAGTCTTACCCTGTGTTAGAGGAGCATCATCTGTGCTGTAGAAAAGGGAAC  
 TTGATATTTTGTCTGTGAATAATTAGAAGCCTCATAACTAATATGACGTCTGGTGCTCTGATTAAGATCTTCAAATA  
 TTTAGGTCTCTTATACTTAACAAAAAATTGAATTCATTTTATAGAGTGTGTATTTTAAAGGCATAAATCACTATTTTTATA  
 ATTAAGTTTAAATAAATGACATAAGATGAATTATGAAAATTGCTCATTAGGTTTCTACATCACTTTGCAATTCATTATT  
 TC**AGGCTCCGCTGGGACATTGTGCTGACTCAGTCTCCACTCTCCCTGTCCGTCAACCCTGGAGAGCCGGCCTCCATCT**  
**CCTGCAGGTCTAGTCAAGTCTCCTATATACTAGTGGACAGCATTATTTGAATTGGTACGTCCAGAAGCCAGGGCAGTC**  
**TCCACAACCTCTTGATCTATTTGGTTTCTAATCGGGCCTCCGGGGTCCCTGACAGGTTCCGGTGGCAGTGGATCAGGCACA**  
**GATTTTACACTAAAATCAGCAGAGTGGAGGCTGACGATGTTGGGGTTTATTACTGTATGCAAGCCGTACAACTCCTC**  
**TCACTTTCGGCGGAGGGACCAAGGTGGAGATCAAAC**GTGAGTGCACCTTCATAATGTTTTTCTTATTAAGTTTACAT  
 TTGGAGTGTGTGTGTGAGATATTAGTGCAGGTCAATTCGAAAAGTACCACGTTCTTTCAAAGTACATGAAT  
 AGGGGGATAGAAAAATATTTCTTCTTGAGGAACAGGCAAGCGCTAGCCACTTAAATGAGGCATCCCAATTGCAAGATTC  
 TTTCTGCATCGGTCAGGTCAAGTAAAGTAAACAGCGAAAAGAGAATTCTTTTAAAGAAGAAAAGAAATTAACCTTGACACTGT  
 GGATCACCTTCGGCCAAGGGACACGACTGGAGATTATACGTAAATAATTTTCACTTTTGTCTTCTGAAATTTGCGTCT  
 GATGGCCACTATTGACTTTTAGAGGCTTAAATAGGAGTTTGGTGAAGATTGATAAATGAGGGCATTGAGATTTGCCAT  
 GGGTTGCAAAACTTAACTCAGCTTCAAAAATGGATTTGGGGAAAACAGATTAAATGCTCTAAATGAAATGACACAA  
 AGTAAAAGAAAAAAGTGTGACTAAAAGGAACCCTTGTATTTCTAAGGAGCAAAAGTAAATTTATTTTTGTTCACTCTT  
 GCCAAACATTGTATTGGTTGTTGGTGTCTTATGCATGATACGGAAAGTGGAAAAATATATTTTTTAGTCTTTCTCCCTTT  
 TGTTTGATAAATATTTTTGTGCGACAACAATAAAAATCAGTAGCACGCCCTAAGAAAATCAGGGAAAAGTGAACATA  
 CCTATTTGCTATGTAGAAGAGGCAGCATACTTAAAATCAGCAGCAGTGATGTTTTTAGAG

#### **SUDHL6 H-HVR**

IGHV3-48, D4-23, J4

TGGGTTTACTTCCACTTCTGTAATGGAGAAAATATTGTCTCCTACAGAACATAGTTTACATGAATATTTAAAATGAAA  
 TAGGGTGATTAGTGCAAAGTGTATATCACAGCACAAATTCATAATAAGACAGCATATTTTCAAATGCAATCATTGCCA  
 GCAAACCTTCTACAGGGCACCGTCTTATCTGGGTACAGCCTACTCCTCAAGGGTCCCACCCTAGAGCTTGCTATATA  
 GTAGGAGATATGCAAATAGGGCCCTCCCTCTACTGATGAAAACCAACCAACCCTGACCCTGC**AGCTCTCAGAGAGGTG**  
**CCTTAGCCCTGGATTCCAAGGCATTTCCACTTGGTGATCAGCACTGAACACAGAGGACTCACC**ATGGAGTTGGGGCTGT  
**GCTGGGTTTTCTTGTGCTATTTTAGAAG**GTGATTCATGGAAAAGTACAGAGATTTAGTGTGTGGATATGAGTGAG  
 AGAAACAGTGGATATGTGTGGCAGTTTTCTGACCTTGGTGTCTCTTTGTTTGC**AGGTGTCCAGTGTGAAGTGCAGATGGT**  
**GGAATCTGGGGGAACCTTGGTACACCCGGGGGGTCCCTGAGACTCTCCTGTACAGCCTCAGAAATTAATTTAATTCC**  
**TATACTATTAATTTGGGTCCGCTGCCTCCAGGGAAGGGCCTAGAGTGGATTGCAAATATAAGTAGTACTGGCAGTGACA**  
**TATATTATGTAGACTCTTTGAAGGGCCGGTTCACCATCTCCAGAGACAATGCCAAGAATTCGGTATATCTCCAATGAC**  
**TGGTCTGAAAGACGAGGACACGGCTGTCTACTATTGTGCGACGGGGGAACGGACTCCACCAGGGTCTTCTTTACTGG**  
**GGCTGGGAACCTGGTACCGTCTCCTCGG**GTGAGTCCGCACAACCTCAGTCCAACCTTAACTCTGAAAAATTTTTCT  
 GTCTTTTTGGCACGAATAAGTCTTCTGCATCCCCTCTTAAAGAGAGACCCGGAGCCGCCTGGGGCCCTTAAAAGAATGG  
 CCTGAGGCAACACCGACCAGACAGACGAAGGTCAAGGAATCCAGATGTTCTTCCGCCTGAGTCCATTAGGTGAGACT  
 TTCTGTGGCCAGGGCCACCCTGGGCTCTGGGGTCCAACGTCCAGCAACCCCGGGCCCTCCCCG

#### **SUDHL-6 L-HVR**

IGKV1-5, J1

CCTGCCTGCATGGACCAACACGGTATCATCTTTGTATATCTGTAGTAAATTTGGTTGATCTAATACTAGTAAGAATAAAG  
 GCACAACACCATTACTTAAAACCTTACAAATATATAGCATCATGGCGATACACTTTATTTTTTAAATTTTTTTTAGAAAGGA  
 ACAATGTTAAACTCACAGAGATGTTGCAGGTATACCACAATTACCCCTTCCCTACCCGGAATCTTATGAGAGTCTTTT  
 GAAGACTTGAGAATCCTACCATCTAACATTTTACTATGTGTTTCCCTACAAACAAGAATATTCTCCTAAATAATCTTGAT  
 ACACCAATGAAAAACATTACTCTATCGGCTCCTGAGGAATATTTAAAATTTCTAAAAAATACTAAAATTTGTTTCTC  
 TTAATAAAATAGTCCCCAGTAGAAACACATTTCTCTGCAGACAAAATTTGTGCTACCCTGGTCTTACCT**GGGACACCTGGG**  
**GACTGAGCTGGTGTGAGTTACTGAGATGAGCCAGCTCTGCAACTGTGCCAGCCTGCCCATCCCCTGCTCATTG**  
**CATGTTCCCAGAGCACAACTCCTGCCCTGAAGCCTTATTAATAGGCTGGTCACTTTGTGCAGGAGTCAAGCCAGT**  
**CAGGACACAGC**ATCGACATGAGGGTCCCCGCTCAGCTCCTGGGGCTCCTGCTGCTCTGGCTCCCAGGTAAAGGAAGGAGA  
 AACTAGGAATTTACTCAGCCCAGTGTACTCAGTACTGCCTGGTTATTCAGGGAAGTCTTCTATAACATGATCAAAG  
 TAACAAAATATGTGTCTCCATTTCCAATCTC**AGGTGCCAAATGTGACATCCAGATGACCCAGTCTCCTTCCACCCTGTC**  
**TGCATTTGTAGGAGACAGAATCACCATAACTTGGCGGGCCAGTCAGAGTATTTATAACTGGTTGGCCTGGTATCAACAA**

AAACCAGGGAGAGCCCCAAAAGTCCTCGTCTATAAGGCGTCTAATTTACAAGGCGGCGTCCCATCAAGGTTTACGCGGCA  
 GTGGATATGGGACAGAATTCAGTCTCACCATCAGCAGCCTGCAGCCTGAGGATTTTGAACATATTTACTGCCAACAGTA  
 TCAGAGTTATTCGTGGACTTTTCGGCCAAGGGACCAAGGTGGAGATGAAACGTGAGTAGAATTCGGACTTTGCCTCCTCA  
 ATTGTCTGTGTATTCGGTTCCCTGGGTCTGTGAAGTGATCTATAACGTGACTCGGCAATCGGCCTCTGATCTCCTTCAG  
 GCAAAGATAAAAAATAAGTCTGTTGTCAAACTCGAGACTGGGTGCACATCTTCTTTGAAGAGCAGGCAAGGCAACATT  
 CAGTCATTGGGTGAGAATACTTTGTCTAAGCATTGACTTCAGGAGTGTCTTGGGGAACATAACATGTTCTGGAGACAGT  
 CTCGGGCAATTGTCAAAGGGGAATTTTTCTTTAGGAGGGAAGTTAAGAGGAACCCTTGTGTAAACACTTATGACCAGG  
 GGACCAAGGTGGAGGTCAAAGGTAAGTACTTTTTTTCACTGATTCTTCATTGTTGGCAATTGTTTTACTCAGTATTCTT  
 TTGTGTGGATTTTTACTAGTCGGATGCCA

### TMD8 H-HVR

IGHV3-48, D1-26, J5

TTACTTCCACTTCTGTAAATGGAGAAAATATTGTCTCCTACAGAACATAGTTTACATGAATATTTAAAATGAAATAGGG  
 TGATTAGTGCAAAGTGTATATCACAGCACAAATTCATAATAAGACAGCATATTTCCAAATGCAATCATTGCCAGCAA  
 CTCTACAGGGCACCCTCGTCTTATCTGGGTACAGCCTACTCCTCAAGGGTCCCACCCTAGAGCTTGCTATATAGTAGG  
 AGATATGCAAATAGGGCCCTCCCTCTACTGATGAAAACCAACCCAACCCTGACCCTGCAGCTCTCAGAGAGGTGCCTTA  
 GCCCTGGATTCCAAGGCATTTCCACTTGGTGATCAGCACTGAACACAGAGGCCCTCACCATGGATTTGGGGCTGTGCTGG  
 GTTTTCCTTGTGCTATTTTAGAAGGTGATTCAATGTAACACTGGAGAGACTTAGTCTGTGTGGATAGGAGTGAGAAAA  
 GAGAGGATATGTGCGGCAGTTTGTGACCTTGGTGTCTTTTTCTTTACAGGTGGCCAGTGTAGAGTGCAACTGGTGGAGT  
 CTGGGGGAGACCTGGTACAGTCGGGGGGTCCCTGAGACTCTCCTGTGTAGCCTCTGGATTACCTTTAGTTCTTACAG  
 TATGAAGTGGGTCGGCCAGGCTCCAGGAAAGGGACTGGACTGGGTCTCATATATTAGTGGTACTAGTGGAACCATATAC  
 TACACAGACTCTGTGAAGGGCCGATTCATCATCTCCAGAGACAATGCGAAGAAGTTCGCTATATTTACAAATGAACAGCC  
 TGAGAGATGATGACACGGCTGTCTATTATTGTGTGAGAGATCGGGTGGGGGTAACCCATGGGGCCGCGGAACCCTGGT  
 CACCGTCTCCTCAGCTGAGTCTTCAACCTCTTTGTTGTTTTTCTCCGAGGCACTTTGTTCTTTTTTGGGGGAGA  
 TGAGGCTTCTGAGTCTCCCGCAAAGAGAACCCCGGAGCGCCCTGGGAGATTACGACGATGCCCTCTCAGACAGACGAG  
 GGGCAAGGACTCCTCATACTCTTTCATGTTGACCCCTCCAGTCTGGGTCTCTTTGTGGCCAGGGCCACCCTAGGCCTCT  
 GGGTCCAATGTCCAATAACCTCCGGGCCCGCCCCGGGGTCAGTTTGCAGTGTCTCGGGGCGTCGCGGGGCGCCAGT  
 GCTTGCCTGGGGTCTTGACATGATTGCCACAGTGTGACACCTAATTCGACCCCTGGGGCCAGGGGACCCTGGTCATCGT  
 CTCTCAGGTGAGTCTTACCACCCCTCTCTGAGTCCACTTGGGGAGACTCCACTTGCCTGGGTCTCAGGGTCAAAT  
 CTTGGAGACATTGTGGACCCACCAAACACAGGTGTGCAGAGGGACCCTTCGAACGGGAGCCAGCCTGTCTCCCCAA  
 CTCCGGCCACACATGTCGTCAGTTGGGGGGTCTTTCGGCTGGTCTGGGGTGACCTCTCTCCCCTTACCTGGAGCATT  
 GTCAGG

### TMD8 L-HVR

IGkV2-30, J1

ATGTGCCTGGGAGAGTACTATGAAACAAGAAATCTGTTAGGGAAGACAGAAGAAATACTTAAATTTCTCCAACATAGA  
 CAGCATAGATTTTATGCCTATTCGTTTCCCTCCAACAGAGAAGATATTTAAGTCATTTTGTCTACAAGAGAGGCTCCT  
 ACCCTCCCCTTGGCTCTTTCCACCCCACTGCACCCACCAGGTTATTTGCATATTATCCCTTAGTGAGGACTTTCTTGT  
 GAGTCTGAGATAAGAGCTCAGCTTACCCTTGCCTTGACTGATCAGGACTCCTCAGTTCACCTTCTCACATGAGGCTC  
 CCTGCTCAGCTCCTGGGGCTGCTAATGCTCTGGGTCCCAGTAAGGGTAGAAGGGAGATGAGGGAGGAGAATGGCATGG  
 AGCGGTGACTTCTGGGGCCCCACTGCCTCTAACAAACAGTCATCTCTGGGGGTCTCACTACACTCCTATGTGTGTTCTT  
 TTCTATATTGGACATGTACATGTTGTCTCCAAAACAAAGATCTGTGTGTGGGGAAGACTGATACTAAAACGGGATGA  
 TGTGGGGTCTTCTGGGGACCCCTTTGAGGCTTGGATCCCTTGGATTGCACTTTGAAACTGTGTTTTTTTGGAGACATGGA  
 TAGATATGTGTGTAGCCTGAAATAAAGAAGAGATCCAAGTTTATGAAAATTACAGATGAGCTTTATACATAGGCTTCTT  
 ATTCTTTCCAATTATTGTAGGATCCAGTGGGAATGTGGTGATGACTCAGTCTCCTCCTCCTCCGTACCCCTAGGA  
 CAGCCGGCCTCCATCTCCTGCATGTCTAGTCGAAGTCTCGTACACAGTGATGGAACACTTATTTGAATTGGTTTCATC  
 AGAGGCCAGGCCAATCTCCGAGGCGCTAATTTATAAAGTTTCTAACCGGGACTCTGGGGTCCCAGACAGATTGAGTGG  
 CAGTGGGTGAGGCACCGATTTACACTGAAGATCAGCAGGGTGGAGGCTGAGGATATTGGGGTTTATTATTGTATGCAA  
 GCTACACACTGGCCTCCGTGGACGTTTCGGCCAAGGGACCAAGGTGGAAATTCACAGTACAAATTAATGTGTCTT  
 CTGTTGCCTGTGTGATGAGGTGATCTCTAAGGTGACTCCACAATCAGTCTCTGATATCGTTTAGGGAAAACATAAAGA  
 TAGGTCTGTAGTCAAAGTCGGGAATTGATTGCACAGTGTCTTTGAAGAGTATAACAAGGGTCACTATTGAGTGAAAATA  
 TCTTTTCTAAATAATATGTTTGAATGTCTTGGGGAACAAAACATGTTCTAGACAGAGCCTTGGTCAATTGTCAGAAA  
 GGGAGTTTTTGTATAGGAGGGAAGTTAAGAGGAACCAATGTGTGCACACTTTTGGCCAGGGGACCAAGCTGGAGATCAA  
 ACGCAAGTACGTTTTTCCACTGATTCTTTATTATTGTTAATTCGTTTACTTTGTATTCTTTGTGCGGTTTTTTCATTAG  
 TCGAATGCCAGGGATCTAACAACTTCAATCCCATGTAAGGTACTGAGGAGGGGAATTTGTTCCACAGGAAGTTACCTT

GTGACTAATTTTTAAGAATTCTAAATCAAAACAACCTTCCTTGGGGGAAAGAGGCTTGCTGCAATTTTCAGGGACCTTTTT  
GTAAAGGGAAAAGTCAAGACGACTCACTGTGATTCACTTTTCGGCCCTGGGACCAAGGTAGATGTCAAACGT

### **U2932 H-HVR**

IGHV4-39, D3-22, J4

TGACTATTTAGATGGCCTGGGTGTGTGGTTGGTTTTATATGAATCTTTAAGGGTTGAACAGTACTGACCCTATTCCAAA  
ATCTGTCCTTGATCCAGGATCACACTCATCTCTCAGACCAGCTCCTTCAGCACATCTCTTTACCTGGAAGAAGAGGACT  
CTGGGCTTGAGAGGGGGAGGCCCAAGAAGAGAAGTGAATTTCTCAAAGGGCACAGCCAGCATTCTCCTCCCAGGGTGAG  
CTCAAAGACTGGCGCCTCTCTCATCCCTTTTCACTGCTCCGTACAAACGCACCACCCCATGCAAATCCTCACTTAGG  
CGCCACAGGAAGCCACCACACATTTCTTAAATTCAGGTCCAACCTATAAGGAAATGCTTCTGAGAGTCATGGATC  
**TCATGTGCAAGAAAATGAAGCACCTGTGGTTCTTCTCCTGCTGGTGGCGGCTCCCAGATGT**GAGTGTTTCTAGGATGC  
AGACATGGAGATATGGGAGACTGCCTCTGATCCCAGGGCTCACTGTGGGTTTTTCTGTTAC**AGGGTCTGTCC**CAGC  
**TGCAGCTGCAGGAGTCGGGCCAGGACTGGTGAAGCCTTCGGAGACCCTGTCCCTCACCTGCAC**TGTCTCTCGTGTCTC  
**CATCAGCAGTAGTAATTACTACTGGGGCTGGATCCGCCAGCCCCAGGGAAGGGGCTGGAATGGATTGGGAGTGACTAT**  
**TATGGTGGCAGTACCTCCTACAACCCGTCCCTCAAGGTCGAGTCATTATATCCGTAGACACGTCCAAGAACCATTCT**  
**CCCTGAAACTGACCTCTGTGACCGCCGACACAGGCTCTATATTACTGTGCGAGAGCGCTGTCTTACTATGATACTGG**  
**TGGTTTCAGGTACTTCTTTGACTACTGGGGCCAGGGAACCCCTGGTCACCGTCTCCTCAGGT**GAGTCCTCACGACCTCTC  
TCCTGCTTTAACTCTTAAGGATTTTGTCTGCATTTTTGGGGGGAAATAAGCGTGCTGGGTCTCCTGCCAAGAGAGCCCCG  
GGCTGGGTCTCCTGCCAAGAGAGCCCCGGAGCAGCCTGGGGCTCAGGAGGATGCCCTGAGGCAACAGCGGCCACACAGA  
CGAGGGGCAAAGGCTCCAGATGTTCCCTCCTCCTGAGCCCAGCAGCACGGGTCTCTCTGTGGCCAGGGCCACCCTGGGC  
CTCTGGGGTCCAATGTCCAACAACCCCCGGGCCCTCCCCGGGCTCAGTCTGAGAGGGTCCCAGAGACTTAACGGGGTGC  
CAGTTCCTTGCCCTGGGGTCTGGCATTGTTGTACAATGTGACACCTGGTTCGCCCCCTGGGGCCAGGGACCCCTGGTCA  
CCGTCTCCTCAGGTGAGTCTCACCGCCCCCTCTCTGAGTCCACTTAGGGAGACTCAGCTTGCCAGGGTCTCAGGGTCA  
GAGTCTTGAGGCATTTTGGAGGTGAGAAAGAAAGCTGGGGAGAGGGACCCCTTCAATGGGAACCCAGCCTGTCTCC  
CCAAGTCCGGCCACAGATGTCGGCAGCTGGGGGGCTCCTTCGGCTGGTCTGGGGTGACCTCTCTCCGCTTACCTGGAG  
CATTCTCAGGGCTGTCTGATGATTGCGTGGTGGGACTCTGTC

### **U2932 L-HVR**

IGKV3-20, J1

AGAATGAGACAGCTTCTGGACCCTCAGGAAAGATCACTAACAAGTAAATACAAGTATATCCGGAAGATAAAGTTGTAAT  
AGACTCTTCCCTTCAACCTGATCCATCATGCATTTAGGGAGCTGACTGGGCACAAGTTGGAGCAGAAAGAGAAAAATGA  
AACCACAGCCTTCTATTTTGTCTTCTAACAGACTTGTACCAACATTCTGTGGCTCAATCTAGGTGATGGTGAGACAAGA  
GGACACAGGGGTAAATTTCTGTGGCCGAGGGGAGAAGTTCTACCCTCAGACTGAGCCAACGGCCTTTTTCTGGCCTGAT  
CACCTGGGCATGGGCTGCTGAGAGCAGAAAGGGGAGGCAGATTGTCTCTGCAGCTGCAAGCCAGCACCCGCCCCAGCT  
GCTTTCATGTCCCTCCAGCCGCCCTGCAGTCCAG**AGCCATATCAATGCCCTGGGT**CAGAGCTCTGGAGAAGAGCTGC  
**TCAGTTAGGACCCAGAGGGAACCATGGAAACCCAGCGCAGCTTCTCTTCTCCTGCTACTCTGGCTCCCAGGT**GAGGG  
GAACATGGGATGGTTTTGCATGTCAGTGAAAACCCCTCTCAAGTCCTGTTACCTGGCAACTCTGCTCAGTCAATCAATA  
ATTAAAGCTCAATATAAAGCAATAATTCTGGCTCTTCTGGGGAGACAATGGGTTTGATTTAGATTACATGGGTGACTTT  
TCTGTTTTATTTCCAATCTC**AGATAACCACCGGA**GAATTGTGTTGACGCAGTCTCAGGCACCCGTCTTTGTCTCCAG  
**GGAAAGAGCCACCCCTCCTGCAGGGCCAGTCAGAGTGTAGCAGCAGCTACTTAACCTGGTACCAGCAGAAACCTGG**  
**CCAGGCTCCCAGGCTCCTCATCTATGGTGGTCCAACAGGGCCACTGGCATCCAGACAGGTT**CAGTGGCAGTGGGTCT  
**GGGACAGACTTCACTCTCACCATCAGCAGACTGGAGCCTGAAGATTTTGCAGTGTATTACTGTCAGCAGTATCGTAGCT**  
**CACCTCCGACGTGGACGTTCCGGCCAAGGGACCAAGGTGGAGATCAACGT**GAGTAGAATTTAAAGTTTGCTTCTCAGT  
TGTCTGTGCTTCTGCTCCCTGTGTCTATGAAGTGATCTATAAACTGACTCTGCAATCAGCCTCTGATATCCTTCAGGG  
AAAAGAAAAAGATAAGTCTGTAGTCAAACCTCGAGAATTGATTGCACATTTTTCTTTGAAGAGCAAGCAAGATTGATCAT  
TGGGTGAGAATAACTTGTCTAAGTAATAGCTTCAGAAATGTCCTGGGGAAACATAACATGTTCTGGACAGAGCCTTGGTC  
AATTGTCAGAAAGGGAGTTTTTGTATAGGAGGGAAGTTAAGAGGAACCATTGTGTGTACACTTTTGGCCAGGGGACCAA  
GCTGGAGATCAAACGTAAGTACTTTTTTCCACTGATTCTTCACTGTTGCTAATTAGTTTACTTTGTGTTCCCTTGTGTG  
GATTTTCATTAGTCGGATGCCAGGATCTAACAACTTCATTCCAGGTTAGGTACAGAGGAGGGGAAATTGTTCCACA  
GGAAGCTAGCTTGTGGCTAATTTTTAAGATTTCTAAATCAAAATAACTTCATTGGGGGAAAGAGGCTTGCTGAGCTTTC  
AGGGAGGTTTTTGTAAAGGGAAAAGTTAAGACGAATCACTGTGATCCTTTCGGCCCTGGGACCAAGTGGATATCAA  
ACGTAAGTACATCT



**Homology arms for H-HVR replacement with inserted GFP and F2A sequences**

Fragments of DNA as inserted in the into pSC-B-amp/kan plasmid (Agilent Technologies) and used for ligation mediated assembly of repair template plasmids for H-HVR and L-HVR replacement.

**The sequences are marked as follows:**

Introns: GTTATAT

Exons in bold: **CCTTAAA**

GFP: **ATGGTGA**

F2A: **GTGACAG**

Splice donor and acceptor sites: **GT AG**

Silent changes to prevent re-targeting of repair template plasmid and modified genomic locus: **A**CTG**C**

BsmBI restriction cassette: GGAGACGCCCTCGTCTCC

BsmBI restriction sites: GAGACG and CGTCTC

BbsI restriction sites: GAAGAC and GTCTTC

Cas9/sgRNA sites: underlined

**HBL-1\_H\_HA\_GFP\_F2A**

AACTGTATTCCAAAATCTGTCTTTGATCCATGATCACACTTGTCTCCCAGACCAGCTCCTTCAGCACATTTCTACCTG  
 GAAGAAGAGGACTCTGGGTTTGGTGAGGGGAGGCCACAGGAAGAGAAGTCTCAGAGGGCACAGCCAGCATAAC  
 CTCCCAGGGTGAGCCCAAAGACTGGGGCCTCCCTCATCCCTTTTTACCTATCCATACAAAGGCACCACCCACATGCAA  
 ATCCTCACTTAGGCACCCACAGGAAATGACTACACATTTCTTAAATTCAGGGTCCAGCTCACATGGGAAGTGCTTTCT  
 GAGAGTCT**CTGAAACTTCTGCACAAGAACATGGTGAGCAAGGGCGAGGAGCTGTTACCCGGGTGGTGCCCATCCTGGTC**  
**GAGCTGGACGGCGACGTAAACGGCCACAAGTTCAGCGTGTCCGGCGAGGGCGAGGGCGATGCCACCTACGGCAAGCTGA**  
**CCCTGAAGTTCATCTGCACCACCGGCAAGCTGCCCGTGCCTGGCCACCCTCGTGACCACCTTCACCTACGGCGTGCA**  
**GTGCTTCGCCCCTACCCCGACCACATGAAGCAGCAGACTTCTTCAAGTCCGCCATGCCCGAAGGCTACGTCCAGGAG**  
**CGCACCATCTTCTTCAAGGACGACGGCAACTACAAGACCCGCGCCGAGGTGAAGTTCGAGGGCGACACCCTGGTGAACC**  
**GCATCGAGCTGAAGGGCATCGACTTCAAGGAGGACGGCAACATCCTGGGGCACAAGCTGGAGTACAACATAACAGCCA**  
**CAAGGTCTATATCACCGCCGACAAGCAGAAGAAGCCATCAAGGTGAAGTTCAGACCCGCCACAACATCGAGGACGGC**  
**AGCGTGCAGCTCGCCGACCCTACCAGCAGAACACCCCATCGGCGACGGCCCCGTGCTGCTGCCCGACAACCCTACC**  
**TGAGCACCCAGTCCGCCCTGAGCAAAGACCCCAACGAGAAGCGCGATCACATGGTCTGCTGGAGTTCGTGACCGCCCGC**  
**CGGGATCACTCTCGGCATGGACGAGCTGTACAAGGTGACAGAGTTGCTGTACAGGATGAAGCGGGCCGAGACCTACTGT**  
 CCAAGGCCTCTGCTGGCAATTCACCCAACGGAGGCTCGGCATAAGCAAAGATTTGTGGCCCTGTCAAGCAGACTCTGA  
 ACTTCGATTTGCTCAAACCTGGCCGGCGATGTGGAGTCCAATCCGGGACCCGGAGACGCCCTCGTCTCCAGGTGAGTCTT  
**GAGAACGTCTCTCCTGGTTTAACTCTGACGGTTTTTATTGTATTATTGGGGGAAGTTCGGGTGTTGGGTCTCCTGCCA**  
 GGAGAACCCCGGAGCAGTCTGGGTGACTCAAGAGGATGCCCTGAGGCAACCGCACCACACAGACGAGGGGCAAGGGCT  
 CCAGATGTTCTTCTCCTGAGCCCAACAATACTAATCTCTCTGTGGCCAGGGCCACCCTAGGCCTCTGGGGTCCAATG  
 CCCGACAATCCCCGGGCCCTCCCCGACTCAGTCTGAGAGGGTCCAGGGACGTCACGGGGCGCCACTTCTTGCCAGGG  
 GTCTTGGCATTGTTGTACAATGTGACAACACTAGTT

**OCI-Ly7\_H\_HA\_GFP\_F2A**

GTCAGAGACAACAATGGTCCCAAAAAACCAGGTAATCTTTAGGCCAATAAAAATGTGGGTTCACAGTGAGGAGTGCA  
 TCCTGGGGTTGGGGTTTGTCTGCAGCGGGAAGAGCGCTGTGCACAGAAAGCTTAGAAATGGGGCAAGAGATGCTTTTC  
 CTCAGGCAGGATTTAGGGCTTGGTCTCTCAGCATCCACACTTGTACAGCTGATGTGGCATCTGTGTTTTCTTCTCAT  
 CGTAGATCAGGCTTTGAGCTGTGAAATACCCTGCCTCATGCATATGCAAATAACCTGAGGTCTTCTGAGATAAATATAG  
 ATATATTGGTGCCCTGAG**AGCATCACATAACAACCACATTCTACCTAAAGAAGCCCCTGGGAGCAAGGTGCATCACC**  
**ATGGTGAGCAAGGGCGAGGAGCTGTTACCCGGGTGGTGCCCATCCTGGTTCGAGCTGGACGGCGACGTAAACGGCCACA**  
**AGTTCAGCGTGTCCGGCGAGGGCGAGGGCGATGCCACCTACGGCAAGCTGACCCTGAAGTTCATCTGCACCACCGGCAA**  
**GCTGCCCGTGCCTGGCCACCCTCGTGACCACCTTCACCTACGGCGTGCAGTGCTTCGCCCCTACCCCGACCACATG**  
**AAGCAGCAGACTTCTTCAAGTCCGCCATGCCCGAAGGCTACGTCCAGGAGCGCACCATCTTCTTCAAGGACGACGGCA**  
**ACTACAAGACCCGCGCCGAGGTGAAGTTCGAGGGCGACACCCTGGTGAACCGCATCGAGCTGAAGGGCATCGACTTCAA**  
**GGAGGACGGCAACATCCTGGGGCACAAGCTGGAGTACAACATAACAGCCACAAGGTCTATATCACCGCCGACAAGCAG**  
**AAGAACGGCATCAAGGTGAAGTTCAGACCCGCCACAACATCGAGGACGGCAGCGTGCAGCTCGCCGACCCTACCAGC**  
**AGAACACCCCATCGGCGACGGCCCCGTGCTGCTGCCCGACAACCCTACCTGAGCACCCAGTCCGCCCTGAGCAAAGA**

CCCCAACGAGAAGCGCGATCACATGGTCCTGCTGGAGTTTCGTGACCGCCGCGGGATCACTCTCGGCATGGACGAGCTG  
 TACAAGGTGACAGAGTTGCTGTACAGGATGAAGCGGGCCGAGACCTACTGTCCAAGGCCTCTGCTGGCAATTCACCCAA  
 CGGAGGCTCGGCATAAGCAAAAAGATTGTGGCCCTGTCAAGCAGACTCTGAACTTCGATTTGCTCAAACCTGGCCGGCGA  
 TGTGGAGTCCAATCCGGGACCCGGAGACGCCCTCGTCTCCAGGTGAGTCCTCATAATCTATCATACTGCAGTATTTTGC  
 TGCCTTTTTGGGGGAAATAAGGGTCTGCTGGTCTCCTGCCAAGAAAGACCCGGAGCAGCCGGGGGGGGCTCAGGAGGAT  
 GCCCTGGGGCAACAGCGGACACGCAGACGAGGGTCAAGGGCTCCAGAAGCCCTTCTCCTGAGGCCGACAGCGCGGGT  
 CTCTCTGTGGCCAGGGCCACCTAGGCCTCTGGGGTCCAATGCCAACAAACCCCGGGCCCTCCCCGGGTTCACTCTGA  
 GAGGTCCCAGGGACGTGGCGGGGCGCCAGTTCTTGCTGGGTCTTGACATTGTTGTCACAATGTGACAACCTGGTTCC  
 ACCCTGGGGCCAGGGAACCTGG

#### OCI-Ly19\_H\_HA\_GFP\_F2A

TTAGTGCAAAGTGTTTATCACAGCACAATTTATAATAAGACAGCATATTTTCCAAACGCAATCATTGCCAGCAAACCTT  
 CCACAGGGCACCCTCGTCTTATCTGGGTACAGCCTACTCCTCAAGGGTCCCACCCTAGAGCTTGGTTTATAGTAGGAGA  
 TTTGCAAGTAGGGCCCTCCCTCTACTGATGAAAGCCAACCCAACCTGACCCTGCAGCTCTCAGAGAGGTGCCTTAGCC  
 CTGGATTCCAAGGCATTTCCACTTGGTGATCAGCACTGAACACAGAGGACTCACCATGGGTGAGCAAGGGCGAGGAGCTG  
 TTCACCGGGGTGGTGCCCATCCTGGTTCGAGCTGGACGGCGACGTAAACGGCCACAAGTTCAGCGTGTCCGGCGAGGGCG  
 AGGGCGATGCCACCTACGGCAAGCTGACCCTGAAGTTCATCTGCACCACCGGCAAGCTGCCCGTGCCTGGCCACCCT  
 CGTGACCACCTTACCTACGGCGTGCAGTGCTTCGCCCGCTACCCCGACCACATGAAGCAGCAGACTTCTTCAAGTCC  
 GCCATGCCCCAAGGCTACGTCCAGGAGCGCACCATCTTCTTCAAGGACGACGGCAACTACAAGACCCGCGCCGAGGTGA  
 AGTTCGAGGGCGACACCCTGGTGAACCGCATCGAGCTGAAGGGCATCGACTTCAAGGAGGACGGCAACATCCTGGGGCA  
 CAAGCTGGAGTACAACACAACAGCCACAAGGTCTATATCACCGCCGACAAGCAGAAGAACGGCATCAAGGTGAACCTC  
 AAGACCCGCCACAACATCGAGGACGGCAGCGTGCAGCTCGCCGACCCTACCAGCAGAACACCCCATCGGCGACGGCC  
 CCGTGCTGCTGCCGACAACCACTACCTGAGCACCCAGTCCGCCCTGAGCAAAGACCCCAACGAGAAGCGCGATCACAT  
 GGTCCTGCTGGAGTTCGTGACCGCCGCGGGATCACTCTCGGCATGGACGAGCTGTACAAGGTGACAGAGTTGCTGTAC  
 AGGATGAAGCGGGCCGAGACCTACTGTCCAAGGCCTCTGCTGGCAATTCACCCAACGGAGGCTCGGCATAAGCAAAAAGA  
 TTGTGGCCCTGTCAAGCAGACTCTGAACTTCGATTTGCTCAAACCTGGCCGGCGATGTGGAGTCCAATCCGGGACCCGG  
 AGACGCCCTCGTCTCCAGGTGAGTCCTGACAAAGTCTCATTACTTTAAGTCTGAAGCCTTTTCTGTATTTTGGGGG  
 GAAATACGGGTGCTGGGTCTCCTGCCTAGAGAGCCCCGGATCAGCCTGGGAGGCTCAGGAGGACGCCCTGAGGCAACAC  
 CGACCACACGGACGAGGGGCAAGGGCTCCAGATGTTCTTCTCGTGAGCCAGTAGTGCGGGTTTCTCTGTGGCCAGG  
 GCCACCCTAGGCCTCTGGGGTCCAATGTCTAACAAACACCCGGGCATATCAAGCTTATCGATACCGTGCACCTCGAGGGG  
 GGGCCCGGTACCCAGCTTTTGTTC

#### SUDHL-4\_H\_HA\_GFP\_F2A

GGGACAATTTATATGACAAGTTATATGAATCTTCAAGGGTAGAACAATATTGACCATATTCCAAAATCTGTCTTTGATC  
 CATGATCACACTCATCTCCAGACCAGGTCTTTCAGCACGTCTATTTACCTGAAAGAAGAGGACTCTGGGCTTGGAGAG  
 GGGAGACCCCAAGAAGACAACCTGAGTCTCAAGGGCACAGCCAGCATCCTACTCCAGGGCGAGCCAAAAGACTGGG  
 GCCTCCCTCCTCTTTTTACCTCTCCAGACAAAGGCACCACCACATGCAAAATCTTGCTTAAGCACCCACAGGAAAC  
 CACCACATTTCTTAAATTCAGGGTCCAGCTCACATGGGAAATACTTTCTGAGAGTCTTGACCTCCTGTGCAAGAA  
 CATGGGTGAGCAAGGGCGAGGAGCTGTTACCGGGGTGGTGCCATCCTGGTTCGAGCTGGACGGCGACGTAAACGGCCAC  
 AAGTTCAGCGTGTCCGGCGAGGGCGAGGGCGATGCCACCTACGGCAAGCTGACCCTGAAGTTCATCTGCACCACCGGCA  
 AGCTGCCCGTGCCTGGCCACCCTCGTGACCACCTTACCTACGGCGTGCAGTGCTTCGCCCGCTACCCCGACCACAT  
 GAAGCAGCAGACTTCTTCAAGTCCGCCATGCCCGAAGGCTACGTCCAGGAGCGCACCATCTTCTTCAAGGACGACGGC  
 AACTACAAGACCCGCGCCGAGGTGAAGTTCGAGGGCGACACCCTGGTGAACCGCATCGAGCTGAAGGGCATCGACTTCA  
 AGGAGGACGGCAACATCCTGGGGCACAAGCTGGAGTACAACACAACAGCCACAAGGTCTATATCACCGCCGACAAGCA  
 GAAGAACGGCATCAAGGTGAACCTCAAGACCCGCCACAACATCGAGGACGGCAGCGTGCAGCTCGCCGACCCTACCAG  
 CAGAACACCCCATCGGCGACGGCCCGTGTGCTGCTGCCGACAACCACTACCTGAGCACCCAGTCCGCCCTGAGCAAAG  
 ACCCAACGAGAAGCGCGATCACATGGTCTGCTGGAGTTCGTGACCGCCGCGGGATCACTCTCGGCATGGACGAGCT  
 GTACAAGGTGACAGAGTTGCTGTACAGGATGAAGCGGGCCGAGACCTACTGTCCAAGGCCTCTGCTGGCAATTCACCCA  
 ACGGAGGCTCGGCATAAGCAAAAAGATTGTGGCCCTGTCAAGCAGACTCTGAACTTCGATTTGCTCAAACCTGGCCGGCG  
 ATGTGGAGTCCAATCCGGGACCCGGAGACGCCCTCGTCTCCAGGTGAGTCCTCACAACCTATTCTCACCTAGTATTTT  
 GTCGCTTTTTTGGGGAAACATCAGTGTGCGGCTTCTCCTCCCAAGAGAGCCCCGGAGGAGCCTGGGGGACCCAGGAAAA  
 TGTCCTGAGACAACAGCGCCACACAGTGCAGAGACAAGGGCTCCAGATGTTCCCCCTAATATCAGTGTGTCTGTGCC  
 CAGGGTACCCCTGGGCTCTCCGGTCCAATGTCCGACAACCCCGGGCCCTCTCCGGCCTCAGTCTGAGAGGCTCCCAG  
 GGACTTAGGGGGGTGACATTTTTGCCTGGGGTCTTGGCATTCTTGTACAGATGTGACACCTGGTTCGACCCCGGGGCC  
 AGGGAGTCTGGTACGGTGGAGTCTCACCACCCCTGTCTGACTCCACC

**SUDHL-6\_H\_HA\_GFP\_F2A**

GGGTTTACTTCCACTTCTGTAAATGGAGAAAATATTGTCTCTACAGAACATAGTTTACATGAATATTTAAAATGAAAT  
 AGGGTGATTAGTGCAAAGTGTTTATCACAGCACAATTTTATAATAAGACAGCATATTTTCCAAATGCAATCATTGCCAG  
 CAACTTCTACAGGGCACCGTCGTCTTATCTGGGTACAGCCTACTCCTCAAGGGTCCCACCCTAGAGCTTGCTATATAG  
 TAGGAGATATGCAAATAGGGCCCTCCCTCTACTGATGAAAACCAACCCAACCTGACCCTGC**AGCTCTCAGAGAGGTGC**  
**CTTAGACCAGATTCCAAGGCATTTCCACTTGGTGATCAGCACTGAACACAGAGGACTCACC**ATGGTGAGCAAGGGCGA  
 GGAGCTGTTACCGGGGTGGTGCCCATCCTGGTCGAGCTGGACGGCGACGTAAACGGCCACAAGTTCAGCGTGTCCGGC  
 GAGGGCGAGGGCGATGCCACCTACGGCAAGCTGACCCTGAAGTTCATCTGCACCACCGGCAAGCTGCCCGTGCCCTGGC  
 CCACCCTCGTGACCACCTTACCTACGGCGTGCAGTGCTTCGCCCGCTACCCCGACCACATGAAGCAGCAGACTTCTT  
 CAAGTCCGCCATGCCGAAGGCTACGTCCAGGAGCGACCATCTTCTTCAAGGACGACGGCAACTACAAGACCCGCGCC  
 GAGGTGAAGTTCGAGGGCGACACCCTGGTGAACCGCATCGAGCTGAAGGGCATCGACTTCAAGGAGGACGGCAACATCC  
 TGGGGCACAAGCTGGAGTACAAC TACAACAGCCACAAGGTCTATATCACCGCCGACAAGCAGAAGAACGGCATCAAGGT  
 GAACTTCAAGACCCGCCACAACATCGAGGACGGCAGCGTGCAGCTCGCCGACCACTACCAGCAGAACACCCCCATCGGC  
 GACGGCCCCGTGCTGCTGCCCGACAACCACTACCTGAGCACCCAGTCCGCCCTGAGCAAAGACCCCAACGAGAAGCGCG  
**ATCACATGGTCTGCTGGAGTTCGTGACCGCCGCGGGATCACTCTCGGCATGGACGAGCTGTACAAG**GTGACAGAGTT  
 GCTGTACAGGATGAAGCGGGCCGAGACCTACTGTCCAAGGCCTCTGCTGGCAATTCACCCAACGGAGGCTCGGCATAAG  
 CAAAAGATTGTGGCCCCTGTCAAGCAGACTCTGAACTTCGATTTGCTCAAACCTGGCCGGCGATGTGGAGTCCAATCCGG  
 GACCCGGAGACGCCCTCGTCTCC**AGGT**GAGTCCGCACAA**CTGA**ATCCAACCTTAACTCTGAAAAATTTTTCTGTCTTT  
 TTGGCACGAAATAAGTCTTCTGCATCCCCTCTTAAGAGAGACCCGGAGCCGCTGGGGGCTTAAAGAATGGCCTGAG  
 GCAACACCGACCAGACAGACGAAGGTCAAGGAATCCAGATGTTCTTCCGCTGAGTCCATTAGGTTCGAGACTTTCTGT  
 GCCAGGGCCACCCTGGGCCTCTGGGGTCCAACGTCCAGCAACCCCCGGGCCCTCCCC

**U2932\_H\_HA\_GFP\_F2A**

GGGTTGAACAGTACTGACCCTATTCCAAAATCTGTCTTGGATCCAGGATCACACTCATCTCTCAGACCAGCTCCTTCAG  
 CACATCTCTTTACCTGGAAGAAGAGGACTCTGGGCTTGAGAGGGGAGGCCCAAGAAGAGAAGTGAAGTCTCAAAGGG  
 CACAGCCAGCATTTCTCCTCCAGGGTGAGCTCAAAGACTGGCGCCTCTCTCATCCCTTTTCACTGCTCCGTACAAACG  
 CACCACCCCATGCAAATCCTCACTTAGGCGCCACAGGAAGCCACCACAC**ATTTCTTAAATTCAGGTCCAACTCATA**  
**AGGGAAATGCTTTCTGAGAGCATGATCTCATGTGCAAGAAA**ATGGTGAGCAAGGGCGAGGAGCTGTTACCGGGGTG  
 GTGCCATCCTGGTCGAGCTGGACGGCGACGTAAACGGCCACAAGTTCAGCGTGTCCGGCGAGGGCGAGGGCGATGCCA  
 CCTACGGCAAGCTGACCCTGAAGTTCATCTGCACCACCGGCAAGCTGCCCGTGCCCTGGCCCACCCTCGTGACCACCTT  
 CACCTACGGCGTGCAGTGCTTCGCCCGCTACCCCGACCACATGAAGCAGCAGACTTCTTCAAGTCCGCCATGCCCGAA  
 GGCTACGTCCAGGAGCGCACCATCTTCTTCAAGGACGACGGCAACTACAAGACCCGCGCCGAGGTGAAGTTCGAGGGCG  
 ACACCCTGGTGAACCGCATCGAGCTGAAGGGCATCGACTTCAAGGAGGACGGCAACATCCTGGGGCACAAGCTGGAGTA  
 CAACTACAACAGCCACAAGGTCTATATCACCGCCGACAAGCAGAAGAACGGCATCAAGGTGAAC TCAAGACCCGCCAC  
 AACATCGAGGACGGCAGCGTGCAGCTCGCCGACCACTACCAGCAGAACACCCCCATCGGCGACGGCCCCGTGCTGCTGC  
 CCGACAACCACTACCTGAGCACCCAGTCCGCCCTGAGCAAAGACCCCAACGAGAAGCGCGATCACATGGTCTGCTGGA  
**GTTCGTGACCGCCGCGGGATCACTCTCGGCATGGACGAGCTGTACAAG**GTGACAGAGTTGCTGTACAGGATGAAGCGG  
 GCCGAGACCTACTGTCCAAGGCCTCTGCTGGCAATTCACCCAACGGAGGCTCGGCATAAGCAAAGATTGTGGCCCCTG  
 TCAAGCAGACTCTGAACCTCGATTTGCTCAAACCTGGCCGGCGATGTGGAGTCCAATCCGGGACCCGGAGACGCCCTCGT  
 CTGGGTCTCCTGCCAAGAGAGCCTCGGGCTGGGTCTCCTGCCATGAGAGCCCCGGAGCAGCTGGGGCTCAGGAGGATG  
 CCCTGAGGCAACAGCGGCCACACAGACGAGGGGCAAAGGCTCCAGATGTTCTTCTCCTGAGCCCAGCAGCAGGGTCT  
 TCTCTGTGGCCAGGGCCACCCTGGGCCTCTGGGGTCCAATGTCCAACAACCCCCGGGCCCTCCCCGGGCTCAGTCTGAG  
 AGGGTCCCAGAGACTTAACGGGGTGCCAGTTCTTGCTGGGGTCTCTC

**Homology arms for L-HVR replacement with inserted mTurquoise2 and F2A**

Fragments of DNA as inserted in the into pSC-B-amp/kan plasmid (Agilent Technologies) and used for ligation mediated assembly of repair template plasmids for H-HVR and L-HVR replacement.

**The sequences are marked as follows:**

Introns: GTTATAT  
 Exons in bold: **CCTTAAA**  
 mTurquoise2: **ATGGTGA**  
 F2A: **GTGACAG**  
 Splice donor and acceptor sites: **GT AG**  
 Silent changes to prevent re-targeting of repair template plasmid and modified genomic locus: **A**CTG**C**  
 BsmBI restriction cassette: GGAGACGCCCTCGTCTCC  
 BsmBI restriction sites: GAGACG and CGTCTC  
 BbsI restriction sites: GAAGAC and GTCTTC  
 Cas9/sgRNA sites: underlined

**HBL-1\_L\_HA\_mTurquoise2\_F2A**

CCATCATGCATTTAGGGAGCTGACTGGGCACAAGTTGGAGCAGAAAGAGAAAAATGAAACCACAGCCTTCTATTTTGT  
 TCTAACAGACTTGTACCAACATTCTGTGGCTCAATCTAGGTGATGGTGAGACAAGAGGACACAGGGGTTAAATTCTGT  
 GGCCGCAGGGGAGAAGTTCTACCCCTCAGACTGAGCCAACGGCCTTTTCTGGCCTGATCACCTGGGCATGGGCTGCTGAG  
 AGCAGAAAGGGGAGGCAGATTGTCTCTGCAGCTGCAAGCCAGCACCCGCCCCAGCTGCTTTGCATGTCCCTCCAGCC  
 GCCCTGCAGTCCAGAGCCCATATCAATG**CCTGGGT**CAGAGCT**C**GGAGAAGAGCTGCTC**GGT****AGT****ACCCAGAGGGAAC**  
**C**ATGGTGAGCAAGGGCGAGGAGCTGTTACCGGGGTGGTGCCCATCCTGGTCGAGCTGGACGGCGACGTAAACGGCCAC  
AAGTTCAGCGTGTCCGGCGAGGGCGAGGGCGATGCCACCTACGGCAAGCTGACCCTGAAGTTCATCTGCACCACCGGCA  
AGCTGCCCCTGCCCTGGCCCACCTCGTGACCACCTGTCTGGGGCGTGCAGTGCTTCGCCCGCTACCCCGACCACAT  
GAAGCAGCAGACTTCTTCAAGTCCGCCATGCCGAAGGCTACGTCCAGGAGCGCACCATCTTCTTCAAGGACGACGGC  
AACTACAAGACCCGCGCCGAGGTGAAGTTCGAGGGCGACACCCTGGTGAACCGCATCGAGCTGAAGGGCATCGACTTCA  
AGGAGGACGGCAACATCCTGGGGCACAAGCTGGAGTACAATACTTTAGCGACAACGTCTATATCACCGCCGACAAGCA  
GAAGAACGGCATCAAGGCCAACTTCAAGATCCGCCACAACATCGAGGACGGCGGCGTGCAGCTCGCCGACCACTACCAG  
CAGAACACCCCATCGGGCAGCGCCCGTGTCTGCTGCCGACAACCACTACCTGAGCACCCAGTCCAAGCTGAGCAAAG  
ACCCCAACGAGAAGCGCGATCACATGGTCTCTGCTGGAGTTCGTGACCGCCGCCGGGATCACTCTCGGCATGGACGAGCT  
GTACAAGGTGACAGAGTTGCTGTACAGGATGAAGCGGGCCGAGACCTACTGTCCAAGGCCTCTGCTGGCAATTACCCA  
ACGGAGGCTCGGCATAAGCAAAAGATTGTGGCCCTGTCAAGCAGACTCTGAACTTCGATTTGCTCAAACCTGGCCGGCG  
ATGTGGAGTCCAATCCGGGACCCGGAGACGCCCTCGTCTCC**ACGT**AAGTACATCTGTCTCAATTATTCGTGAGATTTTA  
GTG**CA**CTG**A**ATCATTTGTGCAAATTTGTGATATTTTGGTTGAATAAACCTGGTGACCCAGAAGTAAATAGCAGGACA  
CCAGAAAATGAACTTAAAAATCTGAGCAAATAGACGAATCATTTGGTTTGGAGGAGAATAGGATTCATGGGGAAATG  
GGGAAGAAATAGCTAGATTTTCTCTGAACAAGCAGCCTATCTCGTATGATTGGCTTCAAGAGAAGTTTTTGTGAGGG  
GAAAGGTGAGATCCCTCACTGTGACTCACTTTCGGCGGAGGGACCAAGGTGGAGATCAAACATAAGTGCATTTTCTTA  
ATGCTTTTTCTTATAAGGTTTTAAATTTGGAGCATTTTTTGTGTTTGGAGATATTAGCTCAGG

**OCI-Ly7\_L\_HA\_mTurquoise2\_F2A**

GTATATTACTGATTAATATAGGTAAGAGGCGAGTTAAGAAATTGGGAATGCTTTCTCTTCTGCTTTCTTCTACGATGCAC  
 AAGGCGTTTTACATTTATGCCCTATGAAAATTACTAGGCTGTCTAGTCATTAGATCTTTCAGCAGTTTGTAGTTTTTA  
 GAGCTTCTAAGTTGACTTCTGTCTTTTCTATTTCATACAATTACACATTCTGTGATGATATTT**TTGGCTCTTGATTTACA**  
**TTGGGTACTTTTACAACC****CACTGCTCATGAAATTTGCTTTTGTACTCACTGGTTGTTTTTGCATAGGCCCTCCAGGCC**  
**ACGACCAGCTGTTTGGATTTTATAAACGGCCGTTTGCATTGTGA****ACTGAGCTACAACAGGC****GG****AGT****GGCAGCAAGA**  
**TGGTGAGCAAGGGCGAGGAGCTGTTACCGGGGTGGTGCCCATCCTGGTCGAGCTGGACGGCGACGTAAACGGCCACAA**  
**GTTTCAGCGTGTCCGGCGAGGGCGAGGGCGATGCCACCTACGGCAAGCTGACCCTGAAGTTCATCTGCACCACCGGCAAG**  
**CTGCCCGTGCCCTGGCCCACCTCGTGACCACCTGTCTGGGGCGTGCAGTGCTTCGCCCGCTACCCCGACCACATGA**  
**AGCAGCAGACTTCTTCAAGTCCGCCATGCCGAAGGCTACGTCCAGGAGCGCACCATCTTCTTCAAGGACGACGGCAA**  
**CTACAAGACCCGCGCCGAGGTGAAGTTCGAGGGCGACACCCTGGTGAACCGCATCGAGCTGAAGGGCATCGACTTCAAG**  
**GAGGACGGCAACATCCTGGGGCACAAGCTGGAGTACAATACTTTAGCGACAACGTCTATATCACCGCCGACAAGCAGA**

AGAACGGCATCAAGGCCAACTTCAAGATCCGCCACAACATCGAGGACGGCGGCGTGCAGCTCGCCGACCACTACCAGCA  
 GAACACCCCATCGGCGACGGCCCCGTGCTGCTGCCCGACAACCACTACCTGAGCACCAGTCCAAGCTGAGCAAAGAC  
 CCCAACGAGAAGCGCGATCACATGGTCCTGCTGGAGTTCGTGACCGCCGCCGGGATCACTCTCGGCATGGACGAGCTGT  
 ACAAGGTGACAGAGTTGCTGTACAGGATGAAGCGGGCCGAGACCTACTGTCCAAGGCCTCTGCTGGCAATTCACCCAAC  
 GGAGGCTCGGCATAAGCAAAAGATTGTGGCCCTGTCAAGCAGACTCTGAACTTCGATTTGCTCAAACCTGGCCGGCGAT  
 GTGGAGTCCAATCCGGGACCCGGAGACGCCCTCGTCTCCACGTGAGTAGAATTTAAACTTTGCTTACTTAGCTGTCTGT  
 GTCTTCTGTTCTCTAGCTATGAAGTGATCTATAAGTCGACTCTGCAATCAGCCTCTGATATCCTTCAGGGAAAAGAT  
 AAAGATAAGTCTGTAGTCAAACCTCGAGAATTGATTGCACATTTTCTTTGAAGAGCAAGCAAGATTTCAGTCATTGGGTGA  
 GAATAACTTGTCTAAGGAATAGCTTCAGAAATGTCCTGGGGAACAAAACATGTTCTGGACAGAGCCTTGGTCAATTGTC  
 AGAAAGGGAGTTTTTGTCTAGGAGGGAACCTAAGAGGAACCATCGTGTGTACACTTTTGGCCAGGGGACCAAGCTGGAG  
 ATCAAACGTTAGTACTTTTTTCTACTGATTCTTCACTGTTCC

#### OCI-Ly19\_L\_HA\_mTruquoise2\_F2A

CCCACCCTCTAAGACTTCATTAGACATTCCCTACGAATGGTTATACTCTCCTGTATACTCCCAATACAACCTCTAAAATA  
 TATTATTCCATATAGTCTTAGGTTTGTATTAAAGTTTGACTTTTTTCCTTCAAATATCTCTTGTACACAACAGCGGCT  
 CTAGAGAGAAAATACATTCCCTCCAGGCAAATCTATGCTGCGCTGGTCTGACCTGGGACCCTGGGGACATTGCCCTGTG  
 CTGAGTTACTAAGATGAGCCAGCCCTGCAGCTGTGCTCAGCCTGCCCATGCCCTGCTGATTGATTGTCATGTTCCAGA  
 GCACAGCCTCCTGCCCTGAAGACTTTTTTATGGGCTGGTGCACCCTGTGCAGGAGTCAGTCTCAGTCAGGACACAGCA  
 TGGTGAGCAAGGGCGAGGAGCTGTTACCCGGGTGGTGCCCATCCTGGTTCGAGCTGGACGGCGACGTAAACGGCCACAA  
 GTTCAGCGTGTCCGGCGAGGGCGAGGGCGATGCCACCTACGGCAAGCTGACCCTGAAGTTTCATCTGCACCACCGGCAAG  
 CTGCCCGTGCCTGGCCACCCTCGTGACCACCCTGTCTGGGGCGTGCAGTGCTTCGCCCGCTACCCCGACCACATGA  
 AGCAGCAGACTTCTTCAAGTCGCCATGCCCGAAGGCTACGTCCAGGAGCGCACCATCTTCTTCAAGGACGACGGCAA  
 CTACAAGACCCGCGCCGAGGTGAAGTTCGAGGGCGACACCCTGGTGAACCGCATCGAGCTGAAGGGCATCGACTTCAAG  
 GAGGACGGCAACATCCTGGGGCACAAGCTGGAGTACAATACTTTAGCGACAACGTCTATATCACCGCCGACAAGCAGA  
 AGAACGGCATCAAGGCCAACTTCAAGATCCGCCACAACATCGAGGACGGCGGCGTGCAGCTCGCCGACCACTACCAGCA  
 GAACACCCCATCGGCGACGGCCCCGTGCTGCTGCCCGACAACCACTACCTGAGCACCAGTCCAAGCTGAGCAAAGAC  
 CCCAACGAGAAGCGCGATCACATGGTCCTGCTGGAGTTCGTGACCGCCGCCGGGATCACTCTCGGCATGGACGAGCTGT  
 ACAAGGTGACAGAGTTGCTGTACAGGATGAAGCGGGCCGAGACCTACTGTCCAAGGCCTCTGCTGGCAATTCACCCAAC  
 GGAGGCTCGGCATAAGCAAAAGATTGTGGCCCTGTCAAGCAGACTCTGAACTTCGATTTGCTCAAACCTGGCCGGCGAT  
 GTGGAGTCCAATCCGGGACCCGGAGACGCCCTCGTCTCCACGTGAGTGGGATTTACACTTTGTTTCTTCACTTGTCTGT  
 GTCTTTTGTTCCTGCTGATGAAGTGATATATAAGGTTAGTCTAGAAGCAGTCTGTGACATCCTTCAGGGAAAAGG  
 TTGATAAGTCTGGAATCAAACCTCGAAAATTGATTACACATTTTTTTTTGAGGAATAATCAACCTTCAGGCATTGGGTGAG  
 AATAAGTCGTCTACGTAATAATTTAGAGATGTCGTGGGGAACATAACATGTTCTGGACAGAACCCTGGTCAATTGTCAC  
 AAAGGGAATTTTTGCATAGGAGGCAAAGTAAGTGAACCAACGTGTATAACTTTTTGGCCAGGGGACCAAG

#### SUDHL-4\_L\_HA\_mTruquoise2\_F2A

GGCTGTCTGCTCATCAGTGCTTGTAGGAAAGGGTAACGTTTCTTTTTTAGATTAGCTGGGAGGGAGCCAAGAAGAATG  
 GCATTCATCCATATTCATTCTAGACATATCTCTACATTGTTAGGGTTGTTATGCTTTCCTAGAGTTGCATATCCTATAC  
 AATGGGACCTACCCAAGATCCAACTGTCACAGTCAGATCCTTCCCTCCATTTTATATCACATTGCTCACAGGAGAGAC  
 ATATCCCCTGCCCGCTGCCCATTTGACTCTTCCACACCACTGCATGCACCAGGGGATTTGCATATTGTCCCACAGGG  
 AGGACCTTCCCTTGTGAGTCTGAGATAAAAGCTCAGCTGTAACCTGTGCCTTGACTGATCAGGACTCCTCAGTTCACCTT  
 CTCACAATGGTGAGCAAGGGCGAGGAGCTGTTACCCGGGTGGTGCCCATCCTGGTTCGAGCTGGACGGCGACGTAAACG  
 GCCACAAGTTTACGCTGTCCGGCGAGGGCGAGGGCGATGCCACCTACGGCAAGCTGACCCTGAAGTTTCATCTGCACCAC  
 CGGCAAGCTGCCCGTGCCTGGCCACCCTCGTGACCACCCTGTCTGGGGCGTGCAGTGCTTCGCCCGCTACCCCGAC  
 CACATGAAGCAGCAGACTTCTTCAAGTCCGCCATGCCCGAAGGCTACGTCCAGGAGCGCACCATCTTCTTCAAGGACG  
 ACGGCAACTACAAGACCCGCGCCGAGGTGAAGTTCGAGGGCGACACCCTGGTGAACCGCATCGAGCTGAAGGGCATCGA  
 CTTCAAGGAGGACGGCAACATCCTGGGGCACAAGCTGGAGTACAATACTTTAGCGACAACGTCTATATCACCGCCGAC  
 AAGCAGAAGAACGGCATCAAGGCCAACTTCAAGATCCGCCACAACATCGAGGACGGCGGCGTGCAGCTCGCCGACCACT  
 ACCAGCAGAACACCCCATCGGCGACGGCCCCGTGCTGCTGCCCGACAACCACTACCTGAGCACCAGTCCAAGCTGAG  
 CAAAGACCCCAACGAGAAGCGCGATCACATGGTCCTGCTGGAGTTCGTGACCGCCGCCGGGATCACTCTCGGCATGGAC  
 GAGCTGTACAAGGTGACAGAGTTGCTGTACAGGATGAAGCGGGCCGAGACCTACTGTCCAAGGCCTCTGCTGGCAATTC  
 ACCCAACGGAGGCTCGGCATAAGCAAAAGATTGTGGCCCTGTCAAGCAGACTCTGAACTTCGATTTGCTCAAACCTGGC  
 CGGCGATGTGGAGTCCAATCCGGGACCCGGAGACGCCCTCGTCTCCACGTGAGTGGGATTTACACTTTGTTTCTTCACTTGTCTGT  
 TAAGTTTTACATTTGGAGTGTTTTTGTGTTTGGAGATATTAGTGCAGGTCAATTCGAAAAAGTACCACGTTCTTTCAAAA  
 AGTCACATGAATAGGGGATAGAAAAATATTTCTTCTTGGAGAACAGGCAAGCGCTAGCCACTTAAATGAGGCATCCCA  
 ATTGCAAGATTCTTCTGCATCGGTCAGGTCAGTGAAGTAACAGCGAAAAGAGAATCTTTTAAAGAAGAAAGAAATTA

ACTTGACACTGTGGATCACCTTCGGCCAAGGGACACGACTGGAGATTATACGTAAATAATTCTTCACTTTTGTCTTCTG  
AAATTTGCGTCTGATGGCCACTATTGACTTTTAGAGGCTTAAATAGGAGTTTGGTGAAG

### SUDHL-6\_L\_HA\_mTruquoise2\_F2A

CCTACCATCTAACATTTTACTATGTGTTTCTTACAAACAAGAATATTCTCCTAAATAATCTTGATACACCAATGAAAA  
CATTACTCTATCGGCTCCTGAGGAATATTTAAAATTCTCAAAAAATACCTAAAAATTGTTTCTCTTAATAAAATAGTC  
CCCAGTAGAAACACATTCTCTGCAGACAAATTTGTGCTACCTGGTCTTACCTGGGACACCTGGGGACACTGAGCTGGT  
GCTGAGTTACTGAGATGAGCCAGCTCTGCAACTGTGCCAGCCTGCCCATCCCTGCTCATTTGCATGTTCCAGAGC  
ACAACCTCCTGCCCTGAAGCCTTATTAATAGGCTGGTCACACTTTGCGAAGTAGTCAGACCCAGTCAGGACACAGCATG  
GTGAGCAAGGGCGAGGAGCTGTTACCCGGGGTGGTGCCATCCTGGTCGAGCTGGACGGCGACGTAAACGGCCACAAGT  
TCAGCGTGTCCGGCGAGGGCGAGGGCGATGCCACCTACGGCAAGCTGACCCTGAAGTTCATCTGCACCACCGCAAGCT  
GCCCCTGCCCTGGCCACCCTCGTGACCACCCTGTCTGGGGCGTGCAGTGCTTCGCCCCTACCCCGACCACATGAAG  
CAGCAGACTTCTTCAAGTCCGCCATGCCGAAGGCTACGTCCAGGAGCGCACCATCTTCTTCAAGGACGACGGCAACT  
ACAAGACCCGCGCGAGGTGAAGTTCGAGGGCGACACCCTGGTGAACCGCATCGAGCTGAAGGGCATCGACTTCAAGGA  
GGACGGCAACATCCTGGGGCACAAGCTGGAGTACAATACTTTAGCGACAACGTCTATATCACCGCCGACAAGCAGAAG  
AACGGCATCAAGGCCAACTTCAAGATCCGCCACAACATCGAGGACGGCGGGCTGCAGCTCGCCGACCACTACCAGCAGA  
ACACCCCATCGGCGACGGCCCCGTGCTGCTGCCGACAACCACTACCTGAGCACCCAGTCCAAGCTGAGCAAAGACCC  
CAACGAGAAGCGCGATCACATGGTCTGCTGGAGTTCGTGACCGCCGCGGGATCACTCTCGGCATGGACGAGCTGTAC  
AAGGTGACAGAGTTGCTGTACAGGATGAAGCGGGCCGAGACCTACTGTCCAAGGCCTCTGCTGGCAATTCACCCAACGG  
AGGCTCGGCATAAGCAAAGATTGTGGCCCTGTCAAGCAGACTCTGAACTTCGATTTGCTCAAACCTGGCCGGCGATGT  
GGAGTCCAATCCGGGACCCGGAGACGCCCTCGTCTCCACGTGAGTAGAATTCGGACTTTGCCTACTGACTTGTCTGTGT  
ATTCGGTTCACTAGGTCTGTGAAGTGATCTATAACGTGACTCGGCAATCGGCCTCTGATCTCCTTCAGGCAAAGATAA  
AAATAAGTCTGTGTCAAACCTCGAGACTGGGTGCACATCTTCTTTGAAGAGCAGGCAAGGCAACATTCAGTCATTGGG  
TGAGAATACTTTGTCTAAGCATTGACTTCAGGAGTGTCTGGGGAACATAACATGTTCTGGAGACAGTCTCGGGCAATT  
GTCAAAGGGGAATTTTCTTTAGGAGGGAAGTTAAGAGGAACCCTTGTGTAAACACTTATGACCAGGGGACCAAGGTG  
GAGTCAAAGGTAAGTACTTTTTTCACTGATTCTTCATGG

### U2932\_L\_HA\_mTruquoise2\_F2A

CCATCATGCATTTAGGGAGCTGACTGGGCACAAGTTGGAGCAGAAAGAGAAAAATGAAACCACAGCCTTCTATTTTGT  
TCTAACAGACTTGTACCAAACATTTCTGTGGCTCAATCTAGGTGATGGTGAGACAAGAGGACACAGGGGTTAAATTTCTGT  
GGCCGAGGGGAGAAGTTCTACCCTCAGACTGAGCCAACGGCCTTTTCTGGCCTGATCACCTGGGCATGGGCTGCTGAG  
AGCAGAAAGGGGAGGAGATTGTCTCTGCAGCTGCAAGCCAGCACCCGCCCCAGCTGCTTTGCATGTCCCTCCCAGCC  
GCCCTGCAGTCCAGAGCCATATCAATGCCTGGGTGAGAGCTCTGGAGAAGAGCTGCTCAGTAGTACCTACCCG  
CATGGTGAGCAAGGGCGAGGAGCTGTTACCCGGGGTGGTGCCATCCTGGTCGAGCTGGACGGCGACGTAAACGGCCAC  
AAGTTCAGCGTGTCCGGCGAGGGCGAGGGCGATGCCACCTACGGCAAGCTGACCCTGAAGTTCATCTGCACCACCGGCA  
AGCTGCCCGTGCCCTGGCCACCCTCGTGACCACCCTGTCTGGGGCGTGCAGTGCTTCGCCCCTACCCCGACCACAT  
GAAGCAGCAGACTTCTTCAAGTCCGCCATGCCGAAGGCTACGTCCAGGAGCGCACCATCTTCTTCAAGGACGACGGC  
AACTACAAGACCCGCGCGAGGTGAAGTTCGAGGGCGACACCCTGGTGAACCGCATCGAGCTGAAGGGCATCGACTTCA  
AGGAGGACGGCAACATCCTGGGGCACAAGCTGGAGTACAATACTTTAGCGACAACGTCTATATCACCGCCGACAAGCA  
GAAGAACGGCATCAAGGCCAACTTCAAGATCCGCCACAACATCGAGGACGGCGGGCTGCAGCTCGCCGACCACTACCAG  
CAGAACACCCCATCGGCGACGGCCCCGTGCTGCTGCCGACAACCACTACCTGAGCACCCAGTCCAAGCTGAGCAAAG  
ACCCCAACGAGAAGCGCGATCACATGGTCTGCTGGAGTTCGTGACCGCCGCGGGATCACTCTCGGCATGGACGAGCT  
GTACAAGGTGACAGAGTTGCTGTACAGGATGAAGCGGGCCGAGACCTACTGTCCAAGGCCTCTGCTGGCAATTCACCCA  
ACGGAGGCTCGGCATAAGCAAAGATTGTGGCCCTGTCAAGCAGACTCTGAACTTCGATTTGCTCAAACCTGGCCGGCG  
ATGTGGAGTCCAATCCGGGACCCGGAGACGCCCTCGTCTCCACGTGAGTAGAATTTAAAGTTGCTTACTTAGTTGTCT  
GTGCTTTCTGCTCCGGTGTCTATGAAGTGATCTATAAACTGACTCTGCAATCAGCCTCTGATATCCTTCAGGAAAAG  
AAAAAGATAAGTCTGTAGTCAAACCTCGAGAATTGATTGCACATTTTCTTTGAAGAGCAAGCAAGATTTCAGTCATTGGGT  
GAGAATAACTTGTCTAAGTAATAGCTTCAGAAATGTCCTGGGGAACATAACATGTTCTGGACAGAGCCTTGGTCAATTG  
TCAGAAAGGGAGTTTTTGTATAGGAGGGAAGTTAAGAGGAACCATTGTGTGTACTTTTTGGCCAGGGGACCAAGCTGG  
AGATCAAACGTAAGTACTTTTTTCACTGATTCTTCACTGTTGCTA

**H-HVR fragments**

Fragments of DNA as inserted in the into pSC-B-amp/kan plasmid (Agilent Technologies) and used for ligation mediated assembly of repair template plasmids for H-HVR replacement.

**The sequences are marked as follows:**

Introns: GTTATAT

Exons in bold: **CCTTAAA**

F2A: GTGACAG

Splice donor and acceptor sites: **GT AG**

Silent changes to prevent re-targeting of repair template plasmid and modified genomic locus: **ACTGC**

Silent mutations to disrupt restriction enzyme site: **T**

BsmBI restriction sites: GAGACG and CGTCTC

BbsI restriction sites: GAAGAC and GTCTTC

Cas9/sgRNA sites: underlined

**HBL-1\_H-HVR**

GGACACTGA**GAAGACCT**ACCC**AAACACCTGTGGTTCTTCTCCTCCTGGTGGCAGCTCCCGGAT****GT**GAGTGTCTCAGGA  
 ATGCGGATATGAAGATATGAGATGCTGCCTCTGATCCCAGGACTACTGTGGGTTTCTCTGTTCCAC**AG**GGGTCCTGTCC  
 CAGGTGCAGCTACAGCAGTGGGGCGCAGGACTGTTGAAGCCTTCGGAGACCCTGTCCCTCACTTGC**CGCTGTCTATGGTG**  
**GGTCCTTCACTGATTACTACTGGACCTGGATCCGTCAGTCCCAGGAAAGGGGCTGGAGTGGATTGGGGAAATCAATCG**  
**TAGTGGAAAGTACCGACTACAACCCGTCCTCAAGAGTCGAGTCACCATATCACTAGACACGTCCAAGAACCAATTCTCC**  
**CTGCATCTGACCTCTGTGACCGCCGCGGACACGGCTCTATATTACTGTGCGGGGGGACAAGACTACGGTACTATGTTA**  
**GGGGGGTAGTACTACTGGGGCCAGGAAACCTGGTCACCGTCTCCTCAG****GTGGGTCTTC**GACC

**OCI-Ly7\_H-HVR**

GGAA**CGTCTCC**ACCC**GACTGGACCTGGAGGTTCTCTTTGTGGTGGCAGCAGCTACAG****GT**AAGGGGCTTCTAGTCCTA  
 AGGCTGAGGAAGGGATCCTGGTTTAGTTAAAGAGGATTTTATTCACCCCTGTGTCCTCTCCAC**AG**GTGTCCAGTCCCAG  
 GTACAGTTGGTGCAGTCTGGGGCTGAGGTGAAGAAGCCTGGGTCCTCGGTGAATGTCTCCTGCAAGACTTCTAGAGACA  
 CCTTCAGCAGCTATGCTATCAACTGGGTGCGACAGGCCCTGGACAAGGGTTTGGAGTGGATGGGAGGGATCATCCCTAT  
 CGTTGGTACAGCAA**ACTACACACAGAAGTTC**CAGGGCAGAGTCACGATTACCGCGGACGAATCCACGAGCACAA**CTAC**  
**ATGGA**ACTGAGCAGCCTGACATATGAAGACACGGCCGTTTATTACTGTGTGACCGGCCCGGGGGCTGTTTGGAG**CG**  
**CTGGGGACAGGGAAT****ACTGGTCA**AGT**TCCTCAG****GTGGAGACGAAACC**

**OCI-Ly19\_H-HVR**

GGATGT**CGTCTCC**ACCC**AAGTTGGGGCTGTGCTGGGTTTCTTGTGGTATTTTAGAAG****GT**GATTCATGGAAA**ACTAG**  
 AGAGATTTAGTGTGTGGATATGAATGAGACAAACAGTGGATATGTGTGGCAGTTTCTGATTTTGGTGTCTCTTTGTT  
 TGC**AG**GTGTCCAGTGTGAAGTTGAGTTGGTGGAGTCTGGGGGAGGGTTGGTACAGCCTGGGGGGTCTT**GAGACTCTCC**  
**TGTGAAGTCTCTGGATTACCTTCAATACCTATACTATGAGCTGGGTCCGCCAGGCTCCAGGTAAGGGGCTGGAGTGGG**  
**TTTCAAATATTAGTAGTAGTAGTAGTGCATATACTATGCAGGCTCTGTGAAGGGCCGATTATCATCTCCAGAGACAA**  
**TGCCAAAA**ACTCATTATATCTGCAAATGAACAACCTGAGAGCCGAGGACACGGCTGTCTATTTCTGTGCGCGAGCGTCT****  
**TATGATT**CGGGACTTATTTCCACGACTACTGGGGCCAGGGAAC**ACT**CGTCA**AGT**CTCTCCTCAG**GT**GGAGACGACC****

**SUDHL-4\_H-HVR**

GGAC**GAAGACCT**ACCC**AAACATCTGTGGTTCTTCTCCT****GTCTGGT****GTGGCAGCTCCCAGAT****GT**GAGTGTCTCAGGGATCCA  
 GACATGGGGATATGGGAGGCGCCTCTGATCCCAGGGCTCACTGTGGGTCTCTCTGTTCCAC**AG**GGGTCCTGTCCAGATG  
 CACCTGCAGGCGTGGGGCCGGACTGCTGAAGCCTTCGGAGACCCTGTCCCTCACCTGC**ACTGTCTCTGGTGGCTCCA**  
**TCAGTAGTTACTCTGGACTTGGATCCGGCAGCCCCAGGGAGGGGGCTAGAGTGGATTGGGAATATCTCTTATAGTGA**  
**AACCGACTACAATCCCTCCCTCAAGAGTCGAGTCACCATGTCACTGGACATGTCCAAGAATGAGTTCTCCCTGAAGTTG**  
**GGCTCTGTGACCGCCGCTGACACGGCCATCTATTACTGCGCGAGACGGAGCCCTGAC****CTATGG****CACA**ACTTTGACTTCT****  
**GGGGCCAGGGAACCTGGTCACCGTCTCCTCAG****GTGGGTCTTC**GACC

**SUDHL6-H-HVR**

GGACGAAGACCTACCCGAGTTGGGGCTGTGCTGGGTTTTCTTGTTGCTATTTTAGAAGGTGATTCATGGAAAACCTAGAGAGATTTAGTGTGTGTGGATATGAGTGAGAGAAACAGTGGATATGTGTGGCAGTTTCTGACCTTGGTGTCTCTTTGTTTGCAGGTGTCCAGTGTGAAGTGCAGATGGTGGAACTCTGGGGGAACCTTGGTACACCCGGGGGGTCCCTGAGACTCTCCTGTACAGCCTCAGAATTTAATTTAATTCCTATACTATTAATTGGGTCCGCTGCCTCCAGGGAAGGGCCTAGAGTGGATTGCAAATATAAGTAGTACTGGCAGTGACATATATTATGTAGACTCTTTGAAGGGCCGGTTCACCATCTCCAGAGACAATGCCAAGAATTCGGTATATCTCCAAATGACTGGTCTGAAAGACGAGGACACGGCTGTCTACTATTGTGCGACGGGGGGAACTGGACTCCACCAGGGGTCTTCTTTACTGGGGCTGGGAACCTGGTACAGTCTCCTCAGGTGGTCTTCGACC

#### TMD8\_H-HVR

GGAAACGTCCTCCACCCGATTTGGGGCTGTGCTGGGTTTTCTTGTTGCTATTTTAGAAGGTGATTCATGTAACACTGGAGAGACTTAGTCTGTGTGGATAGGAGTGAGAAAAAGAGAGGATATGTGCGGCAGTTTGTGACCTTGGTGTCTTTTTCTTTACAGGTGGCCAGTGTAGAGTGCAACTGGTGGAGTCTGGGGGAGACCTGGTACAGTCGGGGGGTCCCTGAGACTCTCCTGTAGCCTCTGGATTCACCTTTAGTTCTTACAGTATGAACTGGGTCCGCCAGGCTCCAGGAAAGGGACTGGACTGGGTCATATATATTAGTGGTACTAGTGGAACCATATACTACACAGACTCTGTGAAGGGCCGATTATCATCTCCAGAGACAATGCGAAGAATTCGCTATATTTACAAATGAACAGCCTGAGAGATGATGACACGGCTGTCTATTATTGTGTGAGAGATCGGGTGGGGGTAACCCATGGGGCCGCGGAACCTGGTACCCTGTCCCTCAGGTGGAGACGAAACC

#### U2932\_H-HVR

GGACGAAGACCTACCCAAGCACCTGTGGTTCTTCTCCTGCTGGTGGCGGCTCCAGATGTGAGTGTCTTAGGATGCAGACATGGAGATATGGGAGACTGCCTCTGATCCCAGGGCTCACTGTGGGTTTTCTGTTCACAGGGTCTGTCCAGCTGCAGCTGCAGGAGTCGGGCCAGGACTGGTGAAGCCTTCGGAGACCCTGTCCCTCACCTGCAGTGTCTCTCGTGTCTCCATCAGCAGTAGTAATTACTACTGGGGCTGGATCCGCCAGCCCCAGGGAAGGGGCTGGAATGGATTGGGAGTGACTATTATGGTGGCAGTACCTCCTACAACCCGTCCCTCAAGGGTCGAGTCATTATATCCGTAGACACGTCCAAGAACCATTCTCCCTGAAACTGACCTCTGTGACCGCCGACACAGGCTCTATATTACTGTGCGAGAGCGCTGTCTTACTATGATACTGGTGGTTTCAGGTACTTCTTCGATTAATGGGGCCAGGGAACCTGGTACAGTCTCCTCAGGTGGTCTTCGACC



**L-HVR fragments**

Fragments of DNA as inserted in the into pSC-B-amp/kan plasmid (Agilent Technologies) and used for ligation mediated assembly of repair template plasmids for L-HVR replacement.

The sequences are marked as follows:

Introns: GTTATAT

Exons in bold: **CCTTAAA**

F2A: GTGACAG

Splice donor and acceptor sites: **GT AG**

Silent changes to prevent re-targeting of repair template plasmid and modified genomic locus: **ACTGC**

BsmBI restriction sites: GAGACG and CGTCTC

Cas9/sgRNA sites: underlined

**HBL-1\_L-HVR**

GGAA**CGTCTCC**ACCC**GAGAC**CC**GCGCAGCTTCTCTTCTCCTGCTACTCTGGCTCCCAG****GT**GAGGGGAACATGGGAT  
GGTTTTGCATGTCAGTGAAAACCCCTCTCAAGTCCTGTTACCTGGCAACTCTGCTCAGTCAATACAATAATTAAAGCTCT  
GTATAAAGCAATAATTCTGGCTCTTCTGGGAAGACAATGGGTTTATTGATTACATGGGTGACTTTTTCTGTTTTATT  
TCCAATCTC**AG**ATACCACCGGAGAAATTGTGTTGACGCAGTCTCCAGGCACCC**TGTCTTTGTCTCCAGGGGAAAGAGCC**  
**ACCCTCTCCTGCAGGGCCAGTCAGAGTATTAGCAGCAACTACTTAGCCTGGTTCCAGCTGAAAGGTGGCCAGGCTCCCA**  
**GGCTCCTCATCTTTGGTGCATCCAACAGGGCCACTGGCATCCAGACAGGTTCCAGTGGCAGTGGGTCTGGGACAGACTT**  
**CACTCTCACCATCAGCAGACTGGAGCCTGAAGATTTTGCAGTGTATTACTGTCAGCAGTATGGTAGCTCACCGATCACT**  
**TTCGGCCCTGG****ACA****AAG****GTGGATATCAAAC****GT**GGAGACGAAACC

**OCI-Ly7\_L-HVR**

GGAA**CGTCTCC**ACCC**GTGTTGCAGAC****A****CAGGCTTTCATTTCTCTGTTGCTCTGGATCTCTG****GT**GAGGAATTAAAAAGTG  
CCACAGTCTTTTTCAGAGTAATATCTGTGTAGAAATAAAAAAATTAAGATATAGTTGGAAATAATGACTATTTCCAATA  
TGGATCCAATTATCTGCTGACTTATAATACTACTAGAAAGCAAATTTAAATGACATATTTCAATTATATGTGAGACAGC  
GTGTATAAGTTTATGTATAATCATTGTCCACTACTGACTAC**AG****GTGCCTACGGGGACATCGTGTATGACCCAGTCTCCAG**  
**ACTCCCTGGCTGTGTCTCTGGGCGAGAGGGCCACCATCAACTGCAAGTCCAGCCAGACTGTTTTATACGGCTCCAACAA**  
**TAAAACTACTTAGCTTGGTACCAACAGAAACCAGGACAGCCTCCTAAGTTGCTCATTTACTGGGCATCTACCCGGGAA**  
**TCCGGGGTCCCTGACCGATTTCAGTGGCAGCGGGTCTGGGACAGATTTTCAGTCTCACCATCAGCAGCCTGCAGGCTGAAG**  
**ATGTGGCAGTTTATTACTGTCAGCAATATTATAGTAA****CCCCCTGGAC****CTT****GG****CAAGGGACCAAGGTGGAAATCAA****AC**  
**T**GGAGACGAAACC

**OCI-Ly19\_L-HVR**

GGAA**CGTCTCC**ACCC**GACATGAGGGTCCCCGCTCAGCTCCTGGGGCTCCTGCTACTCTGGCTCCGAG****GT**AAGGATGGAG  
AACACTAGGAATTTACTCAGCCAGTGTACTCAGTACTGA**TCGA****AC**CTTCAGGGAAAATCTCTGATAACATGATTAGTAG  
TAAAAATCTTTGTTTTTATGTTTTCACTTTC**AG****GTGCCAGATGTGACATCCAGATGACCCAGTCTCCCTCGTCCCTGTC**  
**AGCATCTGTAGGAGACAGAGTCACTATCACTTGCCGGGCAAGTCAGAATATTAGGACCAATTTAAATTGGTATCAACAA**  
**AAACCAGGGAGGGCCCCTAAGGTCCTGATCTATGCCGCTTCCAGTTTGCAAAGTGGAGTCCCATCAAGATTCAGTGGCA**  
**GTGGATCTGGGACATATTTCACTCTCACCATTAGCAGTCTGCAGCCTGAGGATTTTGCAACTTTCTATTGTCAACAGAC**  
**GTACAGTTTCGTCTGGACGTTCCGGCCAAGG****ACA****AA****AGTGGAAATCAGAC****GT**GGAGACGAAACC

**SUDHL-4\_L-HVR**

GGAA**CGTCTCC**ACCC**AGGCTCCCTGCTCAGCTCCTGGGGCTGCTAATGCTCTGGGTCTCTG****GT**AAGAAAAGAAGGAGAT  
GAGGAAGGAGAATAGGGTGGGAGGGTGGAGCTCTAGGGCTCCACAGCATCCCATGATCCCATGTTTGTAGTCTTAC**ACTGG**  
TTAGAGGAGCATCATCTGTGCTGTAGAAAAGGGAACTTGATATTTTGTCTCTGTGAATAATTAGAAGCCTCATACTAAT  
ATGACGTATG**TT**GTCTCTGATTAAGATCTTCAAAAATATTTAGGTCTCTTATACTTAACAAAAATGAATTCATTTTAGAG  
TGTGTATTTTAAAGGCATAAATCACTATTTTTTATAATTAAGTTTAAATAAATGACATAAGATGAATTATGAAAATTGC  
TCATTAGGTTTCTACATCACTTTGCAATTCATTATTT**AG****GCTCCGCTGGGGACATTGTGCTGACTCAGTCTCCACTCT**  
**CCCTGTCCGTACCCCTGGAGAGCCGGCCTCCATCTCCTGCAGGCTAGTCAGAGTCTCCTATATACTAGTGGACAGCA**  
**TTATTTGAATTGGTACGTCCAGAAGCCAGGGCAGTCTCCACAACCTTTGATCTATTTGGTTTCTAATCGGGCTCCGGG**

GTCCCTGACAGGTTCCGGTGGCAGTGGATCAGGCACAGATTTTACACTAAAAATCAGCAGAGTGGAGGCTGACGATGTTG  
 GGGTTTATTACTGTATGCAAGCCGTACAACTCCTCTCACCTTGGAGGAGGGACAAAAGTCGAGATCAAACGTGGAGA  
 CGAAACC

#### SUDHL-6\_L-HVR

GGAACGTCTCCACCCGACATGAGGGTCCCCGCTCAGCTCCTGGGGCTCCTGCTGCTCTGGCTCCAGGTAAAGGAAGGAG  
 AACACTAGGAATTTACTCAGCTCACTGTACTCAGTACTGCCTGGTTATTTCAGGGAAGTCTTCCTATAACATGATCAAAA  
 GTAACAAAATATGTGTCTCCATTTCCAATCTCAGGTGCCAAATGTGACATCCAGATGACCCAGTCTCCTTCCACCCTGT  
 CTGCATTTGTAGGAGACAGAATCACCATAACTTGCCGGGCCAGTCAGAGTATTTATAACTGGTTGGCCTGGTATCAACA  
 AAAACCAGGGAGAGCCCCAAAAGTCCTCGTCTATAAGGCGTCTAATTTACAAGGCGGCGTCCCATCAAGGTTTCAGCGGC  
 AGTGGATATGGGACAGAATTCAGTCTCACCATCAGCAGCCTGCAGCCTGAGGATTTTGCAACATATTACTGCCAACAGT  
 ATCAGAGTTATTCGTGGACTTTCGGCCAAGGGACCAAGGTGGAGATGAAACGTGGAGACGAAACC

#### TMD8-L-HVR

GGAACGTCTCCACCCAGGCTCCCTGCTCAGCTCCTGGGGCTGCTAATGCTCTGGGTCCAGGTAAAGGGTAGAAGGGAGA  
 TGAGGGAGGAGAAATGGCATGGAGCGGTGACTTCTGGGGCCCCACTGCCTCTAACAACAGTCATCTCTGGGGGTCTCACT  
 AACTCCTATGTGTGTTTCTTTCTATATTGGACATGTACATGTTGTCTCCAAAAACAAAGATCTGTGTGTGGGGAAG  
 ACTGATACTAAAACGGGATGATGTGGGGTCTTCTGGGGACCCCTTTGAGGCTTGGATCCCTTGAGTTGCACTTTGAAAC  
 TGTGTTTTTTTTGAGACATGGATAGATATGTGTGTAGCCTGAAATAAAGAAGAGATCCAAGTTTATGAAAATTACAGATG  
 AGCTTTATACATAGGCTTCTTATTCTTTCCAATTATTGTAGATCCAGTGGGAATGTGGTGTGACTCAGTCTCCACTC  
 TCCCTCTCCGTCACCCTAGGACAGCCGGCCTCCATCTCCTGCATGTCTAGTCGAAGTCTCGTACACAGTGATGGAACA  
 CTTATTTGAATTGGTTTTCATCAGAGGCCAGGCCAATCTCCGAGGCGCCTAATTTATAAAGTTTCTAACCGGGACTCTGG  
 GGTCACAGACAGATTCAGTGGCAGTGGGTGAGCACCATTTCACACTGAAGATCAGCAGGGTGGAGGCTGAGGATATT  
 GGGTTTATTATTGTATGCAAGCTACACACTGGCCTCCGTGGACGTTTCGGCCAAGGGACCAAGGTGGAAATTCACCTG  
 GAGACGAAACC

#### U2932\_L-HVR

GGAACGTCTCCACCCGAAACCCAGCGCAGCTTCTCTTCTCCTGCTACTCTGGCTCCAGGTGAGGGGAACATGGGAT  
 GGTTTTGCATGTCAGTGAAAACCTCTCAAGTCTGTTACCTGGCAACTCTGCTCAGTCAATTCATAAATTAAGCTCA  
 ATATAAAGCAATAATTCTGGCTCTTCTGGGGAGACAATGGGTTTGATTTAGATTACATGGGTGACTTTTCTGTTTTATT  
 TCCAATCTCAGATACCACCGGAGAAATTGTGTTGACGCAGTCTCCAGGCACCCGTCTTTGTCTCCAGGGGAAAGAGCC  
 ACCCTCTCCTGCAGGGCCAGTCAGAGTGTAGCAGCAGCTACTTAACCTGGTACCAGCAGAAACCTGGCCAGGCTCCCA  
 GGCTCCTCATCTATGGTTCGTTCCAACAGGGCCACTGGCATCCAGACAGGTTTCAGTGGCAGTGGGTCTGGGACAGACTT  
 CACTCTCACCATCAGCAGACTGGAGCCTGAAGATTTTGAGTGTATTACTGTCAGCAGTATCGTAGCTCACCTCCGACG  
 TGGACGTTTCGGCCAAGGGACAAAAGTCGAGATCAAACGTGGAGACGAAACC

**U2932 somatic hypermutation reverted HVR fragments**

Fragments of DNA as inserted in the into pSC-B-amp/kan plasmid (Agilent Technologies) and used for ligation mediated assembly of repair template plasmids for L-HVR and H-HVR replacement.

**The sequences are marked as follows:**

Introns: GTTATAT

Exons in bold: **CCTTAAA**

F2A: GTGACAG

Splice donor and acceptor sites: **GT AG**

Silent changes to prevent re-targeting of repair template plasmid and modified genomic locus: **ACTGC**

BsmBI restriction sites: GAGACG and CGTCTC

BbsI restriction sites: GAAGAC and GTCTTC

**U2932\_H-HVR\_reveted**

GGAC**GAAGACCT**ACCC**AAGCACCTGTGGTTCTTCCTCCTGCTGGTGGCGGCTCCCAGAT****GT**GAGTGTTTCTAGGATGCA  
 GACATGGAGATATGGGAGGCTGCCTCTGATCCCAGGGCTCACTGTGGGTTTTTCTGTTCAC**AG**GGGTCTGTCCCAGCT  
**GCAGCTGCAGGAGTCGGGCCAGGACTGGTGAAGCCTTCGGAGACCCTGTCCCTCACCTGCACCTGTCTCTGGTGGCTCC**  
**ATCAGCAGTAGTAGTTACTACTGGGGCTGGATCCGCCAGCCCCAGGGAAGGGGCTGGAGTGGATTGGGAGTATCTATT**  
**ATAGTGGGAGCACCTACTACAACCCGTCCCTCAAGAGTCGAGTCACCATATCCGTAGACACGTCCAAGAACCAGTTCTC**  
**CCTGAAGCTGAGCTCTGTGACCGCCGAGACACGGCTGTGTATTACTGTGCGAGAGCGCTGTATTACTATGATAGTAGT**  
**GGTTTCAGGTACTACTTTGACTACTGGGGCCAGGGAACCCTGGTCACCGTCTCCTCAG****GT**GGTCTTCGACC

**U2932\_L-HVR\_reverted**

GGAACGTCTCCACCC**GAAACCCAGCGCAGCTTCTCTTCCTCCTGCTACTCTGGCTCCCAG****GT**GAGGGGAACATGGG  
 ATGGTTTTGCATGTCAGTGAAAACCCCTCTCAAGTCCTGTTACCTGGCAACTCTGCTCAGTCAATACAATAAT  
 TAAAGCTCAATATAAAGCAATAATTCTGGCTCTTCTGGGAAGACAATGGGTTTGATTAGATTACATGGGTG  
 ACTTTTCTGTTTTATTTCCAATCTC**AG**ATACCACCGAGAAATTGTGTTGACGCAGTCTCCAGGCACCCTGTCTTT  
**GTCTCCAGGGGAAAGAGCCACCCTCTCCTGCAGGGCCAGTCAGAGTGTTAGCAGCAGCTACTTAGCCTGGTACCAGCAG**  
**AAACCTGGCCAGGCTCCCAGGCTCCTCATCTATGGTGCATCCAGCAGGGCCACTGGCATCCCAGACAGGTTTCAGTGGCA**  
**GTGGGTCTGGGACAGACTTCACTCTCACCATCAGCAGACTGGAGCCTGAAGATTTTGCAGTGTATTACTGTCAGCAGTA**  
**TGGTAGCTCACCTCCGACGTGGACGTTCCGCCAAGGGAC****AAA****GT****C**GAAATCAAAC**GT**GGAGACGAAACC

**Tetanus Toxoid recognizing HVR fragments**

Fragments of DNA as inserted in the into pSC-B-amp/kan plasmid (Agilent Technologies) and used for ligation mediated assembly of repair template plasmids for L-HVR and H-HVR replacement.

**The sequences are marked as follows:**

Introns: GTTATAT

Exons in bold: **CCTTAAA**

F2A: GTGACAG

Splice donor and acceptor sites: **GT AG**

Silent changes to prevent re-targeting of repair template plasmid and modified genomic locus: **ACTGC**

BsmBI restriction sites: GAGACG and CGTCTC

**TET-H-3-HVR**

GGAA**CGTCTCC**ACCC**GACTGGACCTGGAGGATCCTCTTTTTGGTGGCAGCAGCCACAG**GTAAAGGGCTGCCAAATCCCA  
GTGAGGAGGAAGGGATCGAGGCCAGTCAAGGGGAATTCCATCCACTCCTGTGTCTTCTCTAC**AGGTGCCACTCCAGG**  
**TCCAGCTGGTACAGTCTGGAGCTGAGGTGAAGAAGCCTGGGGCCTCAGTGAGGGTCTCCTGCAAGGCTTCTGGATACAC**  
**CTTCACTAGGTATGCTATGCATTGGGTGCGCCAGGCCCCCGGACAAAGGCTGAGTGGATGGGCTGGATCAACGTTGAC**  
**AATGGAAACACAGAATATTCACAGAAATTCAGGGCAGACTCACCATTACCAGGGACACATCCGCGAGCACAGCCTACA**  
**TGGAGCTGAGCAGCCTGACCTCTGACGACACGGCTGTATATTACTGTGCGAAAGATCGGGTCCGCGTAGTACAAGCTGC**  
**GACCACCCTTGACTTCTGGGGCCAGGGAAC****ACTGGTCACAGTCTCCTCAG**GTGGAGACGAAACC

**TET-L-3-HVR**

GGAA**CGTCTCC**ACCC**GAAACCCAGCGCAGCTTCTCTTCTCCTGCTACTCTGGCTCCAG**GTGAGGGGAACATGGGAT  
GGTTTTGCATGTCAGTGAAAACCCCTCTCAAGTCCCTGTTACCTGGCAACTCTGCTCAGTCAATAACAATAATTAAAGCTCA  
ATATAAAGCAATAATTCTGGCTCTTCTGGGAAGACAATGGGTTGATTTAGATTACATGGGTGACTTTTCTGTTTTATT  
TCCAATCTC**AGATACCACCGGAGAAATTGTATTGACACAGTCTCCAGGCACCCTGTCTTTGTCTCCAGGGGAAAGAGCC**  
**ACCCTCTCATGTAGGGCCAGTCAGACTATTTCCAGCAAGTACTTAGGCTGGTACCAGCAGAAACTTGGCCAGGCCTCCCA**  
**GGCTCCTCATCTATGGTGCATCCAGCAGGGCCACTGGCATCCAGACAGGTTTCAAGTGGCAGTGGGTCTGGGACAGACTT**  
**CACTCTCACCATCAGCAGACTGGAGCCTGAAGATTTTGCAGTGTATTACTGTGTCAGCAGTATGGTAGTTTATCAGCGATC**  
**ACCTTCGGCCAAGGGACACGACTGGAGATTAAC**GTGGAGACGAAACC

**TET-H-6-HVR**

GGAA**CGTCTCC**ACCC**GACTGGACCTGGAGCATCCTTTTTCTTGGTGGCAGCAGCAACAG**GTAAACGGACTCCCCAGTCCCA  
GGGCTGAGAGAGAAACCAGGCCAGTCAATGTGAGACTTCACCCACTCCTGTGTCTTCTCCAC**AGGTGCCACTCCAGGT**  
**GCAGCTGGTGAATCTGGAAGCGAGGTGCGGAAGCCTGGGGCCTCAGTGAAGTCTCCTGCAAGGCTCTGGTTACACC**  
**TTTTCCCGCTACGGCCTCACCTGGGTGCGACAGGCCCTGGACAAGGACTTGAATGGATGGGATGGATCAGCGGTTACA**  
**ATAGCAACACAACTATGCGCCGAAGTTCAGGGCAGAGTCACCATGACGACAGACACATCCACGAATACAGCCTACTT**  
**GGAAGTGGAGGCTCAGATCTAACGACACGGCCGTTTTATTACTGTGCGAGAGATTACTTTTCATTCGGGGAGTCAATAT**  
**TTTTTTGACTACTGGGGCCAGGGAAG****ACTTGTACAGTCTCGTCAG**GTGGAGACGAAACC

**TET-L-6-HVR**

GGAA**CGTCTCC**ACCC**GACATGAGGGTCCCCGCTCAGCTCCTGGGGCTCCTGCTACTCTGGCTCCGAG**GTAAAGGATGGA  
GAACACTAGGAATTTACTCAGCCAGTGTGCTCAGTACTGACTGGAACCTCAGGGAAAGTTCTCTGATAACATG  
ATTAATAGTAAGAATATTTGTTTTTATGTTTCCAATCTC**AGGTGCCAGATGTGACATCCGGTTGACCCAGTCTCC**  
**ATCCTCCCTATCTGCATCTGTGGGAGACAGAGTCACCATCACTTGCCGGTCAAGTCAAGCATTAGCACCTATTTAAAT**  
**TGGTATCAGCAGAAACCAGGGGAAGCCCTAAGATTCTAATCTATGCTGCATCCAGTCTGCACACTGGGGTCCCATCAA**  
**GGTTCAGTGGCAGTGGATCTGGGACAGATTTCACTCTCACCATAACCAGTCTGCAACCTGAAGATTTTGAATTTACCA**  
**CTGTCAACAGAGTTACAGTACCCCGTACACTTTTGGCCAGGGGAC****AAAGTCTGAAATCAAAC**GTGGAGACGAAACC

**Ovalbumin (OVA) recognizing HVR fragments**

Fragments of DNA as inserted in the into pSC-B-amp/kan plasmid (Agilent Technologies) and used for ligation mediated assembly of repair template plasmids for L-HVR and H-HVR replacement.

**The sequences are marked as follows:**

Introns: GTTATAT

Exons in bold: **CCTTAAA**

F2A: GTGACAG

Published sequence that used to re-create the HVR underlined **GGCTGT**

Splice donor and acceptor sites: **GT AG**

Changes to disrupt low GC window for better gBlock Synthesis **C**

BsmBI restriction sites: GAGACG and CGTCTC

**OVA-H-HVR**

GGAACGTCTCCACCC**GGATGGAGCTGTATCATCCTCTTTTTGGTAGCAACAGCTACAG****GT**AAGGGGCTCACAGTAGCA  
 GGCTTGAGATCTGGCAATACACTTGGGTGACAATGACATCCACTCTCTCTTTCTCTCCAT**AG**GTGTCCACTCCAGGT  
**CCA**ACTGCAGCAGCCTGGGGCTGTGTTGGTGAGGCCTGGGGCTTCAGTGAAGCTGTCCTGTAGAGCCTTCTGGCTACATC  
TTCACCAGTTACTGGATGAATTGGGTGAAACAGAGGCCTGGACAAGGCCTTGAATGGATTGGTATGATTGATTGTTTCAG  
ACAGAAAACTCACTACAATCAAATGTTCAAAGACAAGGCCACATTGACTGTTGACAAGTCTCCAATATAGCCTACAT  
TCAGCTCATCAGTCTGACATCTGAGGACTCTGCGGTCTATTACTGTTCAAGGGGAGTAAATCTGGGGCCAAGGGACT  
CTGGTCACTGTCTCTTCAG**GT**GGAGACGAAACC

**OVA-L-HVR\_01**

GGAACGTCTCCACCC**ATGAGTCCTGCCAGTTCCTGTTTCTGTTAGTGCTCTGGATTCCGGG****GT**AAGGAGTTCTGGAAT  
 GGGAGGGATGAGAATGGGGATGGAGGGTGATCTCTGGATGCCATATGTGTGCTGTTTATTTGTGGTGGGGCAGGTCATAT  
 CTCTAGGATGTGAGGTTTTGTTACATCCTAATGAGATATTCCAGATGGAACAGTAGCTGTACTAAGATCAATATTCTG  
 ACATAGATTGGATGGAGTGGTATAGACTCTGATGTTTAGAACCTTCAACATTTGTTTTATGACAA**C**ATATTTGATATAT  
**C**ATAT**C**TTTTAAATCTGAAAAACTGCTAGGATCTTACTTCAAAGGAATAGCATTTTCAAGTAAGATTTCAAGTAGATTTT  
 CAAGTAGATTTCAAAAGGTTGCTCAGGACCTTGCACATGATTTTCCACTATTGTATTGTAATTT**AG**AAACCAACG  
**GTGATGTTGTGATGACCCAGACTCCACTCACTTTGTGCGTTACCATTGGACAACCAGCCTCCATCTCTTGCAAGTCAAG**  
**TCAGAGCCTCTTAGATAGTGATGGAAAGACATATTTGAATTGGTTGTTACAGAGGCCAGGCCAGTCTCCAAAGCGCCTA**  
**ATCTATCTGGTGTCTAAACTGGACTCTGGAGTCCCTGACAGGTTTCAGTGGCAGTGGGTCTGGAACGGATTTCACTGA**  
**AAATCAGCAGAGTGGAGGCTGAGGATTTGGGAGTTTATTATTGCTGGCAAGCTACACATTTTCCTCAGACGTTCCGGTGG**  
**AGGTACCAAGTTGAAATCAAAC****GT**GGAGACGAAACC



TACTATGAGCTGGGTCCGCCAGGCTCCAGGTAAGGGGCTGGAGTGGGTTTCAAATATTAGTAGTAGTAGTAGTGCCATA  
TACTATGCAGGCTCTGTGAAGGGCCGATTCATCATCTCCAGAGACAATGCCAAAACTCATTATATCTGCAAATGAACA  
ACCTGAGAGCCGAGGACACGGCTGTCTATTTCTGTGCG

**CD79A modification repair template plasmids**

Fragments of DNA as inserted in the into pSC-B-amp/kan plasmid (Agilent Technologies).

**The sequences are marked as follows:**

Introns: GTTATA  
 Exons in bold: **CCTTAA**  
 Hinge: GGAGGA  
 GFP: ATGGTG  
 3xFLAG: GACTAT  
 bGH polyA signal site: CTTCTA  
 Y to F mutations: TAT to TTC

Silent changes to prevent re-targeting of repair template plasmid and modified genomic locus: **T**

**wtCD79A-hinge-GFP**

GAAGGAAGGAAGGAAGGAAGGAAGGAAGGAAGGAAGGAAGGAAGGAGAACACTGGTTGTAGACTCAGAGAGAAGTCTGTTA  
 CATAACCAGTATGTGGCCTTGGGGACATCTCTTACCCTTTCTGGAAAAGTACTTCCTGGCATCCAGGAGGGTCTGAAAG  
 ATATTCACCTCCCCCTGCTCACTGAGGCACCCACCCACCCCTACAG**AAACGATGGCAGAACGAGAAGCTCGGGT**  
**TGGATGCCGGGGATGAATATGAAGATGAAAATCTTTACGAAGGCCTGAACCTGGACGACTGCTCTATGTACGAAGACAT**  
**CTCCGGGGCCTCCAGGGCACCTACCAGGATGTGGGCAGCCTCAACATAGGAGATGTCCAGCTGGAGAAGCCGGAGGA**  
**GGCAGCGGTGGTGGAAAGTGGAGT**GAGCAAGGGCGAGGAGCTGTTACCGGGGTGGTGCCCATCCTGGTTCGAGCTGGACG  
 GCGACGTAAACGGCCACAAGTTCAGCGTGTCCGGCGAGGGCGAGGGCGATGCCACCTACGGCAAGCTGACCCTGAAGTT  
 CATCTGCACCACCGCAAGCTGCCCGTGCCTTGCCACCCCTCGTGACCACCTTCACCTACGGCGTGCAGTGTCTCGCC  
 CGCTACCCCGACCACATGAAGCAGCAGACTTCTTCAAGTCCGCCATGCCCGAAGGCTACGTCCAGGAGCGCACCATCT  
 TCTTCAAGGACGACGGCAACTACAAGACCCGCGCCGAGGTGAAGTTCGAGGGCGACACCCTGGTGAACCGCATCGAGCT  
 GAAGGGCATCGACTTCAAGGAGGACGGCAACATCCTGGGGACAAGCTGGAGTACAACAGCCACAAGGTCTAT  
 ATCACCGCCGACAAGCAGAAGAACGGCATCAAGGTGAACCTCAAGACCCGCCACAACATCGAGGACGGCAGCGTGCAGC  
 TCGCCGACCACTACCAGCAGAACACCCCATCGGGCAGCGCCCGTGTCTGCTGCCGACAACCACTACCTGAGCACCCA  
 GTCCGCCCTGAGCAAAGACCCCAACGAGAAGCGCGATCACATGGTCTGCTGGAGTTCGTGACCGCCGCCGGGATCACT  
 CTCGGCATGGACGAGCTGTACAAG**TAA**GATCAGCCTCGACTGTGCCTTCTAGTTGCCAGCCATCTGTTGTTTGCCCTC  
 CCCCCTGCCTTCCCTGACCCTGGAAGGTGCCACTCCCACTGTCCCTTCCCTAATAAAATGAGGAAATTGCATCGCATTGT  
 CTGAGTAGGTGTCTATTCTATTCTGGGGGGTGGGGTGGGGCAGGACAGCAAGGGGGAGGATTGGGAAGACAATAGCAGGC  
**ATGCTGGGGA****GAA****GACATCTCCCGGGCCTCCAGGGCACCTACCAGGATGTGGGCAGCCTCAACATAGGAGATGTCCAG**  
**CTGGAGAAGCCG****TGA****CACCCCTACTCCTGCCAGGCTGCCCCCGCCTGCTGTGCACCCAGCTCCAGTGTCTCAGCTCACT**  
**TCCCTGGGACATTTCTCCTTTACGCCCTTCTGGGGGCTTCCCTTAGTCATATTCCCCCAGTGGGGGGTGGGAGGGTAACCT**  
**CACTCTTCTCCAGGCCAGGCCTCCTTGACTCCCCTGGGGGTGTCCCACTCTTCTTCCCTCTAAACTGCCCCACCTCCT**  
**AACCTAATCCCCCGCCCCGCTGCCTTTCCAGGCTCCCTCACCCAGCGGGTAATGAGCC**

**wtCD79A-hinge-flag**

GAAGGAAGGAAGGAAGGAAGGAAGGAAGGAAGGAAGGAAGGAAGGAGAACACTGGTTGTAGACTCAGAGAGAAGTCTGTTA  
 CATAACCAGTATGTGGCCTTGGGGACATCTCTTACCCTTTCTGGAAAAGTACTTCCTGGCATCCAGGAGGGTCTGAAAG  
 ATATTCACCTCCCCCTGCTCACTGAGGCACCCACCCACCCCTACAG**AAACGATGGCAGAACGAGAAGCTCGGGT**  
**TGGATGCCGGGGATGAATATGAAGATGAAAATCTTTACGAAGGCCTGAACCTGGACGACTGCTCTATGTACGAAGACAT**  
**CTCCGGGGCCTCCAGGGCACCTACCAGGATGTGGGCAGCCTCAACATAGGAGATGTCCAGCTGGAGAAGCCGGAGGA**  
**GGCAGCGGTGGTGGAAAGTGGAGT**GACTATAAAGACGACGACGACAAAGACTATAAGGACGACGATGACAAGGATTACAAGG  
 ACGACGACGATAAG**TAA**GATCAGCCTCGACTGTGCCTTCTAGTTGCCAGCCATCTGTTGTTTGCCCTCCCCCTGCCT  
 TCCTTGACCCTGGAAGGTGCCACTCCCACTGTCCCTTCCCTAATAAAATGAGGAAATTGCATCGCATTGTCTGAGTAGGT  
 GTCATTCTATTCTGGGGGGTGGGGTGGGGCAGGACAGCAAGGGGGAGGATTGGGAAGACAATAGCAGGCATGCTGGGGA  
**GAA****GACATCTCCCGGGCCTCCAGGGCACCTACCAGGATGTGGGCAGCCTCAACATAGGAGATGTCCAGCTGGAGAAGC**  
**CGTGA****CACCCCTACTCCTGCCAGGCTGCCCCCGCCTGCTGTGCACCCAGCTCCAGTGTCTCAGCTCACTTCCCTGGGAC**  
**ATTCCTTTTACGCCCTTCTGGGGGCTTCCCTTAGTCATATTCCCCCAGTGGGGGGTGGGAGGGTAACCTCACTCTTCTC**  
**CAGGCCAGGCCTCCTTGACTCCCCTGGGGGTGTCCCACTCTTCTTCCCTCTAAACTGCCCCACCTCCTAACCTAATCC**  
**CCCCGCCCGCTGCCTTTCCAGGCTCCCTCACCCAGCGGGTAATGAGCC**





CCCCGTGCCTTCCTTGACCCTGGAAGGTGCCACTCCCCTGTCTTTCCCTAATAAAAATGAGGAAATTGCATCGCATTGT  
 CTGAGTAGGTGTCATTCTATTCTGGGGGGTGGGGTGGGGCAGGACAGCAAGGGGGAGGATTGGGAAGACAATAGCAGGC  
 ATGCTGGGGA **GAA**GACATCTCCCGGGGCTCCAGGGCACCTACCAGGATGTGGGCAGCCTCAACATAGGAGATGTCCAG  
 CTGGAGAAGCCG **TGA**CACCCCTACTCCTGCCAGGCTGCCCCGCCTGCTGTGCACCCAGCTCCAGTGTCTCAGCTCACT  
 TCCCTGGGACATTCCTTTTTCAGCCCTTCTGGGGGCTTCTTAGTCATATTCCCCCAGTGGGGGGTGGGAGGGTAACCT  
 CACTCTTCTCCAGGCCAGGCTCCTTGGACTCCCCTGGGGGTGTCCCCTCTTCTTCCCTCTAAACTGCCCCACCTCCT  
 AACCTAATCCCCCGCCCCGCTGCCTTTCCAGGCTCCCCTCACCCAGCGGGTAATGAGCC

#### Y199F CD79A-hinge-GFP

GAAGGAAGGAAGGAAGGAAGGAAGGAAGGAAGGAAGGAAGGAGAACACTGGTTGTAGACTCAGAGAGAACTGTTA  
 CATAACCAGTATGTGGCCTTGGGGACATCTCTTACCCTTTCTGGAAAAGTACTTCCTGGCATCCAGGAGGGTCTGAAAG  
 ATATTCACCTCCCCCTGCTCACTGAGGCACCCACCCACCCCTACAG **AAACGATGGCAGAACGAGAAGCTCGGGT**  
**TGGATGCCGGGGATGAATATGAAGATGAAAA** **CTTTA** **C**GAAGGCCTGAACCTGGACGACTGCTC **TATGTT** **GA** **GACAT**  
**CTCCCGGGGCTCCAGGGCACCTACCAGGATGTGGGCAGCCTCAACATAGGAGATGTCCAGCTGGAGAAGCCG** **GGAGGA**  
**GGCAGCGGTGGTGGAAGTGGA** **GTGAGCAAGGGCGAGGAGCTGTT** **CACCGGGTGGTGCCCATCCTGGT** **CGAGCTGGACG**  
**GCGACGTAAACGGCCACAAGTTCAGCGTGTCCGGCGAGGGCGAGGGCGATGCCACCTACGGCAAGCTGACCCCTGAAGTT**  
**CATCTGCACCACCGCAAGCTGCCCGTGCCCTGGCCACCCCTCGTGACCACCTTACCTACGGCGTGCAGTGTTCGCC**  
**CGTACCCCGACCACATGAAGCAGCAGACTTCTTCAAGTCCGCCATGCCCGAAGGCTACGTCCAGGAGCGCACCATCT**  
**TCTTCAAGGACGACGGCAACTACAAGACCCGCGCCGAGGTGAAGTTCGAGGGCGACACCCTGGTGAACCGCATCGAGCT**  
**GAAGGGCATCGACTTCAAGGAGGACGGCAACATCCTGGGGCACAAGCTGGAGTACAACAGCCACAAGGTCTAT**  
**ATCACCGCCGACAAGCAGAAGAACGGCATCAAGGTGAACCTCAAGACCCGCCACAACATCGAGGACGGCAGCGTGCAGC**  
**TCGCCGACCACTACCAGCAGAACACCCCATCGGCGACGGCCCGTGTCTGCTGCCGACAACCACTACCTGAGCACCA**  
**GTCCGCCCTGAGCAAAGACCCCAACGAGAAGCGCGATCACATGGTCTGCTGGAGTTCGTGACCGCCGCCGGGATCACT**  
**CTCGGCATGGACGAGCTGTACAAG** **TAA**GATCAGCCTCGACTGTGC **CTTCTAGTTGCCAGCCATCTGTTGTTT** **GCCCCTC**  
**CCCCGTGCCTTCCTTGACCCTGGAAGGTGCCACTCCCCTGTCTTTCCCTAATAAAAATGAGGAAATTGCATCGCATTGT**  
**CTGAGTAGGTGTCATTCTATTCTGGGGGGTGGGGTGGGGCAGGACAGCAAGGGGGAGGATTGGGAAGACAATAGCAGGC**  
**ATGCTGGGGA** **GAA**GACATCTCCCGGGGCTCCAGGGCACCTACCAGGATGTGGGCAGCCTCAACATAGGAGATGTCCAG  
**CTGGAGAAGCCG** **TGA**CACCCCTACTCCTGCCAGGCTGCCCCGCCTGCTGTGCACCCAGCTCCAGTGTCTCAGCTCACT  
**TCCCTGGGACATTCCTTTTTCAGCCCTTCTGGGGGCTTCTTAGTCATATTCCCCCAGTGGGGGGTGGGAGGGTAACCT**  
**CACTCTTCTCCAGGCCAGGCTCCTTGGACTCCCCTGGGGGTGTCCCCTCTTCTTCCCTCTAAACTGCCCCACCTCCT**  
**AACCTAATCCCCCGCCCCGCTGCCTTTCCAGGCTCCCCTCACCCAGCGGGTAATGAGCC**

**HT BCR re-expression repair template plasmid**

Fragment of DNA as inserted in the into pSC-B-amp/kan plasmid (Agilent Technologies).

**The sequences are marked as follows:**

Introns:

GTTATA

Exons in bold:

**CCTTAA**

Splice donor and acceptor sites: **GT AG**

Used Cas9/sgRNA sites:                     

Codon with predicted deletion repaired by A insertion **TAC**

Silent changes to prevent re-targeting of repair template plasmid and modified genomic locus: **T**

**HT\_HA\_1**

ATATGTGTGGCTCTTTCTAACCAATGTCTCTGTGTTTGC**AG**GTGTCCAGTCTGGGGTGCAGTTGGTGGAGACTGGAGGA  
**GGCTTGTTCAGCCGGGGGAGTCCCTGAGACTCTCCTGTGCAACCTCTGACTTCACCGTCAGTAACAACACTACATGGCCT**  
**GGGTCCGCCAGGCTCCAGGGAAGGGACTGAATTGGGTCTCACTTATCTCTGCCGCTGGTGTACATTCTACGCAGACTC**  
**CGTGAAGGGCCGATTCTCCATTTCCCGAGACAACCTCCAAGAACAACACTATATCTTCAAATGAC**A**AG**TCT**CAGAGCCGAG**  
**GACACGGCCATGTATTACTGTGCGAGAGCATCTTTTGCAACAAC**TACT**TACTTTGACTCCTGGAG**CAA**GGAA**ATC****  
**T**C**GTCACCGTCTCCTCAG**GT**GAGTCCTCAGAACCTCTCTCGGGGTCTGCTTCTGAAGGATATTGCTACATTTTCGGGGA**  
AAATTAAGGATGCTGGGTACCTGGCCAGACAGACGCGGACCACCCTGGGGTCTCAGGAGGAGGCCCTGAGGCAACAG  
CGGCCGCACAGACGAGGTACAAGGACTCCAGATGTCCCTTCTCCAGAGCCCAAACCACGGGTCTCTCTGTGCCTAGG  
ACCACCCTAGGCCTCTGGGGTCCAATGTCCCACAAGTCCCGGGCCCTCCCCGGCCTCAGTCTTAGAGGGTCCCAGGGAC  
GTGGCGG

**AKT activity FRET reporter and control plasmids**

DNA coding for the AKT activity reporter and control constructs as inserted in the sleeping beauty donor plasmid pSBbi-Pur between SfiI restriction sites.

**The sequences are marked as follows:**

SfiI restriction sites: **ggcctctgagGCC** and **ggcctgtcaggcc**

Lyn tag: **GGGTGC**

Cerulean3: **gtgagc**

Sequence surrounding Thr-24 of FOXO1 CCTCGT

cpVenus[E172] **ggcggcg**

Valine instead of Threonine in catalytically dead Lyn-AKT-AR2: **GTC**

TRAF2 spacer: **TGCGAG**

**Lyn-AKT-AR2**

aagct**ggcctctgagGCC**ACC**ATGGGTGCATTAAGTCTAAGCGGAAGGACAAA**AAGGATCCC**atg**gtgagcaagggcg  
aggagctgttcaccggggtggtgcccatcctggtcgagctggacggcgacgtaaacggccacaggttcagcgtgtccgg  
cgagggcgagggcgatgccacctacggcaagctgacctgaagttcatctgcaccaccggcaagctgcccgtgccctgg  
cccaccctcgtgaccaccctgAGCtggggcgtgcagtgttcgcccgtaccccgaccacatgaagcagcagcacttct  
tcaagtccgccatgccgaaggctacgtccaggagcgtaccatcttcttcaaggacgacggcaactacaagaccgcg  
cgaggtgaagttcgagggcgacaccctggtgaaccgcatcgagctgaagggcatcgacttcaaggaggacggcaacatc  
ctggggcacaagctggagtacaacgccatCACGGCaagctctatatcaccgccgacaagcagaagaacggcatcaagg  
ccAACTtcGGCCTCAACTGCaacatcgaggacggcagcgtgcagctcgccgaccactaccagcagaacacccccatcgg  
cgacggccccgtgctgctgcccgacaaccactacctgagcaccagtcgcccctgagcaaagaccccacgagaagcgc  
gatcacatggtcctgctggagttcgtgaccgcccgggatcactctcgccatggacgagctgtacaagcgcatgcata  
agttttctcaagaacagatcggcgaaaacattgtgtgcagggtcatttgtaccacgggtcaaattcccacccgagattt  
gtcagctgatatttcacaagtgttaaggaaaaacgatccataaagaaagtttggacatttggtagaaaccagcctgt  
gactatcatttaggaacatttcaagactgtcaaataagcatttccaaataactactaggagaagacggtaaacctttat  
tgaatgacatttccactaatgggacctggttaaagggcaaaaagtcgagaagaacagcaatcagttactgtctcaagg  
tgatgaaataaccgttgggtgtaggctggaatcagatattttatctctgggtcattttcataaacgacaaaatttaagcag  
tgccctcgagcagaacaaagttgatcgtctgcaggtgaagccagggcagcggcgagggcgagcaccaggcctggctgacC  
CTCGTCCGCGCTCGTGCACCTGGCCGGACCCAGGCCGGAGTTTGGAGGTACCGGCGGCAGCgagctcatg**ggcggcg**  
gcagctcgccgaccactaccagcagaacacccccatcggcgacggccccgtgctgctgcccgacaaccactacctgagc  
taccagtccaagctgagcaaagaccccacgagaagcgcgatcacatggtcctgctggagttcgtgaccgcccggga  
tactctcgccatggacgagctgtacaag**ggaggtaccgggtgatctatg**gtgagcaagggcgaggagctgttcaccgg  
ggtggtgcccatcctggctcgagctggacggcgacgtaaacggccacaagttcagcgtgtccggcgagggcgagggcgat  
gccacctacggcaagctgacctgaagctgatctgcaccaccggcaagctgcccgtgcccaccctcgtgacca  
cctgggctacggccttcagtgttcgcccgtaccccgaccacatgaagcagcagcacttcttcaagtccgccatgcc  
cgaaggctacgtccaggagcgcaccatcttcttcaaggacgacggcaactacaagaccgcccggaggtgaagttcgag  
ggcgacaccctggtgaaccgcatcgagctgaagggcatcgacttcaaggaggacggcaacatcctggggcacaagctgg  
agtacaactacaacagccacaacgtctatatcaccgccgacaagcagaagaacggcatcaaggccaacttcaagatccg  
ccacaacatcgag**taaggcctgtcaggcca**aag

**Dead-Lyn-AKT-AR2**

aagct**ggcctctgagGCC**ACC**ATGGGTGCATTAAGTCTAAGCGGAAGGACAAA**AAGGATCCC**atg**gtgagcaagggcg  
aggagctgttcaccggggtggtgcccatcctggtcgagctggacggcgacgtaaacggccacaggttcagcgtgtccgg  
cgagggcgagggcgatgccacctacggcaagctgacctgaagttcatctgcaccaccggcaagctgcccgtgccctgg  
cccaccctcgtgaccaccctgAGCtggggcgtgcagtgttcgcccgtaccccgaccacatgaagcagcagcacttct  
tcaagtccgccatgccgaaggctacgtccaggagcgtaccatcttcttcaaggacgacggcaactacaagaccgcg  
cgaggtgaagttcgagggcgacaccctggtgaaccgcatcgagctgaagggcatcgacttcaaggaggacggcaacatc  
ctggggcacaagctggagtacaacgccatCACGGCaagctctatatcaccgccgacaagcagaagaacggcatcaagg  
ccAACTtcGGCCTCAACTGCaacatcgaggacggcagcgtgcagctcgccgaccactaccagcagaacacccccatcgg  
cgacggccccgtgctgctgcccgacaaccactacctgagcaccagtcgcccctgagcaaagaccccacgagaagcgc  
gatcacatggtcctgctggagttcgtgaccgcccgggatcactctcgccatggacgagctgtacaagcgcatgcata  
agttttctcaagaacagatcggcgaaaacattgtgtgcagggtcatttgtaccacgggtcaaattcccacccgagattt  
gtcagctgatatttcacaagtgttaaggaaaaacgatccataaagaaagtttggacatttggtagaaaccagcctgt

gactatcatttaggaaacatttcaagactgtcaataagcatttccaaatactactaggagaagacggtaaccttttat  
 tgaatgacatttccactaatgggacctggttaaaggggcaaaaagtcgagaagaacagcaatcagttactgtctcaagg  
 tgatgaaataaccgttgggtgtaggcgtggaatcagatattttatctctgggtcattttcataaacgacaaatttaagcag  
 tgacctgagcagaacaaagttgatcgctctgcaggttaagccaggcagcggcgaggcgagcaccaggcctggctgacC  
 CTCGTCCGCGCTCGTGC**GTG**TGGCCGGACCCAGGCCGGAGTTGGAGGTACCGGCCGAGCgagctcatg**ggcggcgt**  
**gcagctcgccgaccactaccagcagaacacccccatcgccgacggccccgtgctgctgcccgacaaccactacctgagc**  
**taccagtc**caagctgagcaaaagacccccaacgagaagcgcgatcacatggctcctgctggagttcgtgaccgcccggga  
 tcactctcgcatggacgagctgtacaag**ggaggtaccgggtgatct****atg**gtgagcaagggcgaggagctgttcaccgg  
 ggtggtgcccacctcctggctgagctggacggcgacgtaaacggccacaagttcagcgtgtccggcgagggcgagggcgat  
 gccacctacggcaagctgacctgaagctgatctgcaccaccggcaagctgcccgtgcccctggcccacctcgtgacca  
 cctggggctacggccttcagtgcttcgcccgtaccaccgaccacatgaagcagcagcacttcttcaagtcggccatgcc  
 cgaaggctacgtccaggagcgcaccatcttcttcaaggacgacggcaactacaagaccgcgcccagggtgaagttcgag  
 ggcgacaccctggtgaaccgcatcgagctgaagggcatcgacttcaaggaggacggcaacatcctggggcacaagctgg  
 agtacaactacaacagccacaacgtctatatcaccgcccgaacgagaagaacggcatcaaggccaacttcaagatccg  
 ccacaacatcgag**taaggcctgtcaggccaag**

### Ceruean3

aagct**ggcctctgagGCCACC****ATG**GTGCGGGTTCTCATCATCATCATCATCATGGTATGGCTAGCATGACTGGTGGAC  
 AGCAAATGGGTCTGGGATCTGTACGACGATGACGATAAGGATCCC**atg**gtgagcaagggcgaggagctgttcaccggggt  
 ggtgcccacctcctggctgagctggacggcgacgtaaacggccacaggttcagcgtgtccggcgagggcgagggcgatgcc  
 acctacggcaagctgacctgaagttcatctgcaccaccggcaagctgcccgtgcccctggcccacctcgtgaccacce  
 tgAGCTggggcgtgagctgcttcgcccgtaccaccgaccacatgaagcagcagcacttcttcaagtcggccatgccga  
 aggctacgtccaggagcgtaccatcttcttcaaggacgacggcaactacaagaccgcgcccagggtgaagttcgagggc  
 gacaccctggtgaaccgcatcgagctgaagggcatcgacttcaaggaggacggcaacatcctggggcacaagctggagt  
 acaacgccatcCAGGCCaacgtctatatcaccgcccgaacgagaagaacggcatcaaggccaACTtccGGCCTCAACTG  
 Caacatcgaggacggcagcgtgcagctcgccgaccactaccagcagaacacccccatcgccgacggccccgtgctgctg  
 cccgacaaccactacctgagcaccagtcgcccctgagcaaaagacccaacgagaagcgcgatcacatggctcctgctgg  
 agttcgtgaccgcccgggatcactctcggcatggacgagctgtacaag**cg**catgcataagttttctcaagaacagat  
 cggcgaaaacattgtgtgcag**taaggcctgtcaggccaag**

### cpVenus [E172]

aagct**ggcctctgagGCCACC****ATG**GTGCGGGTTCTCATCATCATCATCATCATGACgaaaaacattgtgtgcagggtca  
 tttgtaccacgggtcaaatccactccgagatttgtcagctgatatttcacaagtgcttaaggaaaaacgatccataaa  
 gaaagtttggacatttggtagaaaccagcctgtgactatcatttaggaaacatttcaagactgtcaataagcatttc  
 caaatactactaggagaagacggtaaccttttattgaatgacatttccactaatgggacctggttaaagggcaaaaag  
 tcgagaagaacagcaatcagttactgtctcaaggtgatgaaataaccgttgggtgtaggcgtggaatcagatattttatc  
 tctgggtcattttcataaacgacaaatttaagcagtgctcgcagcagaacaaagttgatcgctctgcaggttaagccaggc  
 agcggcgagggcgagcaccaggcctggctgac**CCTCGTCCGCGCTCGTGACCTGGCCGGACCCAGGCCGGAGTTG**  
**GAGGTACCGGCCGAGCgagctcatg****ggcggcgtg**cagctcgccgaccactaccagcagaacacccccatcgccgacgg  
**ccccgtgctgctgcccgacaaccactacctgagctaccagttcaagctgagcaaaagacccaacgagaagcgcgatcac**  
**atggtcctgctggagttcgtgaccgcccgggatcactctcggcatggacgagctgtacaag****ggaggtaccgggtggat**  
**ct****atg**gtgagcaagggcgaggagctgttcaccggggtggtgcccacctcctggctgagctggacggcgacgtaaacggcca  
 caagttcagcgtgtccggcgagggcgagggcgatgccacctacggcaagctgacctgaagctgatctgcaccaccggc  
 aagctgcccgtgcccctggcccacctcgtgaccacctgggctacggccttcagtgcttcgcccgtaccaccgaccaca  
 tgaagcagcagcacttcttcaagtcggccatgccgaaggctacgtccaggagcgcaccatcttcttcaaggacgacgg  
 caactacaagaccgcgcccagggtgaagttcgagggcgacaccctggtgaaccgcatcgagctgaagggcatcgacttc  
 aaggaggacggcaacatcctggggcacaagctggagtacaactacaacagccacaacgtctatatcaccgcccgaacg  
 agaagaacggcatcaaggccaacttcaagatccgccacaacatcgag**taaggcctgtcaggccaag**

### C3-cpV

aagct**ggcctctgagGCCACC****ATG**GTGCGGGTTCTCATCATCATCATCATCATGGTATGGCTAGCATGACTGGTGGAC  
 AGCAAATGGGTCTGGGATCTGTACGACGATGACGATAAGGATCCC**atg**gtgagcaagggcgaggagctgttcaccggggt  
 ggtgcccacctcctggctgagctggacggcgacgtaaacggccacaggttcagcgtgtccggcgagggcgagggcgatgcc  
 acctacggcaagctgacctgaagttcatctgcaccaccggcaagctgcccgtgcccctggcccacctcgtgaccacce  
 tgAGCTggggcgtgagctgcttcgcccgtaccaccgaccacatgaagcagcagcacttcttcaagtcggccatgccga  
 aggctacgtccaggagcgtaccatcttcttcaaggacgacggcaactacaagaccgcgcccagggtgaagttcgagggc

gacaccctggtgaaccgcatcgagctgaagggcatcgacttcaaggaggacggcaacatcctggggcacaagctggagt  
 acaacgccatcCACGGCaacgtctatatcaccgccgacaagcagaagaacggcatcaaggccAACTtcGGCCTCAACTG  
 Caacatcgaggacggcagcgtgcagctcgccgaccactaccagcagaacacccccatcgggcgacggccccgtgctgctg  
 cccgacaaccactacctgagcaccagtcgccctgagcaagaccccaacgagaagcgcgatcacatggtcctgctggtg  
 agttcgtgaccgccgcccgggatcactctcgccatggacgagctgtacaagTCCGGACTCAGATCTatgggcgcgctgca  
 gctcgccgaccactaccagcagaacacccccatcgggcgacggccccgtgctgctgcccgacaaccactacctgagctac  
 cagtccaagctgagcaagaccccaacgagaagcgcgatcacatggtcctgctggagttcgtgaccgccgcccgggatca  
 ctctcgccatggacgagctgtacaagggaggtaccgggtggatctatgggtgagcaagggcgaggagctgttcaccggggt  
 ggtgcccatcctggtcgagctggacggcgacgtaaacggccacaagttcagcgtgtccggcgagggcgagggcgatgcc  
 acctacggcaagctgaccctgaagctgatctgcaccaccggcaagctgcccgtgccctggcccaccctcgtgaccacce  
 tgggctacggccttcagtgtctcgcccgtacccccgaccacatgaagcagcagcacttcttcaagtccgccatgcccga  
 aggtacgtccaggagcgcaccatcttcttcaaggacgacggcaactacaagaccgcgcccaggtgaagttcgagggc  
 gacaccctggtgaaccgcatcgagctgaagggcatcgacttcaaggaggacggcaacatcctggggcacaagctggagt  
 acaactacaacagccacaacgtctatatcaccgccgacaagcagaagaacggcatcaaggccaacttcaagatccgcca  
 caacatcgagtaaggcctgtcaggccaag

### C3-spacer-cpV

aagctggcctctgagGCCACCATG GTGCGGGGTTCTCATCATCATCATCATCATGGTATGGCTAGCATGACTGGTGGAC  
 AGCAAATGGGTCGGGATCTGTACGACGATGACGATAAGGATCCC atgggtgagcaagggcgaggagctgttcaccggggt  
 ggtgcccatcctggtcgagctggacggcgacgtaaacggccacaggttcagcgtgtccggcgagggcgagggcgatgcc  
 acctacggcaagctgaccctgaagttcatctgcaccaccggcaagctgcccgtgccctggcccaccctcgtgaccacce  
 tgAGCTggggcgctgcagtgcttcgcccgtacccccgaccacatgaagcagcagcacttcttcaagtccgccatgcccga  
 aggtacgtccaggagcgtaccatcttcttcaaggacgacggcaactacaagaccgcgcccaggtgaagttcgagggc  
 gacaccctggtgaaccgcatcgagctgaagggcatcgacttcaaggaggacggcaacatcctggggcacaagctggagt  
 acaacgccatcCACGGCaacgtctatatcaccgccgacaagcagaagaacggcatcaaggccAACTtcGGCCTCAACTG  
 Caacatcgaggacggcagcgtgcagctcgccgaccactaccagcagaacacccccatcgggcgacggccccgtgctgctg  
 cccgacaaccactacctgagcaccagtcgccctgagcaagaccccaacgagaagcgcgatcacatggtcctgctggtg  
 agttcgtgaccgccgcccgggatcactctcgccatggacgagctgtacaagcgcatgcataagttttctcaagaacagat  
 cggcgaaaacattgtgtgcaggggtcatttgtaccacgggtcaaattcccacccagatttgtcagctgatatttcaaa  
 gtgcttaaggaaaaacgatccataaagaaagtttgacatttggtagaaaaccagcctgtgactatcatttaggaaca  
 tttcaagactgtcaataagcatttccaaataactactaggagaagacggtaaccttttattgaatgacatttccactaa  
 tgggacctggttaaatgggcaaaaagtcgagaagaacagcaatcagttactgtctcaaggatgaataaccgttgggt  
 gtaggcgtggaatcagatattttatctctggtcattttcataaacgacaaaatttaagcagtgccctcgagcagaacaaag  
 ttgatcgtctctgcaggtgaagccagcagcggcgagggcagcaccgaagggcctggtcgacCCTCGTTGCGAGAGCCTGGA  
 GAAGAAGACGGCCACTTTTGAGAACATTGTCTGCGTCTGAACCGGGAGGTGGAGAGGGTGGCCATGACTGCCGAGGCC  
 TGCAGCCGGCAGCACCGGCTGGACCAAGACAAGATTGAAGCCCTGAGTAGCAAGGTGCAGCAGCTGGAGAGGAGCATTG  
 GCCTCAAGGACCTGGCGATGGCTGACTTGGAGCAGAAGGTCTTGGAGATGGAGGCATCCACCTACGATGGGGTCTTCAT  
 CTGGAAGATCTCAGACTTCGCCAGGAAGCGCCAGGAAGCTGTGGCTGGCCGCATACCCGCCATCTTCTCCCCAGCCTTC  
 TACACCAGCAGGTACGGCTACAAGATGTGTCTGCGTATCTACCTGAACGGCGACGGCACCGGGCGAGGAACACACCTGT  
 CCTCTTCTTTGTGGTGATGAAGGGCCCGAATGACGCCCTGTGCGGTGGCCCTTCAACCAGAAGGTGACCTTAATGCT  
 GCTCGACCAGAATAACCGGGAGCACGTGATTGACGCCTTACGGCCCGACGTGACTTCATCCTCTTTTCAGAGGCCAGTC  
 AACGACATGAACATCGCAAGCGGCTGCCCCCTCTTCTGCCCGTCTCCAAGATGGAGGCAAAGAATTCCTACGTGCGGG  
 ACGATGCCATCTTCATCAAGGCCATTGTGGACCTGACAGGGGCTCCCGAGTTTGGAGGTACCGGGCGGCAGCgagctcat  
 gggcgcgctgcagctcgccgaccactaccagcagaacacccccatcgggcgacggccccgtgctgctgcccgacaaccac  
 tacctgagctaccagttcaagctgagcaaaagaccccaacgagaagcgcgatcacatggtcctgctggagttcgtgaccg  
 ccgcccgggatcactctcgccatggacgagctgtacaagggaggtaccgggtggatctatgggtgagcaagggcgaggagct  
 gttcaccggggtggtgcccatcctggtcgagctggacggcgacgtaaacggccacaagttcagcgtgtccggcgagggc  
 gagggcgatgccacctacggcaagctgaccctgaagctgatctgcaccaccggcaagctgcccgtgccctggcccacc  
 tctgaccaccctgggctacggccttcagtgtctcgcccgtacccccgaccacatgaagcagcagcacttcttcaagtc  
 cgccatgcccgaaggctacgtccaggagcgcaccatcttcttcaaggacgacggcaactacaagaccgcgcccaggtg  
 aagttcgagggcgacaccctggtgaaccgcatcgagctgaagggcatcgacttcaaggaggacggcaacatcctggggc  
 caaagctggagtacaactacaacagccacaacgtctatatcaccgccgacaagcagaagaacggcatcaaggccaactt  
 caagatccgccacaacatcgagtaaggcctgtcaggccaag

## SUPPLEMENTAL REFERENCES

1. Tiller T, Meffre E, Yurasov S, Tsuiji M, Nussenzweig MC, Wardemann H. Efficient generation of monoclonal antibodies from single human B cells by single cell RT-PCR and expression vector cloning. *J Immunol Methods*. 2008;329(1-2):112-124.
2. Doenecke A, Winnacker EL, Hallek M. Rapid amplification of cDNA ends (RACE) improves the PCR-based isolation of immunoglobulin variable region genes from murine and human lymphoma cells and cell lines. *Leukemia*. 1997;11(10):1787-1792.
3. Brochet X, Lefranc MP, Giudicelli V. IMGT/V-QUEST: the highly customized and integrated system for IG and TR standardized V-J and V-D-J sequence analysis. *Nucleic Acids Res*. 2008;36(Web Server issue):W503-508.
4. Giudicelli V, Brochet X, Lefranc MP. IMGT/V-QUEST: IMGT standardized analysis of the immunoglobulin (IG) and T cell receptor (TR) nucleotide sequences. *Cold Spring Harb Protoc*. 2011;2011(6):695-715.
5. Cong L, Ran FA, Cox D, et al. Multiplex genome engineering using CRISPR/Cas systems. *Science*. 2013;339(6121):819-823.
6. Ran FA, Hsu PD, Wright J, Agarwala V, Scott DA, Zhang F. Genome engineering using the CRISPR-Cas9 system. *Nat Protoc*. 2013;8(11):2281-2308.
7. Hsu PD, Scott DA, Weinstein JA, et al. DNA targeting specificity of RNA-guided Cas9 nucleases. *Nat Biotechnol*. 2013;31(9):827-832.
8. Covassin LD, Siekmann AF, Kacergis MC, et al. A genetic screen for vascular mutants in zebrafish reveals dynamic roles for Vegf/Plcg1 signaling during artery development. *Dev Biol*. 2009;329(2):212-226.
9. Minskaia E, Nicholson J, Ryan MD. Optimisation of the foot-and-mouth disease virus 2A co-expression system for biomedical applications. *BMC Biotechnol*. 2013;13:67.
10. Goedhart J, von Stetten D, Noirclerc-Savoie M, et al. Structure-guided evolution of cyan fluorescent proteins towards a quantum yield of 93%. *Nat Commun*. 2012;3:751.
11. DeKosky BJ, Ippolito GC, Deschner RP, et al. High-throughput sequencing of the paired human immunoglobulin heavy and light chain repertoire. *Nat Biotechnol*. 2013;31(2):166-169.
12. Dougan SK, Ogata S, Hu CC, et al. IgG1+ ovalbumin-specific B-cell transnuclear mice show class switch recombination in rare allelically included B cells. *Proc Natl Acad Sci U S A*. 2012;109(34):13739-13744.
13. Ran FA, Hsu PD, Lin CY, et al. Double nicking by RNA-guided CRISPR Cas9 for enhanced genome editing specificity. *Cell*. 2013;154(6):1380-1389.
14. Kowarz E, Loscher D, Marschalek R. Optimized Sleeping Beauty transposons rapidly generate stable transgenic cell lines. *Biotechnology journal*. 2015;10(4):647-653.
15. Beum PV, Lindorfer MA, Hall BE, et al. Quantitative analysis of protein co-localization on B cells opsonized with rituximab and complement using the ImageStream multispectral imaging flow cytometer. *J Immunol Methods*. 2006;317(1-2):90-99.
16. Davis RE, Brown KD, Siebenlist U, Staudt LM. Constitutive nuclear factor kappaB activity is required for survival of activated B cell-like diffuse large B cell lymphoma cells. *J Exp Med*. 2001;194(12):1861-1874.
17. Avalos AM, Bilate AM, Witte MD, et al. Monovalent engagement of the BCR activates ovalbumin-specific transnuclear B cells. *J Exp Med*. 2014;211(2):365-379.
18. Honczarenko M, Le Y, Glodek AM, et al. CCR5-binding chemokines modulate CXCL12 (SDF-1)-induced responses of progenitor B cells in human bone marrow through heterologous desensitization of the CXCR4 chemokine receptor. *Blood*. 2002;100(7):2321-2329.
19. Zhou X, Clister TL, Lowry PR, Seldin MM, Wong GW, Zhang J. Dynamic Visualization of mTORC1 Activity in Living Cells. *Cell Rep*. 2015.
20. Gao X, Zhang J. Spatiotemporal analysis of differential Akt regulation in plasma membrane microdomains. *Mol Biol Cell*. 2008;19(10):4366-4373.
21. He L, Wu X, Simone J, Hewgill D, Lipsky PE. Determination of tumor necrosis factor receptor-associated factor trimerization in living cells by CFP->YFP->mRFP FRET detected by flow cytometry. *Nucleic Acids Res*. 2005;33(6):e61.
22. Komatsu N, Aoki K, Yamada M, et al. Development of an optimized backbone of FRET biosensors for kinases and GTPases. *Mol Biol Cell*. 2011;22(23):4647-4656.

23. Mates L, Chuah MK, Belay E, et al. Molecular evolution of a novel hyperactive Sleeping Beauty transposase enables robust stable gene transfer in vertebrates. *Nat Genet.* 2009;41(6):753-761.
24. Zal T, Gascoigne NR. Photobleaching-corrected FRET efficiency imaging of live cells. *Biophys J.* 2004;86(6):3923-3939.
25. Chen H, Puhl HL, 3rd, Koushik SV, Vogel SS, Ikeda SR. Measurement of FRET efficiency and ratio of donor to acceptor concentration in living cells. *Biophys J.* 2006;91(5):L39-41.
26. Ma W, Wang M, Wang ZQ, et al. Effect of Long-Term Storage in Trizol on Microarray-Based Gene Expression Profiling. *Cancer Epidemiol Biomarkers Prev.* 2010;19(10):2445-2452.
27. Subramanian A, Tamayo P, Mootha VK, et al. Gene set enrichment analysis: a knowledge-based approach for interpreting genome-wide expression profiles. *Proc Natl Acad Sci U S A.* 2005;102(43):15545-15550.
28. Heberle H, Meirelles GV, da Silva FR, Telles GP, Minghim R. InteractiVenn: a web-based tool for the analysis of sets through Venn diagrams. *BMC Bioinformatics.* 2015;16:169.
29. Spurgeon SE, Coffey G, Fletcher LB, et al. The selective SYK inhibitor P505-15 (PRT062607) inhibits B cell signaling and function in vitro and in vivo and augments the activity of fludarabine in chronic lymphocytic leukemia. *J Pharmacol Exp Ther.* 2013;344(2):378-387.
30. Somoza JR, Koditek D, Villasenor AG, et al. Structural, biochemical, and biophysical characterization of idelalisib binding to phosphoinositide 3-kinase delta. *J Biol Chem.* 2015;290(13):8439-8446.
31. Furlong MT, Mahrenholz AM, Kim KH, Ashendel CL, Harrison ML, Geahlen RL. Identification of the major sites of autophosphorylation of the murine protein-tyrosine kinase Syk. *Biochim Biophys Acta.* 1997;1355(2):177-190.
